# Supplementary material for: Studies on asymmetric total synthesis of (−)-β-hydrastine via a chiral epoxide ring-opening cascade cyclization strategy
Source: Royal Society of Chemistry journal article supplement (doi:10.1039/d0ra03038d), 2020-01-01
Supplement: d0ra03038d1.pdf [file d0ra03038d1.pdf]

## Supporting Information

### Studies on Asymmetric Total Synthesis of (–)-β-Hydrastine by Chiral Epoxide Ring-Opening Cascade Cyclization Strategy

Jihui Li,<sup>a</sup> Tianxiao Wu,<sup>a</sup> Xinjing Song,<sup>a</sup> Yang Zheng,<sup>a</sup> Jiaxin Meng,<sup>a</sup> Qiaohua Qin,<sup>a</sup> Yongxiang Liu,<sup>a, b, c</sup> Dongmei Zhao,<sup>\*a</sup> Maosheng Cheng<sup>a</sup>

<sup>a</sup>Key Laboratory of Structure-Based Drug Design & Discovery of Ministry of Education, Shenyang Pharmaceutical University, Shenyang, 110016, China. E-mail: medchemzhao@163.com.

<sup>b</sup>Wuya College of Innovation, Shenyang Pharmaceutical University, Shenyang 110016, P. R. China.

<sup>c</sup>Institute of Drug Research in Medicine Capital of China, Benxi, 117000, P. R. China.

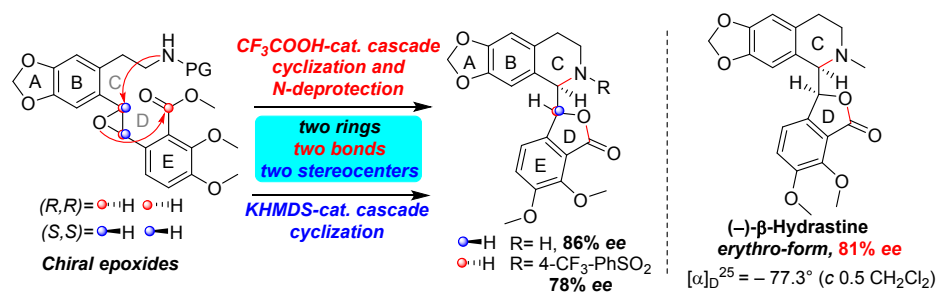

## Table of Contents

|                                                                                               |    |
|-----------------------------------------------------------------------------------------------|----|
| 1. General Information-----                                                                   | 2  |
| 2. Experimental Procedures-----                                                               | 3  |
| 3. Natural Product Spectral Comparisons-----                                                  | 17 |
| 4. Copies of <sup>1</sup> H and <sup>13</sup> C NMR Spectra, HRMS (MS) and HPLC Spectra ----- | 22 |
| 5. References-----                                                                            | 55 |

## 1. General Information

All reagents and solvents were obtained from commercial suppliers and used without further purification unless otherwise indicated. Tetrahydrofuran (THF) was freshly distilled over sodium metal under a N<sub>2</sub> atmosphere prior to each use. All reactions were monitored by thin layer chromatography (TLC) (250 μm thickness, F-254 indicator) and visualized by UV irradiation. Volatile solvents were removed under reduced pressure using a rotary evaporator. Flash column chromatography was performed over silica gel (200 - 300 mesh) purchased from Yantai Jiangyou Co., China.

Proton nuclear magnetic resonance (<sup>1</sup>H NMR, 400 MHz and 600 MHz) and carbon nuclear magnetic resonance (<sup>13</sup>C NMR, 100 MHz and 150 MHz) spectra were recorded in CDCl<sub>3</sub>, DMSO-*d*<sub>6</sub> on a Bruker ARX-600 NMR or Bruker ARX-400 NMR spectrometer with TMS as an internal standard. Chemical shifts are reported in parts per million (δ ppm) with respect to the residual solvent signal. Peak multiplicities are reported as follows: s = singlet, brs = broad singlet, d = doublet, t = triplet, q = quartet, dd = doublet of doublets, td = triplet of doublets, dt = doublet of triplets, m = multiplet. High resolution accurate mass spectrometry determinations (HRMS) were obtained on a Bruker Micromass Time of Flight mass spectrometer equipped with an electrospray ionization (ESI) detector. Melting points were determined with Buchi melting point B-540 and are uncorrected. Optical rotation was determined at room temperature with an MCP-200 polarimeter (Anton-Paar), sodium lamp and are reported as follows: [α]<sub>λ</sub><sup>T °C</sup> concentration (c = g / 100 mL, solvent).

The enantiomeric excess (*ee*) was determined by HPLC using a Shimadzu LC 20A series instrument equipped with UV detector. The HPLC analysis data was reported in relative area % and was not adjusted to weight %. The used chiral HPLC columns were as follows: CHIRALPAK<sup>®</sup> IH (0.46 cm I.D. ×15 cm L ×5 μm), CHIRALPAK<sup>®</sup> IF (0.46 cm I.D. ×15 cm L ×5 μm).

## 2. Experimental Procedures

### The Synthesis of Substituted Styrene 6

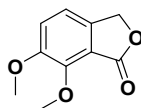

**6,7-Dimethoxyisobenzofuran-1(3H)-one (10).** To a solution of 2,3-dimethoxybenzoic acid (**8**, 8.0 g, 43.96 mmol, 1.0 equiv.) in dibromomethane (CH<sub>2</sub>Br<sub>2</sub>, 96 mL) were added Pd(OAc)<sub>2</sub> (0.49 g, 0.05 mmol) and K<sub>2</sub>HPO<sub>4</sub> (19.1 g, 109.89 mmol, 2.5 equiv.). After being stirring at 96 °C for 8.0 h, the reaction mixture was cooled to room temperature and filtrated. The filtrate was washed with sat. NaCl, dried over Na<sub>2</sub>SO<sub>4</sub>, filtered and concentrated under reduced pressure to yield crude. The crude product was purified by column chromatography on silica gel, eluting with petroleum ether/EtOAc = 10:1 - 2:1 to yield **10** as a white solid. Yield: 66% (5.6 g). Mp: 92.8 - 96.0 °C. <sup>1</sup>H NMR (600 MHz, DMSO-*d*<sub>6</sub>) δ 7.48 (d, *J* = 8.2 Hz, 1H), 7.28 (d, *J* = 8.2 Hz, 1H), 5.26 (s, 2H), 3.89 (s, 3H), 3.85 (s, 3H). <sup>13</sup>C NMR (100 MHz, CDCl<sub>3</sub>) δ 168.61, 152.46, 148.58, 139.47, 119.64, 118.05, 116.51, 68.51, 62.39, 56.96. HRMS (ESI<sup>+</sup>): *m/z* calcd. for C<sub>10</sub>H<sub>11</sub>O<sub>4</sub> [M+H]<sup>+</sup> = 195.0657, found 195.0642.

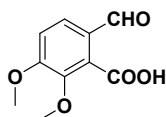

**6-Formyl-2,3-dimethoxybenzoic acid (11).** 6.22 g (30.0 mmol, 1.0 equiv.) 6,7-dimethoxyisobenzofuran-1(3H)-one (**10**), 6.27 g (35.0 mmol, 1.16 equiv.) NBS and 0.47 g AIBN (0.53 g, 3.0 mmol, 0.1 equiv.) were dissolved in CCl<sub>4</sub> (108 mL). After being heating to reflux for 4.0 h, the reaction mixture was cooled to room temperature and filtrated. The filtrate was concentrated under reduced pressure. To the residue was added 10% aq. KOH (60 mL) and heated to 40 °C for 4.0 h. After cooling the mixture to room temperature and following washing the aqueous solution with CH<sub>2</sub>Cl<sub>2</sub> (2 × 20 mL), the pH is adjusted to 1.0 - 2.0 with 2 N HCl. After stirring for 1.0 h at 5 °C, the precipitate was filtered to give the crude product **11**. Yield: 75% (4.72 g). The product was used without purification in the next step. Mp: 143.6 - 145.3 °C.

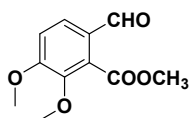

**Methyl 6-formyl-2,3-dimethoxybenzoate (12).** To a solution of 6-formyl-2,3-dimethoxybenzoic acid (**11**) (8.12 g, 38.67 mmol, 1.0 equiv.) in anhydrous MeOH (93 mL) were added SOCl<sub>2</sub> (7.0 mL, 96.67 mmol, 2.5 equiv.) at 0 °C. The reaction mixture was stirred at 0 °C for 30 min and then for additional 4.0 h at room temperature. After concentrating the mixture under reduced pressure, the residue was then extracted with CH<sub>2</sub>Cl<sub>2</sub> (2 × 50 mL). The combined organic layers were washed with brine, dried over Na<sub>2</sub>SO<sub>4</sub>, and concentrated *in vacuo*. The crude product was purified by column chromatography on silica gel, eluting with petroleum ether/EtOAc = 8:1 - 6:1 to yield **12** as a white solid. Yield: 87% (7.54 g). Mp: 78.5 - 80.1 °C. <sup>1</sup>H NMR (600 MHz, CDCl<sub>3</sub>) δ 9.83 (s, 1H), 7.61 (d, *J* = 8.5 Hz, 1H), 7.06 (d, *J* = 8.5 Hz, 1H), 3.98 (s, 3H), 3.97 (s, 3H), 3.89 (s, 3H). <sup>13</sup>C NMR (150 MHz, CDCl<sub>3</sub>) δ 188.91, 166.91, 157.84, 146.41, 129.48, 129.18, 126.69, 112.40, 61.77,

56.19, 52.78. HRMS (ESI<sup>+</sup>):  $m/z$  calcd. for C<sub>11</sub>H<sub>13</sub>O<sub>5</sub> [M+H]<sup>+</sup> = 225.0763, found 225.0757; calcd. for C<sub>10</sub>H<sub>9</sub>O<sub>4</sub> [M - OCH<sub>3</sub>]<sup>+</sup> = 193.0501, found 193.0501.

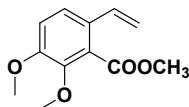

**Methyl 2,3-dimethoxy-6-vinylbenzoate (6).** To a cooled (0 °C), rapidly stirred suspension of methyltriphenylphosphonium iodide (14.66 g, 35.36 mmol, 2.0 equiv.) in THF (80 mL) was added KHMDS (26.5 mL of 1.0 M solution in THF, 26.52 mmol, 1.5 equiv.). The resulting bright yellow mixture was allowed to warm to room temperature and was maintained at room temperature for 0.5 h, at which time it was recooled to 0 °C and methyl 6-formyl-2,3-dimethoxybenzoate (**12**) (3.96 g, 17.68 mmol, 1.0 equiv.) was added in four portions. The resulting mixture was allowed to warm to room temperature with stirring, and after 0.5 h the reaction was quenched with H<sub>2</sub>O, then the mixture was concentrated *in vacuo* and extracted with EtOAc (2 × 50 mL). The combined organic extracts were washed with brine (50 mL), dried (Na<sub>2</sub>SO<sub>4</sub>), and concentrated. Purification of the residue by flash chromatography, eluting with petroleum ether/EtOAc = 10:1 – 8:1 to yield **6** as a colorless oil. Yield: 76% (3.03 g). <sup>1</sup>H NMR (600 MHz, CDCl<sub>3</sub>) δ 7.28 (d,  $J$  = 8.6 Hz, 1H), 6.94 (d,  $J$  = 8.6 Hz, 1H), 6.60 (dd,  $J$  = 17.4, 11.0 Hz, 1H), 5.61 (dd,  $J$  = 17.4, 0.8 Hz, 1H), 5.22 (dd,  $J$  = 11.0, 0.8 Hz, 1H), 3.93 (s, 3H), 3.88 (s, 3H), 3.86 (s, 3H). <sup>13</sup>C NMR (150 MHz, CDCl<sub>3</sub>) δ 167.97, 152.09, 145.87, 132.94, 129.39, 128.28, 121.43, 115.11, 113.78, 61.54, 56.03, 52.37. HRMS (ESI<sup>+</sup>):  $m/z$  calcd. for C<sub>12</sub>H<sub>15</sub>O<sub>4</sub> [M+H]<sup>+</sup> = 223.0970, found 223.0970; calcd. for C<sub>11</sub>H<sub>11</sub>O<sub>3</sub> [M - OCH<sub>3</sub>]<sup>+</sup> = 191.0708, found 191.0712.

### The Synthesis of (*R,R*)-Catalyst 13

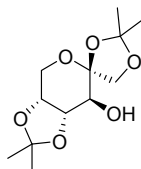

**1,2:4,5-Di-O-isopropylidene-D-psicopyranose (14).** To the D-fructose (30.0 g, 166.7 mmol) in acetone (600 mL) was added concentrated H<sub>2</sub>SO<sub>4</sub> (1.0 mL, 16.7 mmol) under N<sub>2</sub> after cooling to 0 °C. The resulting reaction mixture was stirred overnight at 25 °C. After neutralizing with 10% NaOH/H<sub>2</sub>O, the reaction mixture was concentrated to a solid, which was then dissolved in CH<sub>2</sub>Cl<sub>2</sub> (300 mL). The resulting solution was washed with water (3 × 150 mL) and brine (150 mL), dried over anhydrous Na<sub>2</sub>SO<sub>4</sub>, filtered, and concentrated to give a white solid. After recrystallization in *n*-hexane - CH<sub>2</sub>Cl<sub>2</sub> (4:1, v/v), alcohol **14** (23.7 g) was obtained as white needles. Yield: 54.6%; Mp: 118.2 – 120.5 °C, [α]<sub>D</sub><sup>25</sup> = – 153.3° (c 1.0, acetone); <sup>1</sup>H NMR (600 MHz, CDCl<sub>3</sub>) δ 4.21 (dd,  $J$  = 5.8, 2.9 Hz, 1H), 4.18 (d,  $J$  = 8.8 Hz, 1H), 4.14 (d,  $J$  = 6.9 Hz, 1H), 4.12 (dd,  $J$  = 13.3, 2.9 Hz, 1H), 4.01 (d,  $J$  = 13.3 Hz, 1H), 3.99 (d,  $J$  = 8.8 Hz, 1H), 3.67 (d,  $J$  = 6.9 Hz, 1H), 1.77 (brs, 1H), 1.54 (s, 3H), 1.52 (s, 3H), 1.45 (s, 3H), 1.37 (s, 3H). <sup>1</sup>H NMR data were in agreement with the described ones.<sup>1</sup> MS (ESI<sup>+</sup>):  $m/z$  [M+H]<sup>+</sup> = 261.2.

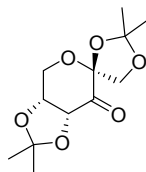

**1,2:4,5-Di-O-isopropylidene-D-erythro-2,3-hexodiuro-2,6-pyranose (13).** Compound **14** (6.53 g, 25.1 mmol), Et<sub>3</sub>BzNCl (290 mg, 1.3 mmol), NaIO<sub>4</sub> (8.06 g, 37.8 mmol), and K<sub>2</sub>CO<sub>3</sub> (530 mg, 3.8 mmol) were vigorously stirred in a mixture of 25 mL of CHCl<sub>3</sub> and 25 mL of H<sub>2</sub>O. RuCl<sub>3</sub> monohydrate (290 mg, 1.3 mmol) were added, and the reaction mixture was heated at 70 °C. 2-Propanol (10 mL) was added after 2 h, and the suspension was further stirred for 2 h. The reaction mixture was filtered through a Celite pad, and this material was washed with CH<sub>2</sub>Cl<sub>2</sub> (2 × 20 mL). This solution was mixed with the filtrate, the organic layer was separated, and the aqueous layer was extracted with CH<sub>2</sub>Cl<sub>2</sub> (2 × 20 mL). The combined organic extracts were washed with saturated Na<sub>2</sub>SO<sub>3</sub> (130 mL), brine (100 mL), and water (100 mL). The white solid was obtained after drying and evaporating the solvents. Purification of the crude product by flash chromatography, eluting with *n*-hexane - CH<sub>2</sub>Cl<sub>2</sub> (4:1, v/v) to yield **13** as a white acicular solid. Yield: 59.5% (3.87 g). Mp: 97.5 – 99.9 °C, [α]<sub>D</sub><sup>25</sup> = – 124.09° (c 1.0, acetone); <sup>1</sup>H NMR (600 MHz, CDCl<sub>3</sub>) δ 4.73 (d, *J* = 5.6 Hz, 1H), 4.61 (d, *J* = 9.5 Hz, 1H), 4.55 (ddd, *J* = 5.6, 2.2, 1.0 Hz, 1H), 4.39 (dd, *J* = 13.5, 2.2 Hz, 1H), 4.12 (d, *J* = 13.5, 1H), 4.00 (d, *J* = 9.5 Hz, 1H), 1.55 (s, 3H), 1.46 (s, 3H), 1.40 (s, 6H). The <sup>1</sup>H NMR data obtained are consistent with those reported in the literature.<sup>1</sup> <sup>13</sup>C NMR (150 MHz, CDCl<sub>3</sub>) δ 196.94, 113.83, 110.65, 104.14, 77.93, 75.89, 70.02, 60.10, 27.16, 26.52, 26.06, 26.02. The <sup>13</sup>C NMR data obtained are consistent with those reported in the literature.<sup>2</sup> MS (ESI<sup>+</sup>): *m/z* [M+Na]<sup>+</sup> = 281.2.

### The Synthesis of (–)-β-Hydrastine

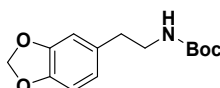

**tert-Butyl (2-(benzo[*d*][1,3]dioxol-5-yl)ethyl)carbamate (7).** NEt<sub>3</sub> (4.0 mL, 30.0 mmol, 1.5 equiv.) and di-*tert*-butyl dicarbonate [(Boc)<sub>2</sub>O] (6.54 g, 30.0 mmol, 1.5 equiv.) were added to a solution of 2-(benzo[*d*][1,3]dioxol-5-yl)ethan-1-amine (**9**) (3.30 g, 20.0 mmol, 1.0 equiv.) in CH<sub>2</sub>Cl<sub>2</sub> (40 mL) at 0 °C. After stirring for 3.0 h at room temperature, the reaction was quenched by addition of brine at 0 °C. The mixture was then extracted with CH<sub>2</sub>Cl<sub>2</sub> (2 × 50 mL). The combined organic layers were washed with a 10% aq. citric acid solution and brine, dried over Na<sub>2</sub>SO<sub>4</sub>, and concentrated *in vacuo*. The residue was purified by stirring with petroleum ether and the solid was filtrated to give *N*-Boc carbamate **7** as a white solid. Yield: 97% (5.16 g). The product was used without further purification in the next step.

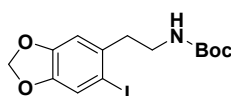

**tert-Butyl (2-(6-iodobenzo[*d*][1,3]dioxol-5-yl)ethyl)carbamate (5).** The *N*-Boc-protected amine **7** (5.16 g, 19.47 mmol, 1.0 equiv.) was suspended together with silver trifluoroacetate (4.4 g, 20.0

mmol, 1.02 equiv.) in CH<sub>2</sub>Cl<sub>2</sub> (200 mL). After the mixture was cooled to - 10 °C, iodine (4.94 g, 19.47 mmol, 1.0 equiv.) was added slowly to maintain the temperature < - 5 °C. After being stirred for 10 min, the mixture was filtrated over Celite, the solution was washed with a saturated aqueous solution of sodium thiosulfate until decolorization and then washed with brine, dried over Na<sub>2</sub>SO<sub>4</sub>, filtered and concentrated under reduced pressure to yield **5** as a white solid. Yield: 84% over two steps (6.37 g). The product was used without further purification in the next step. Mp: 86.7 – 88.6 °C. <sup>1</sup>H NMR (600 MHz, CDCl<sub>3</sub>) δ 7.23 (s, 1H), 6.74 (s, 1H), 5.95 (s, 2H), 4.58 (s, 1H), 3.34 – 3.28 (m, 2H), 2.85 (t, *J* = 6.9 Hz, 2H), 1.44 (s, 9H). <sup>13</sup>C NMR (150 MHz, CDCl<sub>3</sub>) δ 155.84, 148.55, 147.16, 134.93, 118.68, 109.88, 101.59, 87.93, 79.29, 77.25, 77.04, 76.83, 40.67, 28.44. HRMS (ESI<sup>+</sup>): *m/z* calcd. for C<sub>28</sub>H<sub>37</sub>I<sub>2</sub>N<sub>2</sub>O<sub>10</sub> [2M+H]<sup>+</sup> = 783.0639, found 783.0677.

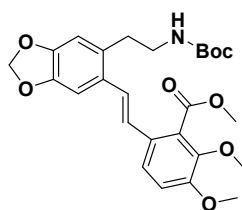

**Methyl (E)-6-(2-(6-(2-((tert-butoxycarbonyl)amino)ethyl) benzo[d][1,3]dioxol-5-yl)vinyl)-2,3-dimethoxybenzoate (4).** A solution of methyl 2,3-dimethoxy-6-vinylbenzoate (**6**) (1.95 g, 8.78 mmol, 1.0 equiv.), *tert*-butyl (2-(6-iodobenzo[d][1,3] dioxol-5-yl)ethyl)carbamate (**5**) (3.6 g, 9.22 mmol, 1.05 equiv.), silver acetate (1.61 g, 9.66 mmol, 1.1 equiv.), and palladium acetate (0.2 g, 0.88 mmol, 0.1 equiv.) in acetic acid (25 mL) was heated at 117 °C for 1.5 h under Ar atmosphere. The resulting dark reaction mixture was poured into water (250 mL), and then extracted with CH<sub>2</sub>Cl<sub>2</sub> (5 × 50 mL). The combined organic layers were washed with sat. NaHCO<sub>3</sub> and brine, dried over Na<sub>2</sub>SO<sub>4</sub>, and concentrated *in vacuo*. Purification of the residue by flash chromatography, eluting with petroleum ether/EtOAc = 10:1 – 5:1 to yield **4** as a light yellow oil. Yield: 76% (3.22 g). <sup>1</sup>H NMR (600 MHz, DMSO-*d*<sub>6</sub>) δ 7.65 (d, *J* = 8.5 Hz, 1H), 7.30 (d, *J* = 15.9 Hz, 1H), 7.13 (d, *J* = 8.8 Hz, 1H), 7.10 (s, 1H), 6.95 (t, *J* = 5.5 Hz, 1H), 6.76 (s, 1H), 6.67 (d, *J* = 15.9 Hz, 1H), 5.99 (s, 1H), 3.88 (s, 1H), 3.86 (s, 2H), 3.74 (s, 2H), 3.08 – 3.01 (m, 1H), 2.76 (t, *J* = 7.5 Hz, 1H), 1.37 (s, 6H). <sup>13</sup>C NMR (150 MHz, DMSO-*d*<sub>6</sub>) δ 167.81, 156.11, 151.88, 147.46, 146.84, 145.55, 132.06, 129.46, 128.48, 127.77, 126.82, 124.17, 122.26, 114.77, 110.50, 105.13, 101.44, 78.09, 61.40, 56.50, 52.84, 46.00, 33.42, 28.72. HRMS (ESI<sup>+</sup>): *m/z* calcd. for C<sub>26</sub>H<sub>32</sub>NO<sub>8</sub> [M+H]<sup>+</sup> = 486.2128, found 486.2101.

**Table S1.** Optimization of Asymmetric Epoxidation of (*E*)-Stilbene **4** for the Acid-Catalyzed Cascade Cyclization

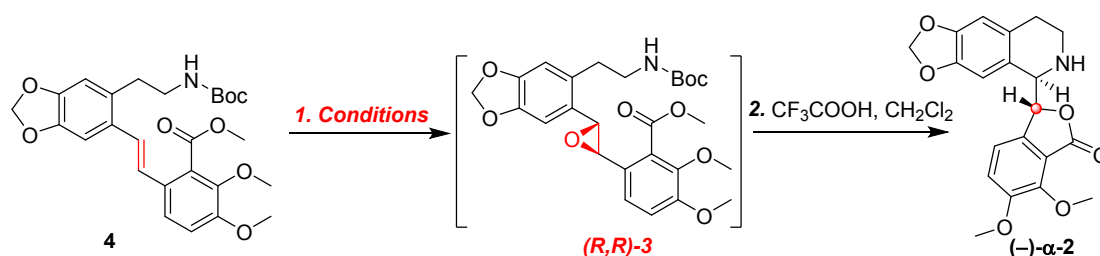

| Entry <sup>a</sup> | Conditions                                                                                                                                                                                                                   | Yield <sup>b</sup><br>(%) | ee <sup>c</sup><br>(%) |
|--------------------|------------------------------------------------------------------------------------------------------------------------------------------------------------------------------------------------------------------------------|---------------------------|------------------------|
| 1                  | Ketone <b>13</b> (3.0 equiv.), Oxone (5.6 equiv.), NaHCO <sub>3</sub> (18.9 equiv.), CH <sub>3</sub> CN-CH <sub>2</sub> Cl <sub>2</sub> -H <sub>2</sub> O (v/v=1:4:5), 0 °C, 48 h                                            | ND                        | –                      |
| 2                  | Ketone <b>13</b> (3.0 equiv.), Oxone (5.0 equiv.), NaHCO <sub>3</sub> (15.5 equiv.), Bu <sub>4</sub> NHSO <sub>4</sub> (5 mol %), CH <sub>3</sub> CN-aq.Na <sub>2</sub> EDTA (4×10 <sup>-4</sup> M) (v/v=1.5:1), 0 °C, 2.0 h | ND                        | –                      |
| 3                  | Ketone <b>13</b> (5.0 equiv.), Oxone (5.0 equiv.), NaHCO <sub>3</sub> (15.5 equiv.), Bu <sub>4</sub> NHSO <sub>4</sub> (5 mol %), CH <sub>3</sub> CN-aq.Na <sub>2</sub> EDTA (4×10 <sup>-4</sup> M) (v/v=1.5:1), 0 °C, 2.0 h | ND                        | –                      |
| 4                  | Ketone <b>13</b> (0.3 equiv.), Oxone (2.02 equiv.), K <sub>2</sub> CO <sub>3</sub> 4.04 equiv.), Bu <sub>4</sub> NHSO <sub>4</sub> (5 mol %), CH <sub>3</sub> CN-DMM-buffer <sup>d</sup> (pH=7.0) (v/v/v=1:2:1), 0 °C, 24 h  | ND                        | –                      |
| 5                  | Ketone <b>13</b> (0.3 equiv.), Oxone (1.38 equiv.), K <sub>2</sub> CO <sub>3</sub> (5.8 equiv.), Bu <sub>4</sub> NHSO <sub>4</sub> (5 mol %), CH <sub>3</sub> CN-DMM-buffer <sup>e</sup> (v/v/v=1:2:2), 0 °C, 1.5 h          | ND                        | –                      |
| 6                  | Ketone <b>13</b> (1.6 equiv.), Oxone (1.6 equiv.), K <sub>2</sub> CO <sub>3</sub> (6.74 equiv.), Bu <sub>4</sub> NHSO <sub>4</sub> (5 mol %), CH <sub>3</sub> CN-DMM-buffer <sup>e</sup> (v/v/v=1:2:2), 0 °C, 1.5 h          | ND                        | –                      |
| 7                  | Ketone <b>13</b> (2.0 equiv.), Oxone (1.6 equiv.), K <sub>2</sub> CO <sub>3</sub> (6.74 equiv.), Bu <sub>4</sub> NHSO <sub>4</sub> (5 mol %), CH <sub>3</sub> CN-DMM-buffer <sup>e</sup> (v/v/v=1:2:2), 0 °C, 1.5 h          | ND                        | –                      |
| 8                  | Ketone <b>13</b> (3.0 equiv.), Oxone (1.6 equiv.), K <sub>2</sub> CO <sub>3</sub> (6.74 equiv.), Bu <sub>4</sub> NHSO <sub>4</sub> (5 mol %), CH <sub>3</sub> CN-DMM-buffer <sup>e</sup> (v/v/v=1:2:2), 0 °C, 1.5 h          | ND                        | –                      |
| 9                  | Ketone <b>13</b> (3.0 equiv.), Oxone (1.6 equiv.), K <sub>2</sub> CO <sub>3</sub> (6.74 equiv.), Bu <sub>4</sub> NHSO <sub>4</sub> (5 mol %), CH <sub>3</sub> CN-DMM-buffer <sup>e</sup> (v/v/v=1:2:2), -10 °C, 2 h          | trace <sup>f</sup>        | –                      |
| 10                 | Ketone <b>13</b> (1.6 equiv.), Oxone (1.6 equiv.), K <sub>2</sub> CO <sub>3</sub> (6.74 equiv.), Bu <sub>4</sub> NHSO <sub>4</sub> (5 mol %), CH <sub>3</sub> CN-DMM-buffer <sup>e</sup> (v/v/v=1:2:2), -10 °C, 2 h          | trace <sup>f</sup>        | –                      |
| 11                 | Ketone <b>13</b> (1.6 equiv.), Oxone (1.38 equiv.), K <sub>2</sub> CO <sub>3</sub> (5.8 equiv.), Bu <sub>4</sub> NHSO <sub>4</sub> (5 mol %), CH <sub>3</sub> CN-DMM-buffer <sup>e</sup> (v/v/v=1:2:2), -10 °C, 2 h          | trace <sup>f</sup>        | –                      |
| 12 <sup>g</sup>    | Ketone <b>13</b> (0.3 equiv.), Oxone (1.38 equiv.), K <sub>2</sub> CO <sub>3</sub> (5.8 equiv.), Bu <sub>4</sub> NHSO <sub>4</sub> (5 mol %), CH <sub>3</sub> CN-buffer <sup>e</sup> (v/v=3:2), 0 °C to rt, 24 h             | trace <sup>f</sup>        | –                      |
| 13                 | Ketone <b>13</b> (3.0 equiv.), Oxone (1.38 equiv.), K <sub>2</sub> CO <sub>3</sub> (5.8 equiv.), Bu <sub>4</sub> NHSO <sub>4</sub> (5 mol %), CH <sub>3</sub> CN-bufer <sup>e</sup> (v/v=3:2), 0 °C to rt, 24 h              | trace <sup>h</sup>        | –                      |
| 14 <sup>i</sup>    | <b>Ketone 13 (3.0 equiv.), Oxone (4.6 equiv.), K<sub>2</sub>CO<sub>3</sub> (18.6 equiv.), Bu<sub>4</sub>NHSO<sub>4</sub> (5 mol %), CH<sub>3</sub>CN-buffer<sup>e</sup> (v/v=3:2, 25 mL), 0 °C 4.5 h</b>                     | 42                        | 86                     |
| 15 <sup>i</sup>    | Ketone <b>13</b> (1.0 equiv.), Oxone (4.6 equiv.), K <sub>2</sub> CO <sub>3</sub> (18.6 equiv.), Bu <sub>4</sub> NHSO <sub>4</sub> (5 mol %), CH <sub>3</sub> CN-buffer <sup>e</sup> (v/v=3:2, 25 mL), 0 °C 8 h              | 24                        | 79                     |
| 16 <sup>j</sup>    | Ketone <b>13</b> (3.0 equiv.), 30% H <sub>2</sub> O <sub>2</sub> (30 equiv.), CH <sub>3</sub> CN-buffer <sup>k</sup> (v/v=2:1), 0 °C 36 h                                                                                    | 25                        | 58                     |
| 17 <sup>j</sup>    | Ketone <b>13</b> (3.0 equiv.), 30% H <sub>2</sub> O <sub>2</sub> (30 equiv.), CH <sub>3</sub> CN-EtOH-CH <sub>2</sub> Cl <sub>2</sub> , (v/v/v=1:1:2), buffer <sup>l</sup> , 0 °C 36 h                                       | 40                        | 71                     |

<sup>a</sup>Substrate **4** (0.1 mmol). <sup>b</sup>Isolated yield of (–)-**α-2**. <sup>c</sup>The enantiomeric excess was determined by chiral HPLC (Chiralpak IH). <sup>d</sup>Buffer: 0.05 M aq.Na<sub>2</sub>HPO<sub>4</sub>-0.05 M aq.KH<sub>2</sub>PO<sub>4</sub>, pH=7.0. <sup>e</sup>Buffer: 0.05 M Na<sub>2</sub>B<sub>4</sub>O<sub>7</sub>•10 H<sub>2</sub>O of aqueous Na<sub>2</sub>EDTA (4×10<sup>-4</sup> M) solution. <sup>f</sup>Most of the starting material was recovered. <sup>g</sup>Substrate **4** (1 mmol). <sup>h</sup>Most of the epoxide (**R,R**)-**3** was decomposed. <sup>i</sup>Substrate **4** (0.3 mmol). <sup>j</sup>Substrate **4** (0.4 mmol). <sup>k</sup>Buffer: 1.0 M K<sub>2</sub>CO<sub>3</sub> in 4×10<sup>-4</sup> M of EDTA. <sup>l</sup>Buffer: 2.0 M K<sub>2</sub>CO<sub>3</sub> in 4×10<sup>-4</sup> M of EDTA.

### General Experimental Procedure for studies summarized in Tables S1 (entries 1-15) and focused on optimizing the formation of [(**R,R**)-**3**].

To a three-neck round-bottom flask were added the mixed solvent (entry 1) or the mixed solvent

and buffer (entries 2-15), compound **4** (0.1 mmol, 1.0 equiv.), tetrabutylammonium hydrogen sulfate (15 mg). The reaction mixture was cooled to 0 °C or –10 °C. Then, the solid Oxone, NaHCO<sub>3</sub>, ketone **13** were added in portions (entry 1) or a solution of Oxone in aqueous Na<sub>2</sub>(EDTA) (4 × 10<sup>-4</sup> M), a solution of K<sub>2</sub>CO<sub>3</sub> in water and a solution of ketone **13** in acetonitrile were added in dropwise through three separate addition funnels. The reaction was stirred for the corresponding reaction time, and monitored by TLC. The crude product (**R,R**)-**3** was directly used for the following acid-catalyzed cascade cyclization. The results were analyzed by chiral HPLC (Chiralpak IH).

**General Experimental Procedure for studies summarized in Tables S1 (entries 16-17) and focused on optimizing the formation of [(R,R)-3].**

To a solution of compound **4** (0.4 mmol, 1.0 equiv.) in the solvent was add the buffer followed by ketone **13** (0.4 mmol, 1.0 equiv.) and 30% H<sub>2</sub>O<sub>2</sub> (4.0 equiv.) at 0 °C. Upon stirring at 0 °C for 12 h, additional ketone **13** (0.4 mmol, 1.0 equiv.) and 30% H<sub>2</sub>O<sub>2</sub> (4.0 equiv.) were added and the mixture was stirred at 0 °C for another 12 h. And then ketone **13** (0.4 mmol, 1.0 equiv.) and 30% H<sub>2</sub>O<sub>2</sub> (4.0 equiv.) were added in again for stirring the last 12 h. The reaction was then monitored by TLC to follow the reaction to completion, and quenched by addition of aq. Na<sub>2</sub>S<sub>2</sub>O<sub>3</sub>. The mixture was extracted with CH<sub>2</sub>Cl<sub>2</sub>, washed with brine, dried over Na<sub>2</sub>SO<sub>4</sub>. The solvent was removed under vacuum to give crude product (**R,R**)-**3**, which was directly used for the next step. The results were analyzed by chiral HPLC (Chiralpak IH).

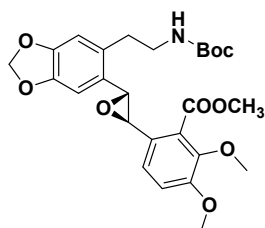

**Methyl 6-((2R,3R)-3-(6-(2-((tert-butoxycarbonyl)amino)-ethyl)benzo[d][1,3]dioxol-5-yl)oxiran-2-yl)-2,3-dimethoxy-benzoate [(R,R)-3].** To a 100 mL three-neck round-bottom flask were added buffer (0.05 M Na<sub>2</sub>B<sub>4</sub>O<sub>7</sub>•10H<sub>2</sub>O in 4 × 10<sup>-4</sup> M aqueous Na<sub>2</sub>(EDTA), 10 mL), acetonitrile (15 mL), compound **4** (120 mg, 0.3 mmol, 1.0 equiv.), tetrabutylammonium hydrogen sulfate (15 mg). The reaction mixture was cooled with an ice bath. A solution of Oxone (0.85 g, 1.38 mmol) in aqueous Na<sub>2</sub>(EDTA) (4 × 10<sup>-4</sup> M, 6.5 mL), a solution of K<sub>2</sub>CO<sub>3</sub> (0.8 g, 5.8 mmol) in water (6.5 mL) and a solution of ketone **13** (0.23 g, 0.9 mmol) in acetonitrile (3.0 mL) were added dropwise through three separate addition funnels over a period of 4.5 h. The reaction was then monitored by TLC to follow the reaction to completion, and quenched by addition of water (20 mL). The mixture was extracted with CH<sub>2</sub>Cl<sub>2</sub> (3 × 20 mL), washed with brine (3 × 20 mL), dried over Na<sub>2</sub>SO<sub>4</sub>. The solvent was removed under vacuum to give crude product (**R,R**)-**3** (≈ 150 mg, ≈ 0.3 mmol, > 95% crude yield), which was directly used for the next step.

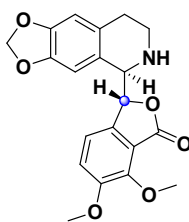

(-)-α-2, threo-form

**(-)-α-N-demethyl Hydrastine [(-)-α-2, threo-form].** To a stirred solution of the above epoxide



**(R,R)-3** ( $\approx 0.3$  mmol) in  $\text{CH}_2\text{Cl}_2$  (30 mL) at  $0^\circ\text{C}$  was added  $\text{CF}_3\text{CO}_2\text{H}$  (0.55 mL, 7.5 mmol, 30 equiv.). Upon stirring at  $0^\circ\text{C}$  for 3.0 h (the epoxide was consumed as judged by TLC), Additional  $\text{CF}_3\text{CO}_2\text{H}$  (2.2 mL, 120.0 mmol,  $4 \times 30$  equiv.) was added to the reaction mixture at  $0^\circ\text{C}$ . After stirring for additional 3.0 h at room temperature, the reaction mixture was concentrated and redissolved in  $\text{CH}_2\text{Cl}_2$  (20 mL) and water (10 mL). The mixture was adjusted to  $\text{pH} = 8.0 - 9.0$  with ammonium hydroxide and then extracted with  $\text{CH}_2\text{Cl}_2$  (20 mL  $\times 3$ ). The combined organic layer was washed with brine (20 mL  $\times 3$ ) and dried over anhydrous  $\text{Na}_2\text{SO}_4$ . The solvent was removed under vacuum to give crude product **(-)- $\alpha$ -2** ( $\approx 110$  mg,  $> 99\%$  crude yield), which was directly used for the next step.

For the analysis, small amounts of the crude **(R,R)-3** (50 mg, 0.1 mmol) were converted to **(-)- $\alpha$ -2** in above conditions and purified by preparative thin layer chromatography (PTLC,  $\text{CH}_2\text{Cl}_2/\text{MeOH} = 100:1$ ) to give **(-)- $\alpha$ -2** (15.4 mg) as a light yellow solid. Yield: 42.1% for two steps, **86% ee** (Chiralpak IH column, *n*-Hexane/Ethanol/Diethylamine = 40:60:0.1, 220 nm, 0.8 mL/min,  $35^\circ\text{C}$ ,  $t_{\text{major}} = 5.537$  min,  $t_{\text{minor}} = 7.569$  min).  $^1\text{H NMR}$  (400 MHz,  $\text{CDCl}_3$ )  $\delta$  7.21 (d,  $J = 8.2$  Hz, 1H), 7.12 (dd,  $J = 8.2, 0.6$  Hz, 1H), 6.71 (s, 1H), 6.56 (s, 1H), 5.90 (dd,  $J = 6.7, 1.4$  Hz, 2H), 5.69 (d,  $J = 2.9$  Hz, 1H), 5.35 (t,  $J = 4.6$  Hz, 1H), 4.42 (d,  $J = 3.0$  Hz, 1H), 4.10 (s, 3H), 3.91 (s, 3H), 3.20 (dt,  $J = 12.0, 5.2$  Hz, 1H), 2.90 (ddd,  $J = 12.2, 7.9, 4.6$  Hz, 1H), 2.83 – 2.66 (m, 1H), 2.60 (dt,  $J = 15.9, 5.0$  Hz, 1H). HRMS (ESI<sup>+</sup>):  $m/z$  calcd. for  $\text{C}_{20}\text{H}_{20}\text{NO}_6$   $[\text{M}+\text{H}]^+ = 370.1291$ , found 370.1277.

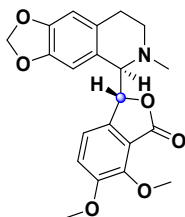

**(-)- $\alpha$ -Hydrastine (threo-form)**

**(-)- $\alpha$ -Hydrastine (threo-form)**. To a stirred solution of the above crude product **(-)- $\alpha$ -2** ( $\approx 0.3$  mmol, 1.0 equiv.) in  $\text{HCOOH}$  (2.5 mL) was added 37%  $\text{HCHO}$  (1.5 mL). After the reaction mixture was heated to reflux and stirred for 30 min (detected by TLC), the reaction mixture was concentrated and the resulting residue was stirred with water ( $\approx 10$  mL) and  $\text{CH}_2\text{Cl}_2$  (20 mL), adjusted to  $\text{pH} = 9.0 - 10.0$  with ammonium hydroxide, and then extracted with  $\text{CH}_2\text{Cl}_2$  (20 mL  $\times 3$ ). The combined organic layer was washed with brine (20 mL  $\times 3$ ) and dried over anhydrous  $\text{Na}_2\text{SO}_4$ . The solvent was removed under vacuum to give crude product **Hydrastine**, which was purified by preparative thin layer chromatography (silica gel), eluting with  $\text{CH}_2\text{Cl}_2/\text{MeOH} = 100:1$  to give **(-)- $\alpha$ -Hydrastine [threo-form]** (28.0 mg) as a white solid. Yield: 29.6% over three steps from compound **4**. Mp:  $153.2 - 155.0^\circ\text{C}$ ,  $[\alpha]_{\text{D}}^{25} = -123.5^\circ$  (c 0.5,  $\text{CH}_2\text{Cl}_2$ ) (lit<sup>1</sup> =  $162.0 - 163.5^\circ\text{C}$ ,  $[\alpha]_{\text{D}}^{25} = -141^\circ$ );  $^1\text{H NMR}$  (600 MHz,  $\text{CDCl}_3$ )  $\delta$  7.27 (d,  $J = 8.2$  Hz, 1H), 7.04 (d,  $J = 8.2$  Hz, 1H), 6.64 (s, 1H), 6.37 (s, 1H), 5.83 (d,  $J = 1.0$  Hz, 1H), 5.78 (s, 1H), 5.55 (d,  $J = 2.8$  Hz, 1H), 4.01 (d,  $J = 2.3$  Hz, 1H), 3.98 (s, 3H), 3.84 (s, 3H), 3.16 – 3.00 (m, 1H), 2.85 – 2.65 (m, 1H), 2.56 (s, 3H), 2.53 (d,  $J = 9.9$  Hz, 1H), 2.46 (d,  $J = 15.6$  Hz, 1H).  $^{13}\text{C NMR}$  (150 MHz,  $\text{CDCl}_3$ )  $\delta$  167.89, 152.24, 147.67, 146.25, 145.78, 140.94, 129.81, 125.10, 119.24, 118.22, 117.99, 108.14, 107.38, 100.74, 80.89, 66.22, 62.30, 56.72, 51.26, 44.93, 29.14. HRMS (ESI<sup>+</sup>):  $m/z$  calcd. for  $\text{C}_{21}\text{H}_{22}\text{NO}_6$   $[\text{M}+\text{H}]^+ = 384.1447$ , found 384.1435.

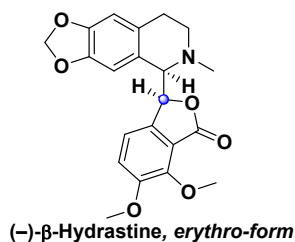

**(-)-α-Hydrastine epimerized to (-)-β-Hydrastine.** To a stirred solution of the above **(-)-α-Hydrastine** (110 mg, 0.3 mmol, 1.0 equiv.) in MeOH (16 mL) was added MeOK (1.33 g, 18.9 mmol, 65.8 equiv.). After the reaction mixture was stirred at room temperature for 22 h (detected by TLC), the reaction mixture was diluted with water (5.0 mL) and concentrated, the resulting residue was adjusted to pH = 2.0 with 2 N HCl at 0 °C, then stirred at room temperature for 30 min. The aqueous layer was adjusted to pH = 9.0 with ammonium hydroxide and then extracted with CH<sub>2</sub>Cl<sub>2</sub> (20 mL × 3). The combined organic layer was washed with brine (20 mL) and dried over anhydrous Na<sub>2</sub>SO<sub>4</sub>. The solvent was removed under vacuum to give crude product **(-)-β-Hydrastine**, which was purified by column chromatography (silica gel), eluting with petroleum ether/EtOAc = 2:1 (0.15% Et<sub>3</sub>N) to give **(-)-β-Hydrastine** (71.0 mg) as a light yellow solid. Yield: 64.5%, **81% ee** (Chiralpak IF column, *n*-Hexane/Ethanol/Diethylamine = 30:70:0.1, 220 nm, 1.0 mL/min, 35 °C, *t*<sub>major</sub> = 5.868 min, *t*<sub>minor</sub> = 7.317 min). Mp: 125.4 – 128.2 °C, [α]<sub>D</sub><sup>25</sup> = – 77.3° (c 0.5, CH<sub>2</sub>Cl<sub>2</sub>) (lit<sup>1</sup> M.p. 132 °C, [α]<sub>D</sub><sup>25</sup> = – 68°). <sup>1</sup>H NMR (600 MHz, CDCl<sub>3</sub>) δ 7.08 (d, *J* = 8.2 Hz, 1H), 6.58 (s, 1H), 6.54 (d, *J* = 8.1 Hz, 1H), 6.36 (s, 1H), 5.91 (dd, *J* = 4.6, 1.4 Hz, 2H), 5.51 (d, *J* = 2.4 Hz, 1H), 4.06 (s, 3H), 4.00 (d, *J* = 3.7 Hz, 1H), 3.89 (s, 3H), 2.92 (t, *J* = 13.1 Hz, 1H), 2.68 – 2.57 (m, 2H), 2.56 (s, 3H), 2.35 – 2.25 (m, 1H). <sup>13</sup>C NMR (150 MHz, CDCl<sub>3</sub>) δ 167.69, 152.54, 148.01, 146.78, 145.78, 140.70, 130.24, 124.46, 119.64, 118.61, 117.63, 108.54, 107.77, 100.87, 82.86, 66.11, 62.33, 56.81, 48.96, 44.74, 26.54. HRMS (ESI<sup>+</sup>): *m/z* calcd. for C<sub>21</sub>H<sub>22</sub>NO<sub>6</sub> [M+H]<sup>+</sup> = 384.1447, found 384.1433.

### The Syntheses of (*E*)-stilbenes 16a-c

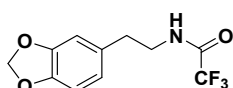

***N*-(2-(benzo[*d*][1,3]dioxol-5-yl)ethyl)-2,2,2-trifluoroacetamide (14a).** NEt<sub>3</sub> (6.0 mL, 45.0 mmol, 2.2 equiv.) was added to a solution of 2-(benzo[*d*][1,3]dioxol-5-yl)ethan-1-amine (**9**) (3.30 g, 20.0 mmol, 1.0 equiv.) in CH<sub>2</sub>Cl<sub>2</sub> (40 mL). After cooling the mixture to - 20 °C, trifluoroacetic anhydride (3.1 mL, 22.0 mmol, 1.1 equiv.) was dropped slowly. After that, the reaction mixture was stirred at - 20 °C for 1.0 and then at room temperature for 3.5 h. After the reaction was complete, the reaction was quenched by addition of water at 0 °C and extracted with CH<sub>2</sub>Cl<sub>2</sub> (2 × 50 mL). The combined organic layers were washed with water, a 10% aq. citric acid solution and brine, dried over Na<sub>2</sub>SO<sub>4</sub>, and concentrated *in vacuo*. The residue was purified by stirring with petroleum ether and the solid was filtrated to give **14a** as a white solid. Yield: 95% (4.96 g). The product was used without further purification in the next step.

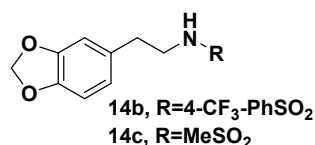

Referring the general procedures for the preparation of **7**, *N*-protected **14b** and **14c** were smoothly synthesized. The crude product **14b** and **14c** were used without further purification in the next step.

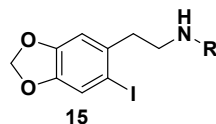

The general procedures for the preparation of **15a**, **15b** and **15c** were as same as those of the preparation of **5**.

**2,2,2-Trifluoro-N-(2-(6-iodobenzo[d][1,3]dioxol-5-yl)ethyl)acetamide (15a)**: White solid, yield: 82.3% over two steps; Mp: 129.6 – 132.8 °C; <sup>1</sup>H-NMR (600 MHz, CDCl<sub>3</sub>) δ 7.25 (s, 1H), 6.72 (s, 1H), 6.34 (s, 1H), 5.98 (s, 2H), 3.58 (q, *J* = 6.8 Hz, 2H), 2.96 (t, *J* = 7.1 Hz, 2H). MS (ESI<sup>+</sup>): *m/z* [M+Na]<sup>+</sup> = 409.9.

**N-(2-(6-iodobenzo[d][1,3]dioxol-5-yl)ethyl)-4-(trifluoromethyl)benzenesulfonamide (15b)**: White solid, yield: 88.0% over two steps; Mp: 121.0 – 122.8 °C; <sup>1</sup>H-NMR (600 MHz, CDCl<sub>3</sub>) δ 7.94 (d, *J* = 8.2 Hz, 2H), 7.75 (d, *J* = 8.3 Hz, 2H), 7.15 (s, 1H), 6.63 (s, 1H), 5.94 (s, 2H), 4.64 (t, *J* = 6.1 Hz, 1H), 3.24 (q, *J* = 6.9 Hz, 2H), 2.85 (t, *J* = 7.0 Hz, 2H). <sup>13</sup>C-NMR (150 MHz, CDCl<sub>3</sub>) δ 148.67, 147.55, 143.58, 134.46, 134.24, 133.20, 127.56, 126.61 – 126.11 (m), 122.33, 118.84, 109.92, 101.77, 87.85, 43.16, 40.43. HRMS (ESI<sup>+</sup>): *m/z* calcd. for C<sub>16</sub>H<sub>12</sub>F<sub>3</sub>INO<sub>4</sub>S [M-H]<sup>-</sup> = 497.9489, found 497.9513.

**N-(2-(6-iodobenzo[d][1,3]dioxol-5-yl)ethyl)methanesulfonamide (15c)**: White solid, yield: 79.0% over two steps; Mp: 132.8 – 134.4 °C; <sup>1</sup>H-NMR (600 MHz, CDCl<sub>3</sub>) δ 7.24 (s, 1H), 6.78 (s, 1H), 5.97 (s, 2H), 4.35 (s, 1H), 3.35 (dd, *J* = 13.6, 6.8 Hz, 2H), 2.94 (t, *J* = 7.0 Hz, 2H), 2.91 (s, 3H). <sup>13</sup>C-NMR (150 MHz, CDCl<sub>3</sub>) δ 148.75, 147.60, 133.57, 118.88, 110.12, 101.79, 87.89, 43.19, 41.03, 40.54. HRMS (ESI<sup>-</sup>): *m/z* calcd. for C<sub>10</sub>H<sub>11</sub>INO<sub>4</sub>S [M-H]<sup>-</sup> = 367.9459, found 367.9464.

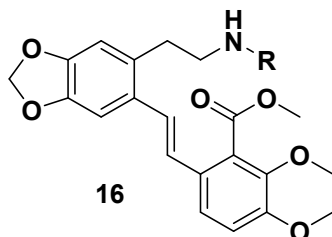

The general procedures for the preparation of **16a**, **16b** and **16c** were as same as those of the preparation of **4**.

**Methyl (E)-2,3-dimethoxy-6-(2-(6-(2-(2,2,2-trifluoroacetamido)ethyl)benzo[d][1,3]dioxol-5-yl)vinyl)benzoate (16a)**: light yellow oil, yield: 67.5%; <sup>1</sup>H-NMR (600 MHz, DMSO-*d*<sub>6</sub>) δ 7.61 (d, *J* = 8.7 Hz, 1H), 7.25 (d, *J* = 15.8 Hz, 1H), 7.19 (d, *J* = 8.8 Hz, 1H), 7.11 (s, 1H), 6.79 (s, 1H), 6.69 (d, *J* = 15.9 Hz, 1H), 6.01 (s, 2H), 3.88 (s, 3H), 3.87 (s, 3H), 3.74 (s, 3H), 3.30 (m, 2H), 2.91 – 2.85 (m, 2H). <sup>13</sup>C-NMR (151 MHz, CDCl<sub>3</sub>) δ 168.43, 157.33 (d, *J* = 36.9 Hz), 152.04, 147.60, 147.23, 146.13, 130.17, 129.36, 128.09, 127.86, 126.30, 125.98, 122.10, 116.76, 114.44 (d, *J* = 126.1 Hz),

109.90, 106.03, 101.26, 61.53, 56.05, 52.52, 40.96, 32.59. MS (ESI<sup>+</sup>):  $m/z$  [M+Na]<sup>+</sup> = 504.3.

**Methyl (E)-2,3-dimethoxy-6-(2-(6-(2-((4-(trifluoromethyl)phenyl)sulfonamido)ethyl)benzo[d][1,3]dioxol-5-yl)vinyl)benzoate (16b):** light yellow oil, yield: 75.0%; <sup>1</sup>H-NMR (600 MHz, CDCl<sub>3</sub>)  $\delta$  7.86 (d,  $J$  = 8.2 Hz, 2H), 7.66 (d,  $J$  = 8.2 Hz, 2H), 7.36 (t,  $J$  = 8.0 Hz, 1H), 7.04 (d,  $J$  = 15.9 Hz, 1H), 6.99 (d,  $J$  = 8.6 Hz, 1H), 6.94 (s, 1H), 6.70 (d,  $J$  = 15.9 Hz, 1H), 6.55 (s, 1H), 5.97 – 5.93 (m, 2H), 4.75 (t,  $J$  = 6.2 Hz, 1H), 3.95 (s, 3H), 3.90 (s, 3H), 3.89 (s, 3H), 3.13 (dd,  $J$  = 13.9, 6.9 Hz, 2H), 2.89 (t,  $J$  = 7.3 Hz, 2H). <sup>13</sup>C-NMR (150 MHz, DMSO-*d*<sub>6</sub>)  $\delta$  167.79, 152.00, 147.44, 146.99, 145.57, 144.74, 132.60, 130.99, 129.50, 128.49, 127.77, 127.60, 126.77 (d,  $J$  = 3.6 Hz), 126.57, 124.68, 122.10, 114.89, 110.67, 105.33, 101.51, 61.37, 56.51, 52.82, 44.16, 33.33. HRMS (ESI<sup>+</sup>):  $m/z$  calcd. for C<sub>28</sub>H<sub>26</sub>F<sub>3</sub>NO<sub>8</sub>Na [M+Na]<sup>+</sup> = 616.1229, found 616.1230.

**Methyl (E)-2,3-dimethoxy-6-(2-(6-(2-(methylsulfonamido)ethyl)benzo[d][1,3]dioxol-5-yl)vinyl)benzoate (16c):** light yellow oil, yield: 73.0%; <sup>1</sup>H-NMR (600 MHz, CDCl<sub>3</sub>)  $\delta$  7.39 (d,  $J$  = 8.6 Hz, 1H), 7.11 (d,  $J$  = 15.9 Hz, 1H), 7.02 (s, 1H), 6.99 (d,  $J$  = 8.6 Hz, 1H), 6.75 (d,  $J$  = 15.8 Hz, 1H), 6.67 (s, 1H), 5.96 (s, 2H), 4.38 (t,  $J$  = 6.7 Hz, 1H), 3.96 (s, 3H), 3.90 (s, 3H), 3.88 (s, 3H), 3.29 (dd,  $J$  = 13.6, 7.0 Hz, 2H), 2.95 (t,  $J$  = 7.2 Hz, 2H), 2.87 (s, 3H). <sup>13</sup>C-NMR (150 MHz, DMSO-*d*<sub>6</sub>)  $\delta$  167.81, 151.95, 147.52, 147.00, 145.55, 131.48, 129.56, 128.48, 127.66, 126.69, 124.59, 122.19, 114.91, 110.70, 105.29, 101.52, 61.40, 56.51, 52.87, 44.21, 33.83. HRMS (ESI<sup>+</sup>):  $m/z$  calcd. for C<sub>22</sub>H<sub>25</sub>NO<sub>8</sub>Na [M+Na]<sup>+</sup> = 486.1199, found 486.1188.

**General procedures for the preparation of racemic model substrates [(±)-17] for the base-catalyzed cascade cyclization.** To the stirred mixture of compound **16** (0.1 mmol, 1.0 equiv), NaHCO<sub>3</sub> (1.89 mmol, 18.9 equiv), H<sub>2</sub>O (2.5 mL), CH<sub>2</sub>Cl<sub>2</sub> (2.0 mL), and acetone (0.5 mL) was added Oxone (0.56 mmol, 5.6 equiv) at 0 °C in portions. The reaction was then monitored by TLC to follow the reaction to completion, quenched with water (3.0 mL), and extracted with CH<sub>2</sub>Cl<sub>2</sub> (5 mL×3). The combined organic layer was then washed with brine (10 mL) and dried over anhydrous Na<sub>2</sub>SO<sub>4</sub>. The solvent was removed under vacuum to give crude product [(±)-17], which was directly used for the next step. *During the isolation process, we found that the epoxides [(±)-17] were prone to decomposition. To address this issue, a two-step procedure was developed in which the epoxidation and cascade cyclizations were performed sequentially with only one isolation operation at the end (Table S2).*

**General Experimental Procedure for studies summarized in Tables S2 and focused on optimizing the formation of [(±)-β-18].**

To a flame dried, N<sub>2</sub> flushed three-neck round-bottom flask, a stir bar and the starting substrate **16** (0.1 mmol) was placed and dissolved in the solvent (2.0 mL) at 0 °C. Then the base was added in dropwise (or in portion). The reaction was stirred for 12 h (unless noted otherwise) at the corresponding reaction temperature.

**Table S2.** Optimization of Racemic Model Substrates [(±)-17] for the Base-Catalyzed Cascade Cyclization

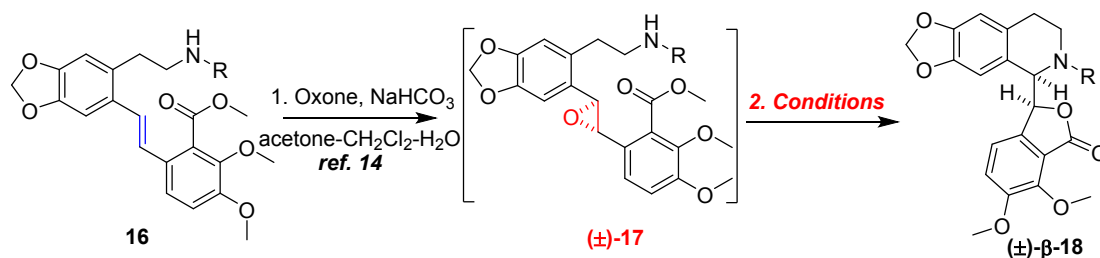

| Entry <sup>a</sup> | 17         | Base (equiv.)        | Solvent        | Temp. (°C)    | T (h)      | Yield <sup>b</sup> (%) |
|--------------------|------------|----------------------|----------------|---------------|------------|------------------------|
| 1                  | <b>17a</b> | 60% NaH (2.5)        | 1,4-Dioxane    | 0 - 65        | 12         | — <sup>c</sup>         |
| 2                  | <b>17a</b> | KHMDS (1.2)          | 1,4-Dioxane    | 0 - 65        | 12         | ND <sup>d</sup>        |
| 3                  | <b>17a</b> | KHMDS (1.2)          | 1,4-Dioxane    | 0 - 84        | 12         | □— <sup>c</sup>        |
| 4                  | <b>17a</b> | KHMDS (1.2)          | dry THF        | 0 - 65        | 12         | ND <sup>d</sup>        |
| 5                  | <b>17a</b> | KHMDS (1.2)          | dry THF        | 0 - rt        | 12         | ND <sup>d</sup>        |
| 6                  | <b>17a</b> | LDA (1.2)            | dry THF        | 0 - 65        | 12         | □— <sup>c</sup>        |
| 7                  | <b>17a</b> | <i>n</i> -BuLi (1.2) | dry THF        | −78 - rt      | 12         | □— <sup>c</sup>        |
| 8                  | <b>17b</b> | KHMDS (1.2)          | dry THF        | 0 - 65        | 12         | 11                     |
| 9                  | <b>17b</b> | KHMDS (1.5)          | 1,4-Dioxane    | 0 - 65        | 12         | 10                     |
| <b>10</b>          | <b>17b</b> | <b>KHMDS (1.5)</b>   | <b>dry THF</b> | <b>0 - 65</b> | <b>5.0</b> | <b>30</b>              |
| 11                 | <b>17c</b> | KHMDS (1.5)          | dry THF        | 0 - 65        | 12         | ND <sup>d</sup>        |
| 12                 | <b>17c</b> | NaHMDS (1.5)         | dry THF        | 0 - 65        | 12         | ND <sup>d</sup>        |
| 13                 | <b>17c</b> | KHMDS (1.5)          | 1,4-Dioxane    | 0 - 84        | 12         | □— <sup>c</sup>        |
| 14                 | <b>17c</b> | 60% NaH (2.5)        | 1,4-Dioxane    | 0 - 65        | 12         | 15                     |
| 15                 | <b>17c</b> | 60% NaH (2.5)        | 1,4-Dioxane    | 0 - 65        | 24         | 10                     |
| 16                 | <b>17c</b> | 60% NaH (2.5)        | 1,4-Dioxane    | 0 - 60        | 12         | 16                     |
| 17                 | <b>17c</b> | 60% NaH (1.5)        | 1,4-Dioxane    | 0 - 60        | 5.0        | 19                     |

<sup>a</sup>The substrate **16** (0.1 mmol) was dissolved in solvent and then the base was added in dropwise. <sup>b</sup>Isolated yield of **(±)-β-18** in two steps. <sup>c</sup>Most of the epoxide **(±)-17** was decomposed. <sup>d</sup>The **(±)-β-18** was not detected by TLC and the epoxide **(±)-17** was recovered. NaHMDS = Sodium bis(trimethylsilyl)amide. KHMDS = Potassium bis(trimethylsilyl)amide. LDA = Lithium diisopropylamide.

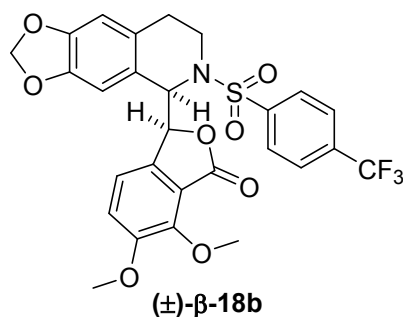

**(±)-β-6,7-dimethoxy-3-(6-((4-(trifluoromethyl)phenyl)sulfonyl)-5,6,7,8-tetrahydro-[1,3]dioxolo [4,5-g]isoquinolin-5-yl)isobenzofuran-1(3H)-one**. To a flame dried, N<sub>2</sub> flushed three-neck round-

bottom flask, a stir bar and the starting substrate **17b** (0.21 g, 0.4 mmol, 1.0 equiv.) was placed and dissolved in dry THF (5.0 mL) at 0 °C. Then the 1.0 M KHMDS (0.6 mL, 0.6 mmol, 1.5 equiv.) was slowly added in dropwise. The reaction mixture was then warmed to 65 °C and stirred for 5 h. After quenching the reaction by saturated ammonium chloride, the reaction mixture was concentrated and the resulting residue was stirred with water ( $\approx$  10 mL) and CH<sub>2</sub>Cl<sub>2</sub> (20 mL), adjusted to pH = 2.0 with 1 N HCl and stirred for 30 min. Then the mixture was adjusted to pH = 9.0 – 10.0 with ammonium hydroxide, and extracted with CH<sub>2</sub>Cl<sub>2</sub> (10 mL  $\times$  3). The combined organic layer was washed with brine (15 mL  $\times$  3) and dried over anhydrous Na<sub>2</sub>SO<sub>4</sub>. The solvent was removed under vacuum to give crude product ( $\pm$ )- **$\beta$ -18b**, which was purified by the flash chromatography (silica gel), eluting with petroleum ether/EtOAc =4:1, to give ( $\pm$ )- **$\beta$ -18b** (60 mg) as a white solid. Yield: 29.9% over two steps. Mp: 154.3 – 156.4 °C; <sup>1</sup>H-NMR (600 MHz, CDCl<sub>3</sub>)  $\delta$  7.91 (d,  $J$  = 8.1 Hz, 2H), 7.70 (d,  $J$  = 8.2 Hz, 2H), 7.24 (d,  $J$  = 8.2 Hz, 1H), 7.09 (d,  $J$  = 8.1 Hz, 1H), 6.44 (s, 1H), 5.90 (s, 1H), 5.85 (d,  $J$  = 1.5 Hz, 1H), 5.83 (d,  $J$  = 1.5 Hz, 1H), 5.74 (d,  $J$  = 3.0 Hz, 1H), 5.34 (d,  $J$  = 2.8 Hz, 1H), 4.00 – 3.96 (m, 3H), 3.93 (s, 3H), 3.62 – 3.56 (m, 1H), 3.49 (ddd,  $J$  = 13.3, 9.5, 5.1 Hz, 1H), 2.76 (dt,  $J$  = 16.3, 4.8 Hz, 1H), 2.55 (ddd,  $J$  = 16.1, 9.4, 6.2 Hz, 1H). HRMS (ESI<sup>+</sup>):  $m/z$  calcd. for C<sub>27</sub>H<sub>22</sub>F<sub>3</sub>NO<sub>8</sub>SNa [M+Na]<sup>+</sup> = 600.0916, found 600.0912.

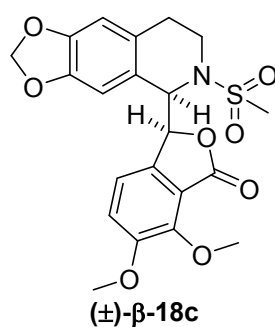

**6,7-dimethoxy-3-(6-(methylsulfonyl)-5,6,7,8-tetrahydro-[1,3]dioxolo[4,5-g]isoquinolin-5-yl)isobenzofuran-1(3H)-one.** To a flame dried, N<sub>2</sub> flushed three-neck round-bottom flask, a stir bar and the starting substrate **17c** (0.17 g, 0.4 mmol, 1.0 equiv.) was placed and dissolved in dry 1,4-dioxane (10.0 mL) at 0 °C. Then the 60% NaH (24 mg, 0.6 mmol, 1.5 equiv.) was slowly added in portion. The reaction mixture was then warmed to 60 °C and stirred for 5 h. After quenching the reaction by saturated ammonium chloride, the reaction mixture was concentrated and the resulting residue was stirred with water ( $\approx$  10 mL) and CH<sub>2</sub>Cl<sub>2</sub> (20 mL), adjusted to pH = 2.0 with 1 N HCl and stirred for 30 min. Then the mixture was adjusted to pH = 9.0 – 10.0 with ammonium hydroxide, and extracted with CH<sub>2</sub>Cl<sub>2</sub> (10 mL  $\times$  3). The combined organic layer was washed with brine (15 mL  $\times$  3) and dried over anhydrous Na<sub>2</sub>SO<sub>4</sub>. The solvent was removed under vacuum to give crude product ( $\pm$ )- **$\beta$ -18c**, which was purified by the flash chromatography (silica gel), eluting with petroleum ether/EtOAc =4:1, to give ( $\pm$ )- **$\beta$ -18c** (30 mg) as a white solid. Yield: 19.2% over two steps. Mp: 190.8 – 196.5 °C; <sup>1</sup>H-NMR (600 MHz, CDCl<sub>3</sub>)  $\delta$  7.15 (d,  $J$  = 8.2 Hz, 1H), 6.74 (d,  $J$  = 8.2 Hz, 1H), 6.61 (s, 1H), 6.23 (s, 1H), 5.91 (s, 2H), 5.72 (d,  $J$  = 3.4 Hz, 1H), 5.34 (d,  $J$  = 3.4 Hz, 1H), 4.04 (s, 3H), 3.90 (s, 3H), 3.68 (ddd,  $J$  = 13.3, 5.6, 3.4 Hz, 1H), 3.00 – 2.94 (m, 1H), 2.93 (s, 3H), 2.87 (ddd,  $J$  = 16.5, 10.6, 6.0 Hz, 1H), 2.69 (dt,  $J$  = 16.3, 3.8 Hz, 1H). <sup>13</sup>C-NMR (150 MHz, CDCl<sub>3</sub>)  $\delta$  167.16, 153.08, 148.51, 147.57, 146.21, 139.02, 128.63, 121.82, 119.03, 118.61, 117.57, 109.22, 106.80, 101.19, 82.30, 62.39, 57.99, 56.78, 40.69, 40.03, 27.74. HRMS (ESI<sup>+</sup>):  $m/z$  calcd. for C<sub>21</sub>H<sub>21</sub>NO<sub>8</sub>SNa [M+Na]<sup>+</sup> = 470.0886, found 470.0880.

## The Synthesis of (*S,S*)-Catalyst *ent-13*

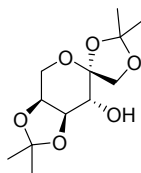

**1,2:4,5-Di-*O*-isopropylidene-L-psicopyranose (*ent-14*).** To the L-fructose (2.2 g, 12.2 mmol) in acetone (100 mL) was added concentrated H<sub>2</sub>SO<sub>4</sub> (70  $\mu$ L, 1.2 mmol) under N<sub>2</sub> after cooling to 0 °C. The resulting reaction mixture was stirred overnight at 25 °C. After neutralizing with 10% NaOH/H<sub>2</sub>O, the reaction mixture was concentrated to a solid, which was then dissolved in CH<sub>2</sub>Cl<sub>2</sub> (50 mL). The resulting solution was washed with water (25 mL) and brine (3  $\times$  15 mL), dried over anhydrous Na<sub>2</sub>SO<sub>4</sub>, filtered, and concentrated to give a white solid. After recrystallization in *n*-hexane - CH<sub>2</sub>Cl<sub>2</sub> (4:1, v/v), alcohol *ent-14* (1.71 g) was obtained as white needles. Yield: 54.8%; Mp: 116.4 – 117.8 °C,  $[\alpha]_D^{25} = +141.08^\circ$  (c 0.314, acetone) [lit<sup>[3]</sup> M.p. 115 – 116 °C,  $[\alpha]_D^{25} = \square 142.4^\circ$  (c 1.05, CHCl<sub>3</sub>)]; <sup>1</sup>H-NMR (600 MHz, CDCl<sub>3</sub>)  $\delta$  4.22 (dd,  $J = 5.8, 2.1$  Hz, 1H), 4.19 (d,  $J = 8.8$  Hz, 1H), 4.15 – 4.10 (m, 2H), 4.01 (d,  $J = 13.4$  Hz, 1H), 3.99 (d,  $J = 8.8$  Hz, 1H), 3.67 (d,  $J = 6.9$  Hz, 1H), 1.94 (brs, 1H), 1.54 (s, 3H), 1.52 (s, 3H), 1.45 (s, 3H), 1.37 (s, 3H); <sup>13</sup>C-NMR (150 MHz, CDCl<sub>3</sub>)  $\delta$  111.84, 109.44, 104.50, 77.30, 73.31, 72.34, 70.43, 60.75, 27.94, 26.45, 26.24, 25.95; HRMS (ESI<sup>+</sup>):  $m/z$  calcd for C<sub>12</sub>H<sub>20</sub>O<sub>6</sub>Na [M+Na]<sup>+</sup> = 283.1158, found 283.1158.

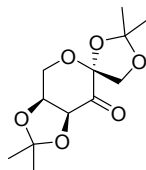

**1,2:4,5-Di-*O*-isopropylidene-L-erythro-2,3-hexodiuro-2,6-pyranose (*ent-13*).** Compound *ent-14* (8.93 g, 34.4 mmol), Et<sub>3</sub>BzNCl (0.78 g, 3.4 mmol), NaIO<sub>4</sub> (11.02 g, 51.5 mmol), and K<sub>2</sub>CO<sub>3</sub> (0.71 g, 5.2 mmol) were vigorously stirred in a mixture of 35 mL of CHCl<sub>3</sub> and 35 mL of H<sub>2</sub>O. RuCl<sub>3</sub> monohydrate (0.77 g, 3.4 mmol) were added, and the reaction mixture was heated at 70 °C. 2-Propanol (12 mL) was added after 2 h, and the suspension was further stirred for 2 h. The reaction mixture was filtered through a Celite pad, and this material was washed with CH<sub>2</sub>Cl<sub>2</sub> (3  $\times$  20 mL). This solution was mixed with the filtrate, the organic layer was separated, and the aqueous layer was extracted with CH<sub>2</sub>Cl<sub>2</sub> (2  $\times$  20 mL). The combined organic extracts were washed with saturated Na<sub>2</sub>SO<sub>3</sub> (130 mL), brine (100 mL), and water (100 mL). The white solid was obtained after drying and evaporating the solvents. Purification of the crude product by flash chromatography, eluting with *n*-hexane - CH<sub>2</sub>Cl<sub>2</sub> (4:1, v/v) to yield *ent-13* as a white acicular solid. Yield: 57.5% (5.1 g). Mp: 98.1 – 100.0 °C,  $[\alpha]_D^{25} = +113.7^\circ$  (c 1.0, CHCl<sub>3</sub>); <sup>1</sup>H-NMR (600 MHz, CDCl<sub>3</sub>)  $\delta$  4.73 (d,  $J = 5.6$  Hz, 1H), 4.61 (d,  $J = 9.5$  Hz, 1H), 4.57 – 4.53 (m, 1H), 4.39 (dd,  $J = 13.5, 2.1$  Hz, 1H), 4.12 (d,  $J = 13.5$  Hz, 1H), 4.00 (d,  $J = 9.5$  Hz, 1H), 1.55 (s, 3H), 1.46 (s, 3H), 1.40 (s, 6H); <sup>13</sup>C-NMR (150 MHz, CDCl<sub>3</sub>)  $\delta$  196.94, 113.82, 110.64, 104.13, 77.93, 75.88, 70.01, 60.09, 27.15, 26.52, 26.06, 26.01. MS (ESI<sup>+</sup>):  $m/z$  [M+Na]<sup>+</sup> = 280.8.

## The Synthesis of the Phthalide Tetrahydroisoquinoline Core of (-)- $\beta$ -Hydrastine in Method B

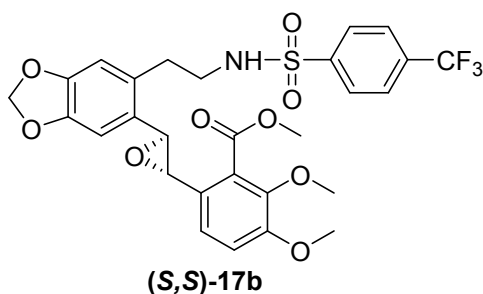

*methyl 2,3-dimethoxy-6-((2S,3S)-3-(6-(2-((4-(trifluoromethyl)phenyl)sulfonamido)ethyl)benzo[d][1,3]dioxol-5-yl)oxiran-2-yl)benzoate [(S,S)-17b]*. To a 100 mL three-neck round-bottom flask were added buffer (0.05 M Na<sub>2</sub>B<sub>4</sub>O<sub>7</sub>•10H<sub>2</sub>O in 4 × 10<sup>-4</sup> M aqueous Na<sub>2</sub>(EDTA), 10 mL), acetonitrile (15 mL), compound **16b** (150 mg, 0.3 mmol, 1.0 equiv.), tetrabutylammonium hydrogen sulfate (15 mg). The reaction mixture was cooled with an ice bath. A solution of Oxone (0.85 g, 1.38 mmol) in aqueous Na<sub>2</sub>(EDTA) (4 × 10<sup>-4</sup> M, 6.5 mL), a solution of K<sub>2</sub>CO<sub>3</sub> (0.8 g, 5.8 mmol) in water (6.5 mL) and a solution of ketone *ent*-**13** (0.23 g, 0.9 mmol) in acetonitrile (3.0 mL) were added dropwise through three separate addition funnels over a period of 4.5 h. The reaction was then monitored by TLC to follow the reaction to completion, and quenched by addition of water (20 mL). The mixture was extracted with CH<sub>2</sub>Cl<sub>2</sub> (3 × 20 mL), washed with brine (3 × 20 mL), dried over Na<sub>2</sub>SO<sub>4</sub>. The solvent was removed under vacuum to give crude product **(S,S)-17b**, which was directly used for the next step.

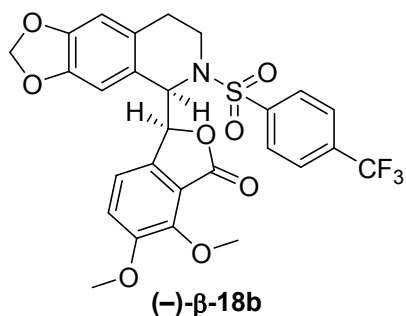

*(S)-6,7-dimethoxy-3-((R)-6-((4-(trifluoromethyl)phenyl)sulfonyl)-5,6,7,8-tetrahydro-[1,3]dioxolo[4,5-g]isoquinolin-5-yl)isobenzofuran-1(3H)-one*. To a flame dried, N<sub>2</sub> flushed three-neck round-bottom flask, a stir bar and the starting substrate **17b** ( $\approx$ 0.3 mmol, 1.0 equiv.) was placed and dissolved in dry THF (5.0 mL) at 0 °C. Then the 1.0 M KHMDS (0.45 mL, 0.45 mmol, 1.5 equiv.) was slowly added in dropwise. The reaction mixture was then warmed to 65 °C and stirred for 5 h. After quenching the reaction by saturated ammonium chloride, the reaction mixture was concentrated and the resulting residue was stirred with water ( $\approx$  10 mL) and CH<sub>2</sub>Cl<sub>2</sub> (20 mL), adjusted to pH = 2.0 with 1 N HCl and stirred for 30 min. Then the mixture was adjusted to pH = 9.0 – 10.0 with ammonium hydroxide, and extracted with CH<sub>2</sub>Cl<sub>2</sub> (10 mL × 3). The combined organic layer was washed with brine (15 mL × 3) and dried over anhydrous Na<sub>2</sub>SO<sub>4</sub>. The solvent was removed under vacuum to give crude product **(-)- $\beta$ -18b**, which was purified by the flash chromatography (silica gel), eluting with petroleum ether/EtOAc =4:1, to give **(-)- $\beta$ -18b** (12 mg) as a white solid. Yield: 8.3% (29.5% brsm) over two steps, **78% ee** (Chiralpak IA column, *n*-



Hexane/Ethanol/Diethylamine = 70:30:0.1, 254 nm, 1.0 mL/min, 35 °C,  $t_{\text{major}} = 3.694$  min,  $t_{\text{minor}} = 8.726$  min).  $^1\text{H-NMR}$  (600 MHz,  $\text{CDCl}_3$ )  $\delta$  7.91 (d,  $J = 8.3$  Hz, 2H), 7.69 (d,  $J = 8.4$  Hz, 2H), 7.23 (d,  $J = 8.2$  Hz, 1H), 7.08 (d,  $J = 8.2$  Hz, 1H), 6.44 (s, 1H), 5.90 (s, 1H), 5.84 (dd,  $J = 13.1, 1.3$  Hz, 2H), 5.74 (d,  $J = 2.8$  Hz, 1H), 5.34 (d,  $J = 2.9$  Hz, 1H), 3.98 (s, 3H), 3.92 (s, 3H), 3.67 – 3.55 (m, 1H), 3.55 – 3.44 (m, 1H), 2.76 (dt,  $J = 16.4, 4.8$  Hz, 1H), 2.56 (ddd,  $J = 15.7, 9.1, 6.2$  Hz, 1H).  $^{13}\text{C-NMR}$  (150 MHz,  $\text{CDCl}_3$ )  $\delta$  166.76, 153.10, 148.59, 147.56, 145.81, 143.13, 139.10, 134.49 (d,  $J = 33.1$  Hz), 127.67, 126.26 (dd,  $J = 7.3, 3.3$  Hz), 126.26 (dd,  $J = 7.3, 3.3$  Hz), 123.13 (d,  $J = 273.4$  Hz), 121.20, 119.11, 118.47, 117.26, 108.87, 106.91, 101.11, 83.16, 62.41, 59.46, 56.82, 41.10, 27.02; HRMS (ESI<sup>+</sup>):  $m/z$  calcd. for  $\text{C}_{27}\text{H}_{22}\text{F}_3\text{NO}_8\text{SNa}$   $[\text{M}+\text{Na}]^+ = 600.0916$ , found 600.0907.

**Table S3.** Attempts to the Optimization of the Reaction Conditions for *N*-Deprotection of (–)- **$\beta$ -18b**

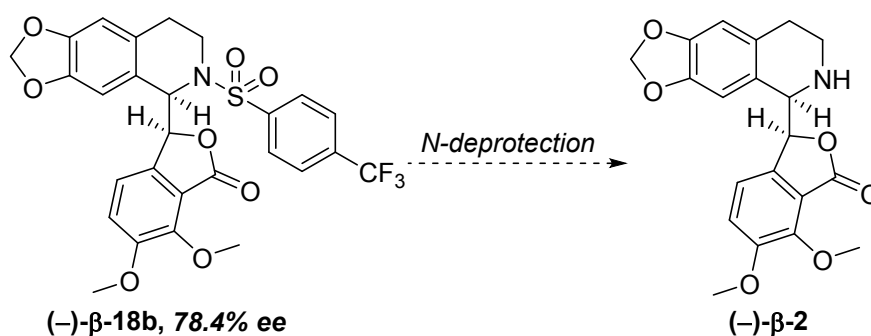

| Entry <sup>a</sup> | Conditions                                               | Yield <sup>b</sup> (%) |
|--------------------|----------------------------------------------------------|------------------------|
| 1                  | Mg, MeOH, Sonication, rt, 1.0 h                          | ND <sup>c</sup>        |
| 2                  | Mg, NH <sub>4</sub> Cl, MeOH, THF, Sonication, 3.0 h, rt | ND <sup>c</sup>        |
| 3                  | SmI <sub>2</sub> , THF, 0 °C – rt, 12 h                  | ND <sup>c</sup>        |
| 4                  | Na naphthalide, THF, 2 h, –78 °C                         | ND <sup>c</sup>        |

<sup>a</sup>The substrate (–)- **$\beta$ -18b** (15 mg). <sup>b</sup>Isolated yield of (–)- **$\beta$ -2**. <sup>c</sup>The (–)- **$\beta$ -2** was not detected by TLC and the substrate (–)- **$\beta$ -18b** was decomposed.

### 3. Natural Product Spectra Comparisons

(-)- $\alpha$ -Hydrastine  $^1\text{H}$  NMR spectra comparison:

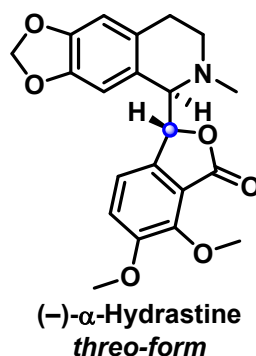

| Lit <sup>4</sup> data<br>[( $\pm$ )- $\alpha$ -Hydrastine, 270 MHz] | Our synthetic data<br>(600 MHz, CDCl <sub>3</sub> )      | $\Delta\delta$ (ppm) |
|---------------------------------------------------------------------|----------------------------------------------------------|----------------------|
| 7.04, 7.29 (AB type, $J = 8.3$ Hz, each 1H)                         | 7.27 (d, $J = 8.2$ Hz, 1H)<br>7.04 (d, $J = 8.2$ Hz, 1H) | 0.02<br>0            |
| 6.65 (s, 1H)                                                        | 6.64 (s, 1H)                                             | 0.01                 |
| 6.37 (s, 1H)                                                        | 6.37 (s, 1H)                                             | 0                    |
| 5.78, 5.83 (each d, $J = 1.3$ Hz, each 1H)                          | 5.83 (d, $J = 1.0$ Hz, 1H)<br>5.78 (d, $J = 1.0$ Hz, 1H) | 0<br>0               |
| 5.54 (d, $J = 3.3$ Hz, 1H)                                          | 5.55 (d, $J = 2.8$ Hz, 1H)                               | 0.01                 |
| 4.00, (d, $J = 3.3$ Hz, 1H)                                         | 4.01 (d, $J = 2.3$ Hz, 1H)                               | 0.01                 |
| 3.98 (s, 3H)                                                        | 3.98 (s, 3H)                                             | 0                    |
| 3.84 (s, 3H)                                                        | 3.84 (s, 3H)                                             | 0                    |
| 3.00-3.10 (m, 1H)                                                   | 3.0-3.16 (m, 1H)                                         | - <sup>a</sup>       |
|                                                                     | 2.85 – 2.65 (m, 1H)                                      | - <sup>a</sup>       |
| 2.40-2.80 (m, 3H)                                                   | 2.53 (d, $J = 9.9$ Hz, 1H)                               | - <sup>a</sup>       |
|                                                                     | 2.46 (d, $J = 15.6$ Hz, 1H)                              | - <sup>a</sup>       |
| 2.55 (s, 3H)                                                        | 2.56 (s, 3H)                                             | 0.01                 |

<sup>a</sup>These three resonances did not perfectly match with the reported values.<sup>4</sup> We believe this difference might be due to the better resolution obtained by acquiring our  $^1\text{H}$  NMR spectrum on a 600 MHz NMR instrument.

**(-)- $\alpha$ -Hydrastine  $^{13}\text{C}$  NMR spectra comparison:**

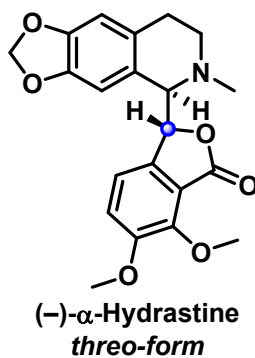

| <b>Lit<sup>5</sup> data</b> | <b>Our synthetic data<br/>(150 MHz, CDCl<sub>3</sub>)</b> | <b><math>\Delta\delta</math> (ppm)</b> |
|-----------------------------|-----------------------------------------------------------|----------------------------------------|
| 168.0                       | 167.89                                                    | 0.11                                   |
| 152.3                       | 152.24                                                    | 0.06                                   |
| 147.6                       | 147.67                                                    | 0.07                                   |
| 146.3                       | 146.25                                                    | 0.05                                   |
| 145.8                       | 145.78                                                    | 0.02                                   |
| 141.1                       | 140.94                                                    | 0.06                                   |
| 130.0                       | 129.81                                                    | 0.19                                   |
| 125.3                       | 125.10                                                    | 0.20                                   |
| 119.3                       | 119.24                                                    | 0.06                                   |
| 118.4                       | 118.22                                                    | 0.18                                   |
| 118.1                       | 117.99                                                    | 0.11                                   |
| 108.2                       | 108.14                                                    | 0.06                                   |
| 107.4                       | 107.38                                                    | 0.02                                   |
| 100.7                       | 100.74                                                    | 0.04                                   |
| 81.8                        | 80.89                                                     | 0.09                                   |
| 66.2                        | 66.22                                                     | 0.02                                   |
| 62.2                        | 62.30                                                     | 0.10                                   |
| 56.7                        | 56.72                                                     | 0.02                                   |
| 51.3                        | 51.26                                                     | 0.04                                   |
| 44.9                        | 44.93                                                     | 0.03                                   |
| 29.2                        | 29.14                                                     | 0.06                                   |

**(-)- $\beta$ -Hydrastine  $^1\text{H}$  NMR spectra comparison:**

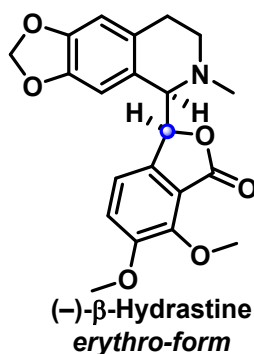

| <b>Lit<sup>5</sup> data<br/>(270 MHz)</b> | <b>Our synthetic data<br/>(600 MHz, CDCl<sub>3</sub>)</b> | <b><math>\Delta\delta</math> (ppm)</b> |
|-------------------------------------------|-----------------------------------------------------------|----------------------------------------|
| 7.08 (1H)                                 | 7.08 (d, $J = 8.3$ Hz, 1H)                                | 0                                      |
| 6.52 (1H)                                 | 6.54 (d, $J = 8.2$ Hz, 1H)                                | 0.02                                   |
| 6.58 (s, 1H)                              | 6.58 (s, 1H)                                              | 0                                      |
| 6.40 (s, 1H)                              | 6.36 (s, 1H)                                              | 0.04                                   |
| 5.91 (s, 2H)                              | 5.91 (dd, 2H)                                             | <sup>a</sup>                           |
| 5.48 (d, 1H)                              | 5.51 (d, 1H)                                              | 0.03                                   |
| 4.06 (s, 3H)                              | 4.06 (s, 3H)                                              | 0                                      |
| 3.98 (d, 1H)                              | 4.00 (d, $J = 3.7$ Hz, 1H)                                | 0.02                                   |
| 3.89 (s, 3H)                              | 3.89 (s, 3H)                                              | 0                                      |
| 2.85-2.94 (m, 1H)                         | 2.92 (t, 1H)                                              | <sup>a</sup>                           |
| 2.42-2.65 (m, 2H)                         | 2.68-2.57 (m, 2H)                                         | 0                                      |
| 2.55 (s, 3H)                              | 2.56 (s, 3H)                                              | 0.01                                   |
| 2.22-2.32 (m, 1H)                         | 2.35 – 2.25 (m, 1H)                                       | 0                                      |

<sup>a</sup>These two resonances did not perfectly match with the reported values.<sup>5</sup> We believe this difference might be due to the better resolution obtained by acquiring our  $^1\text{H}$  NMR spectrum on a 600 MHz NMR instrument.

(-)- $\beta$ -Hydrastine  $^{13}\text{C}$  NMR spectra comparison:

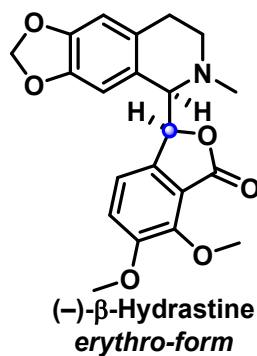

| Lit <sup>5</sup> data | Our synthetic data<br>(150 MHz, $\text{CDCl}_3$ ) | $\Delta\delta$ (ppm) |
|-----------------------|---------------------------------------------------|----------------------|
| 167.0                 | 167.69                                            | 0.69                 |
| 152.6                 | 152.54                                            | 0.06                 |
| 147.5                 | 148.01                                            | 0.51                 |
| 146.3                 | 146.78                                            | 0.48                 |
| 145.4                 | 145.78                                            | 0.38                 |
| 140.4                 | 140.70                                            | 0.30                 |
| 130.0                 | 130.24                                            | 0.24                 |
| 124.5                 | 124.46                                            | 0.04                 |
| 119.4                 | 119.64                                            | 0.24                 |
| 118.5                 | 118.61                                            | 0.11                 |
| 117.3                 | 117.63                                            | 0.33                 |
| 108.1                 | 108.54                                            | 0.44                 |
| 107.3                 | 107.77                                            | 0.47                 |
| 100.4                 | 100.87                                            | 0.47                 |
| 82.7                  | 82.86                                             | 0.16                 |
| 66.0                  | 66.11                                             | 0.11                 |
| 62.0                  | 62.33                                             | 0.33                 |
| 56.7                  | 56.81                                             | 0.11                 |
| 49.0                  | 48.96                                             | 0.04                 |
| 44.7                  | 44.74                                             | 0.04                 |
| 26.7                  | 26.54                                             | 0.16                 |

#### 4. Copies of $^1\text{H}$ and $^{13}\text{C}$ -NMR Spectra, HRMS (or MS) and HPLC Spectra

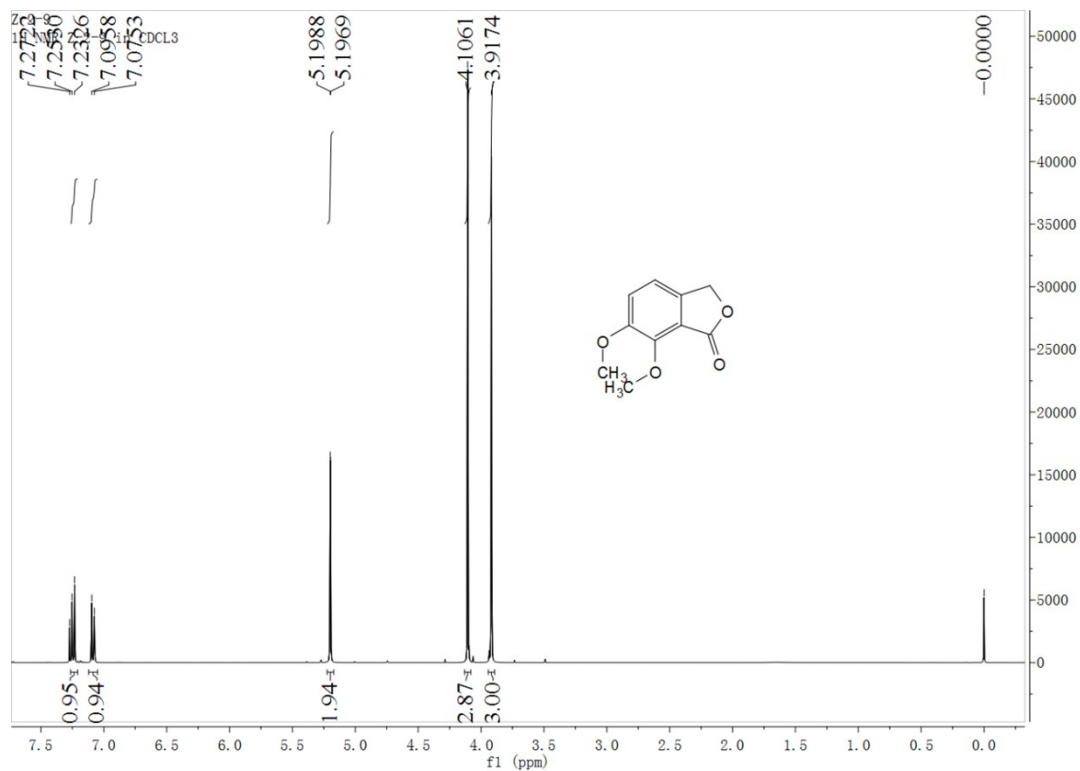

$^1\text{H}$  NMR (600 MHz,  $\text{DMSO}-d_6$ ) spectrum for compound 10

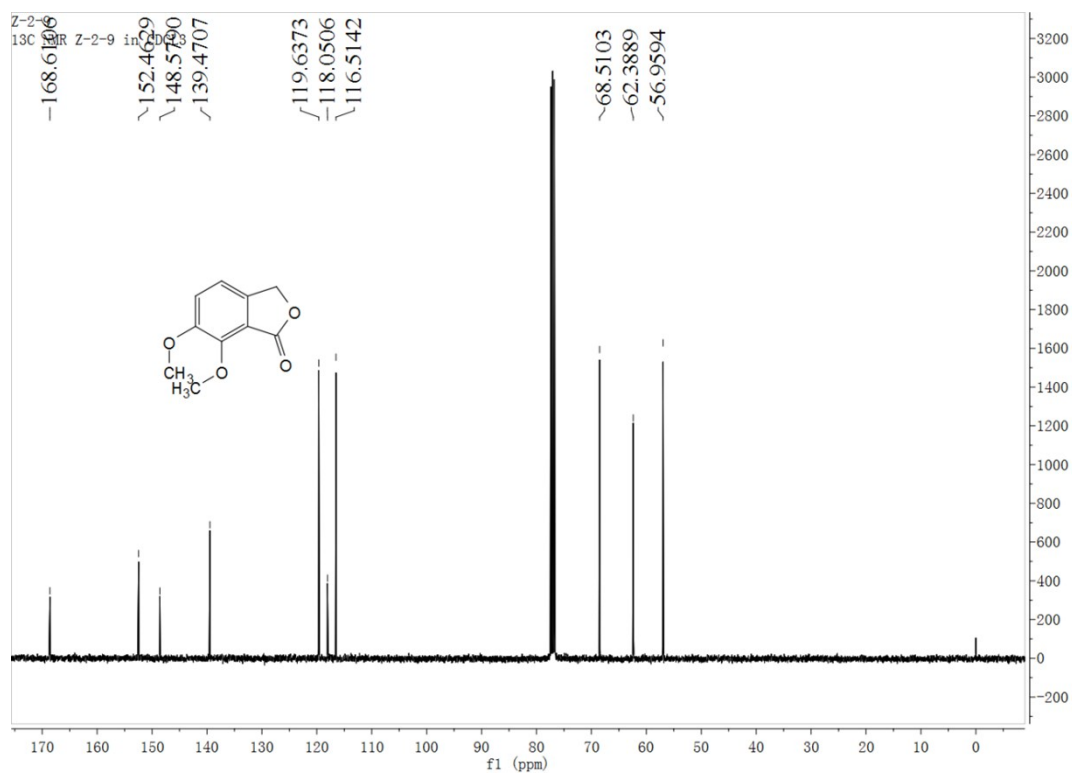

$^{13}\text{C}$  NMR (100 MHz,  $\text{CDCl}_3$ ) spectrum for compound 10

## User Spectra

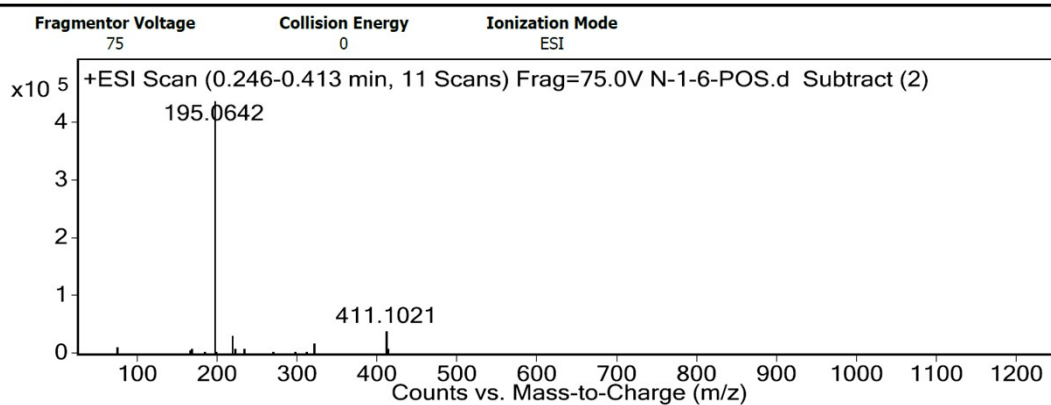

### HRMS for compound 10

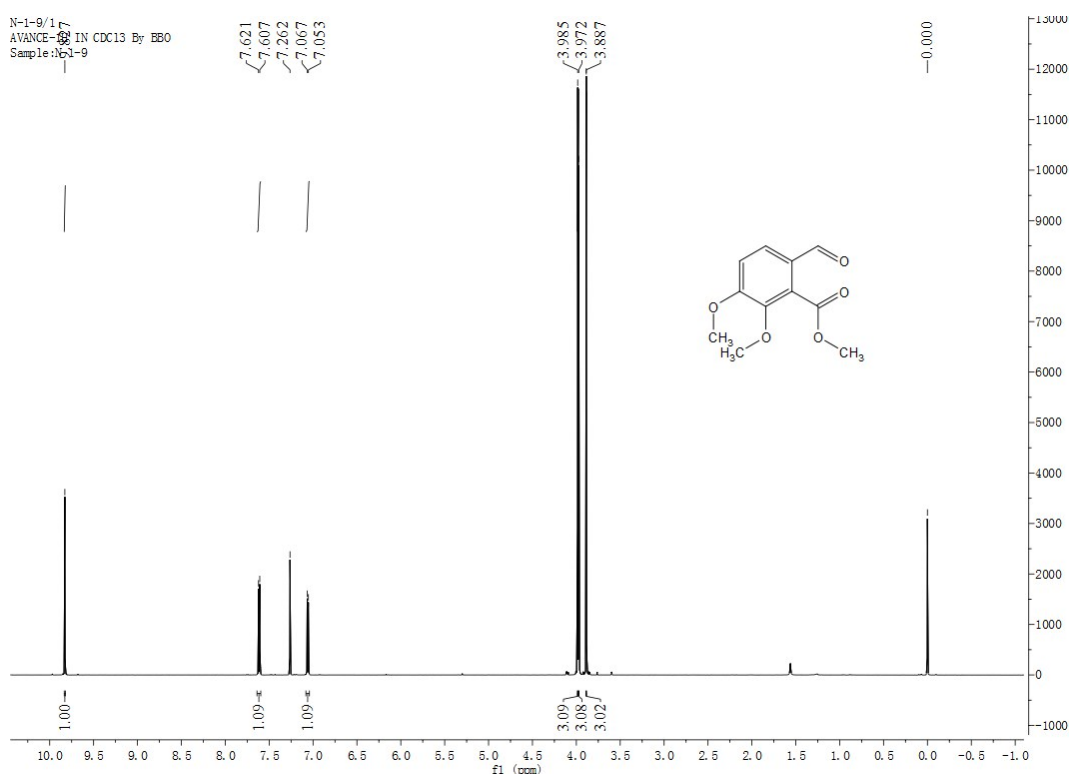

### <sup>1</sup>H NMR (600 MHz, CDCl<sub>3</sub>) spectrum for compound 12

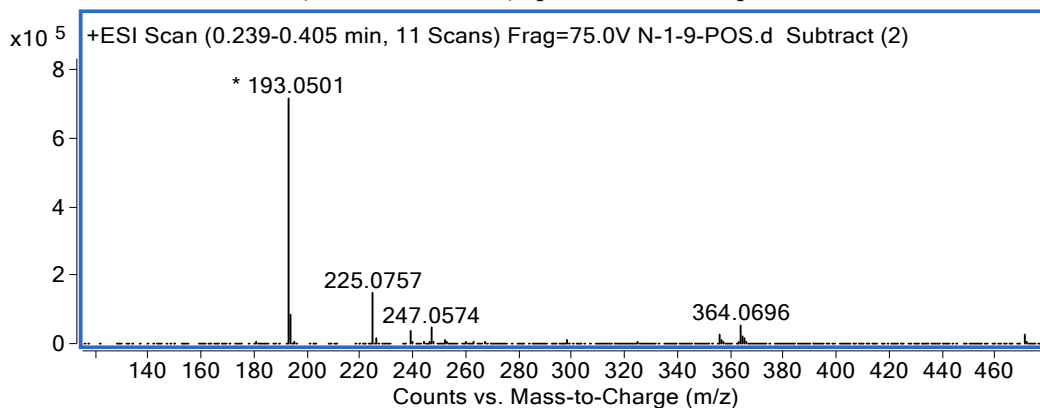

### HRMS for compound 12

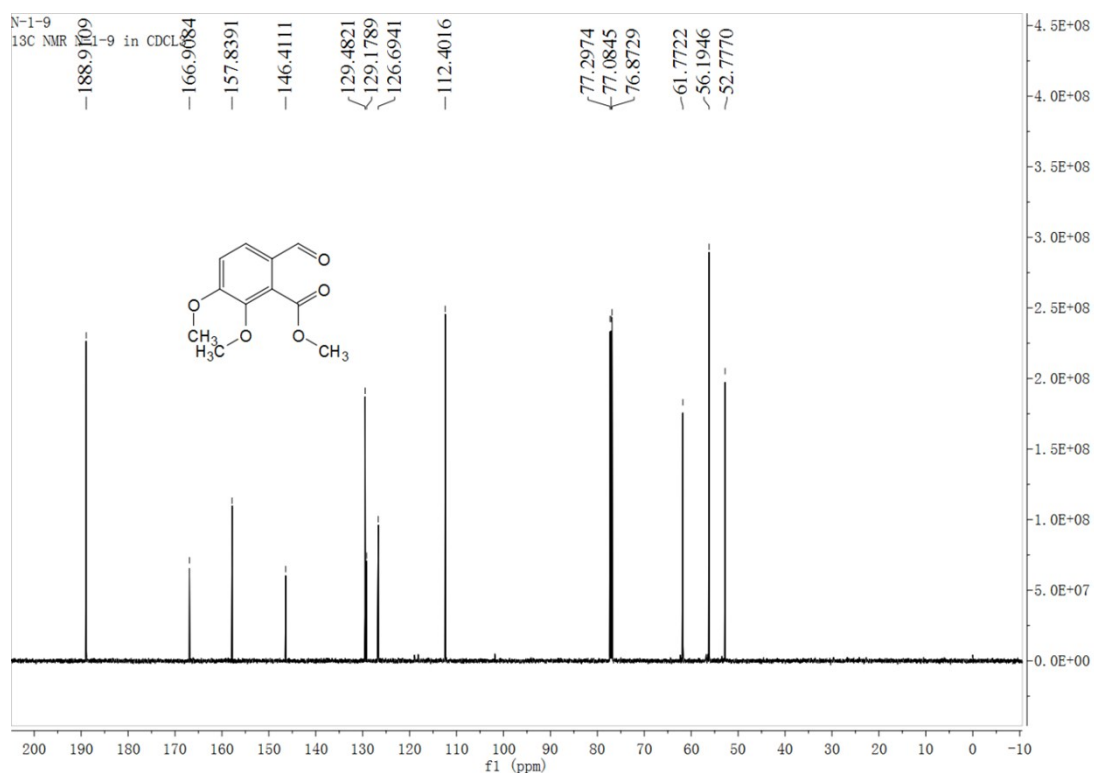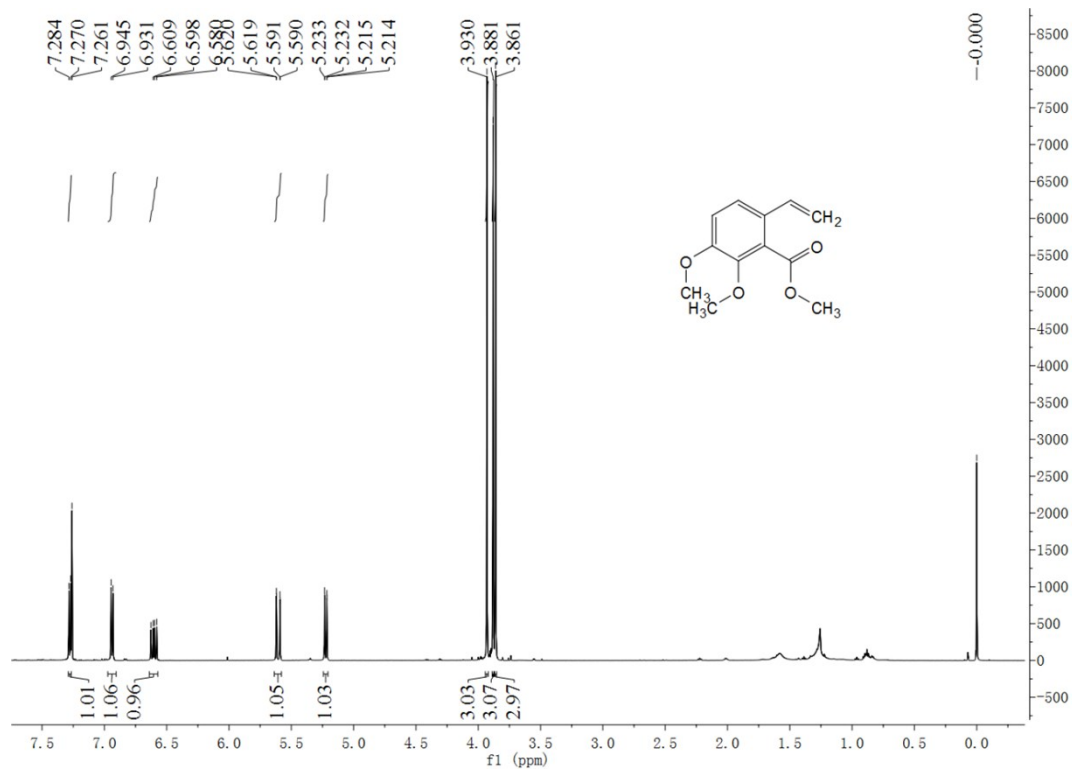



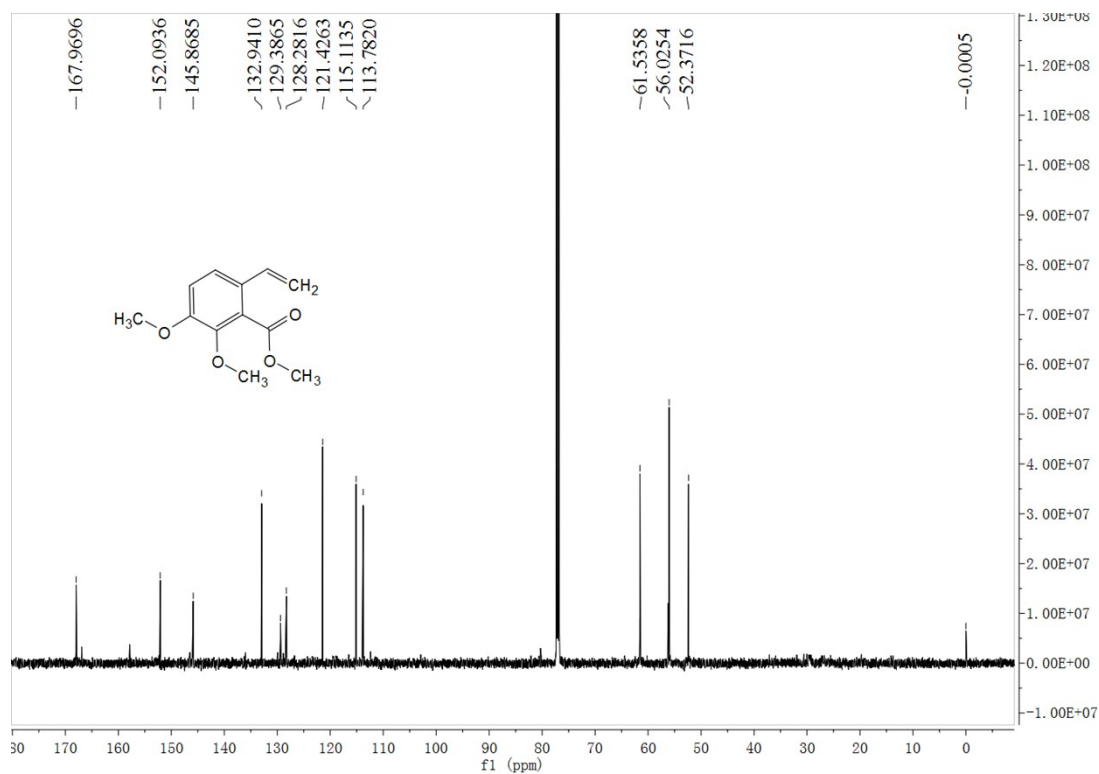

**<sup>13</sup>C NMR (150 MHz, CDCl<sub>3</sub>) spectrum for compound 6**

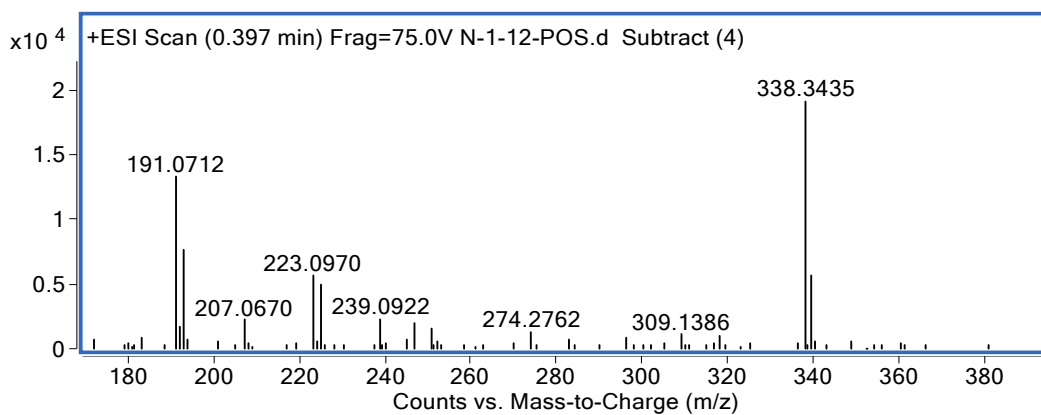

**HRMS for compound 6**

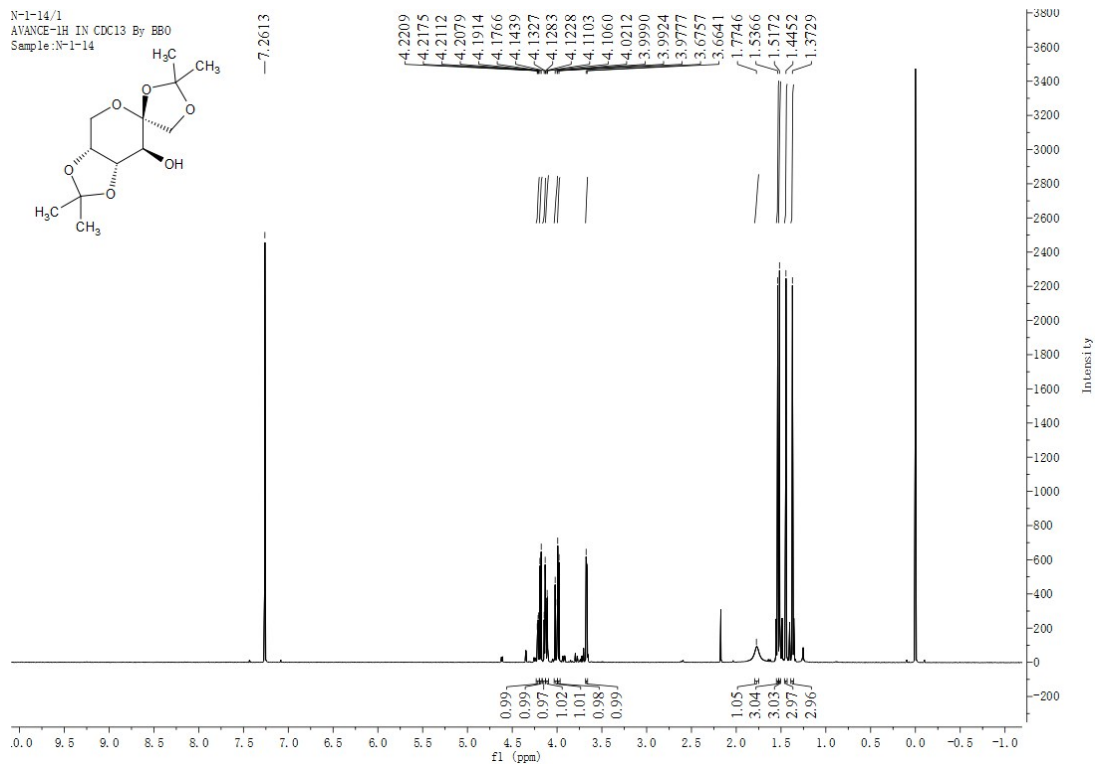

**<sup>1</sup>H-NMR (600 MHz, CDCl<sub>3</sub>) spectrum for 14**

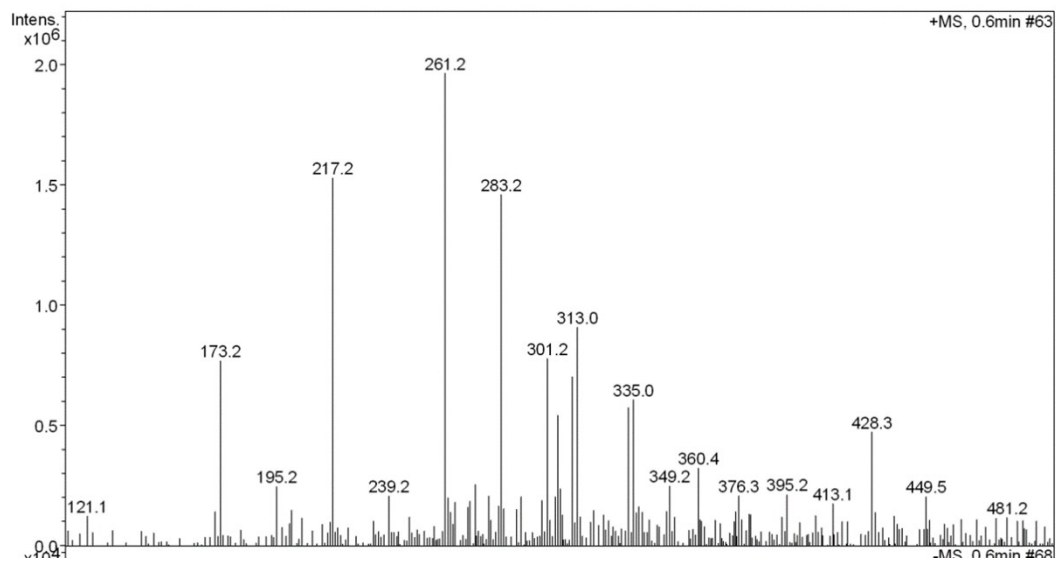

**MS for 14**

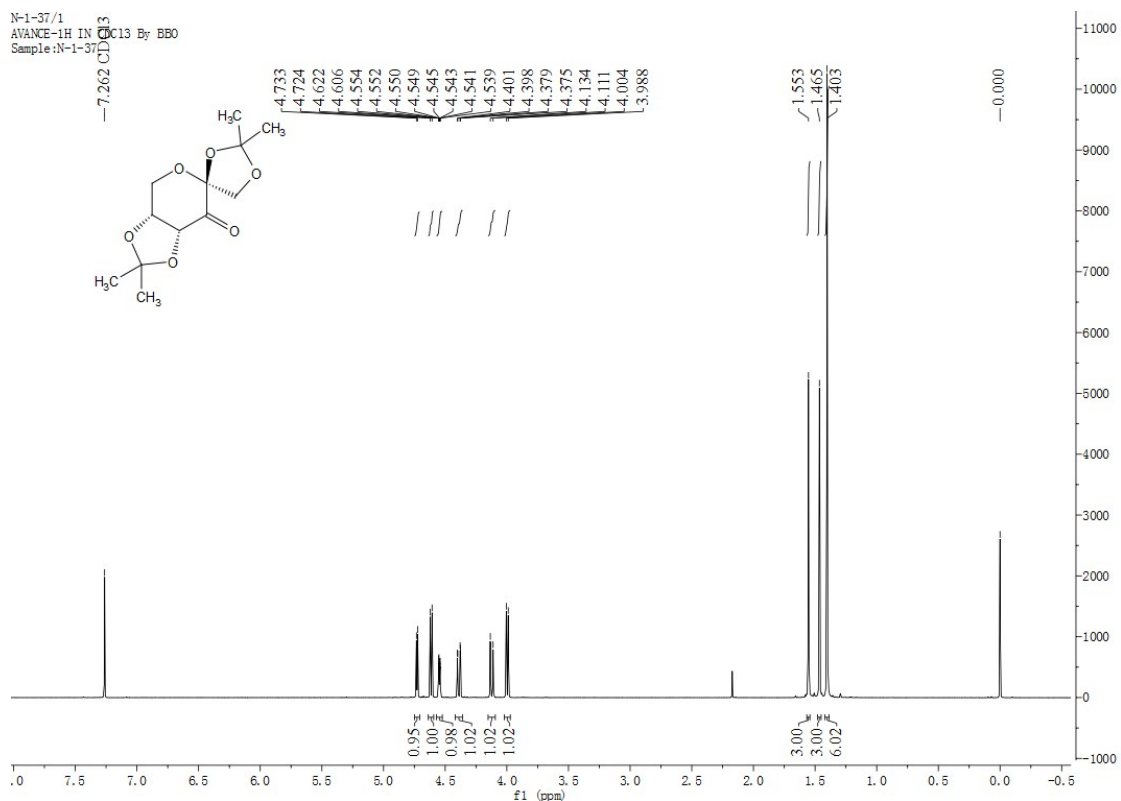

**<sup>1</sup>H-NMR (600 MHz, CDCl<sub>3</sub>) spectrum for 13**

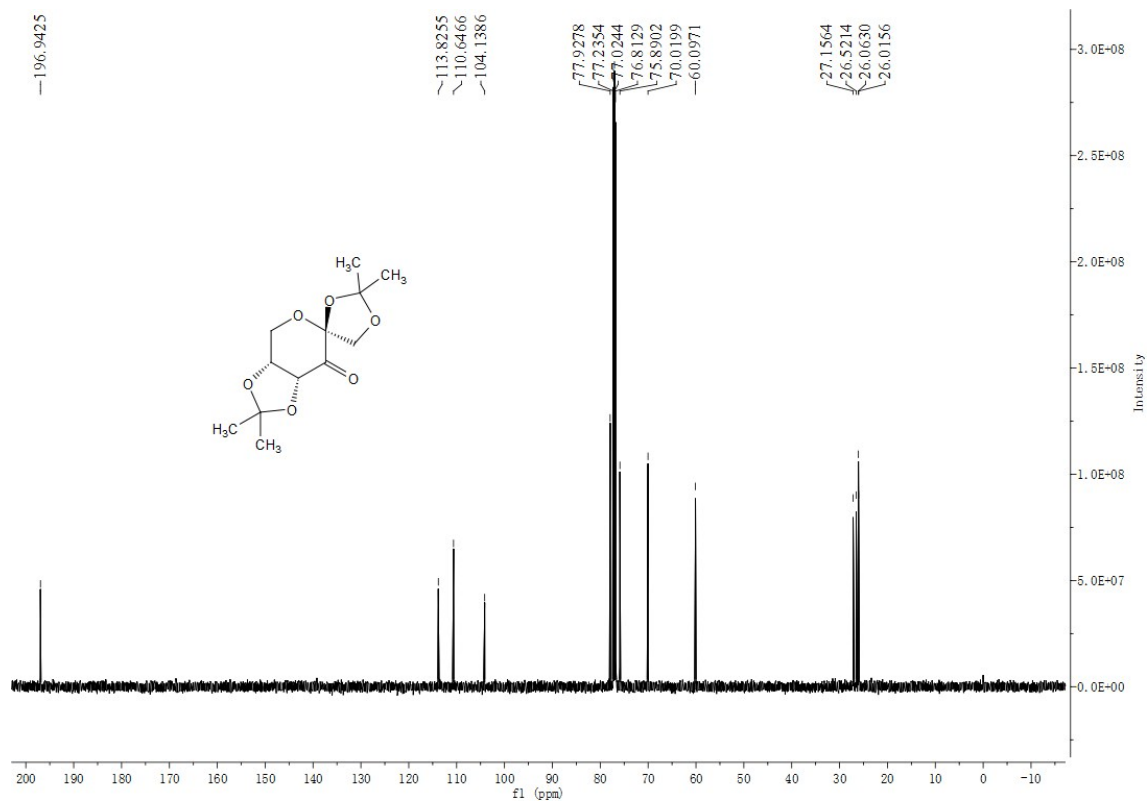

**<sup>13</sup>C-NMR (150 MHz, CDCl<sub>3</sub>) spectrum for 13**

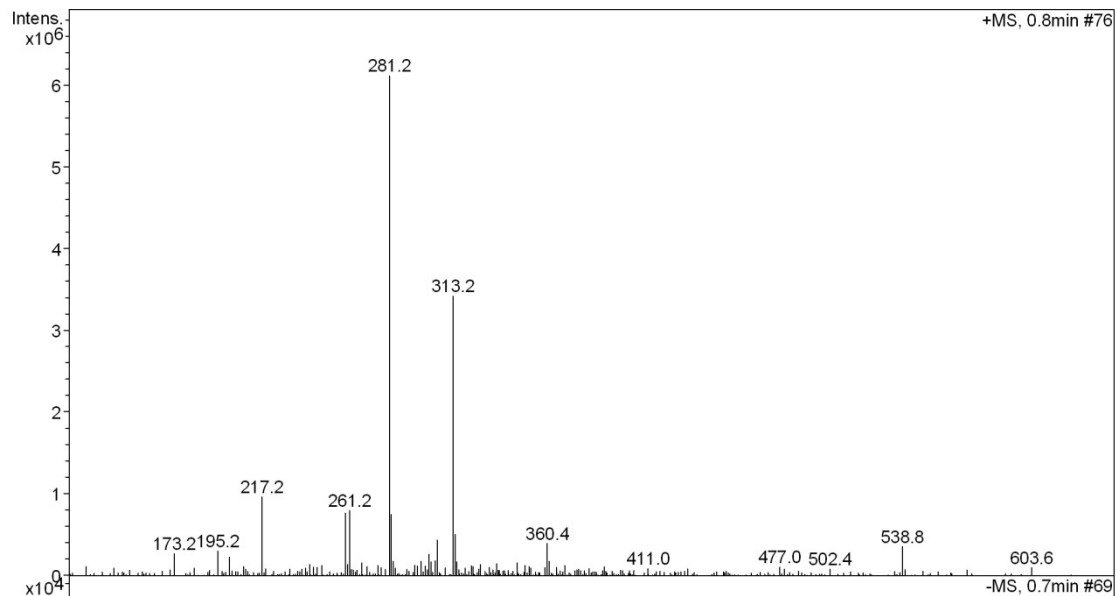

MS for 13

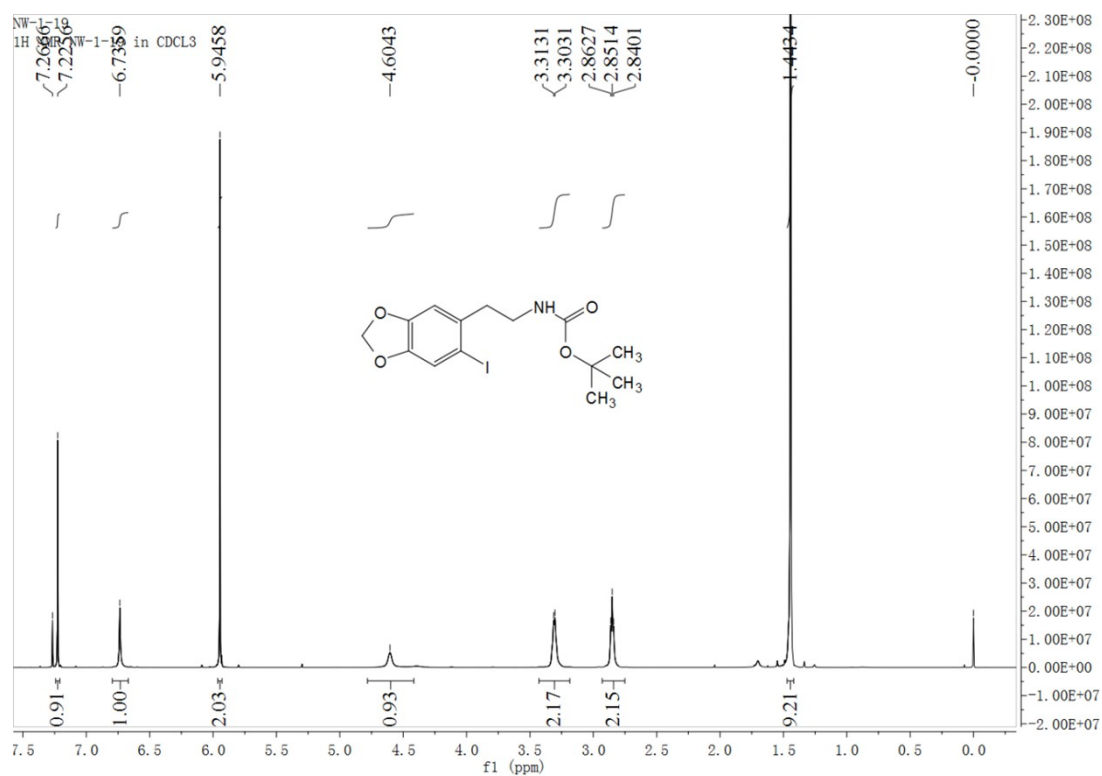

<sup>1</sup>H NMR (600 MHz, CDCl<sub>3</sub>) spectrum for compound 5

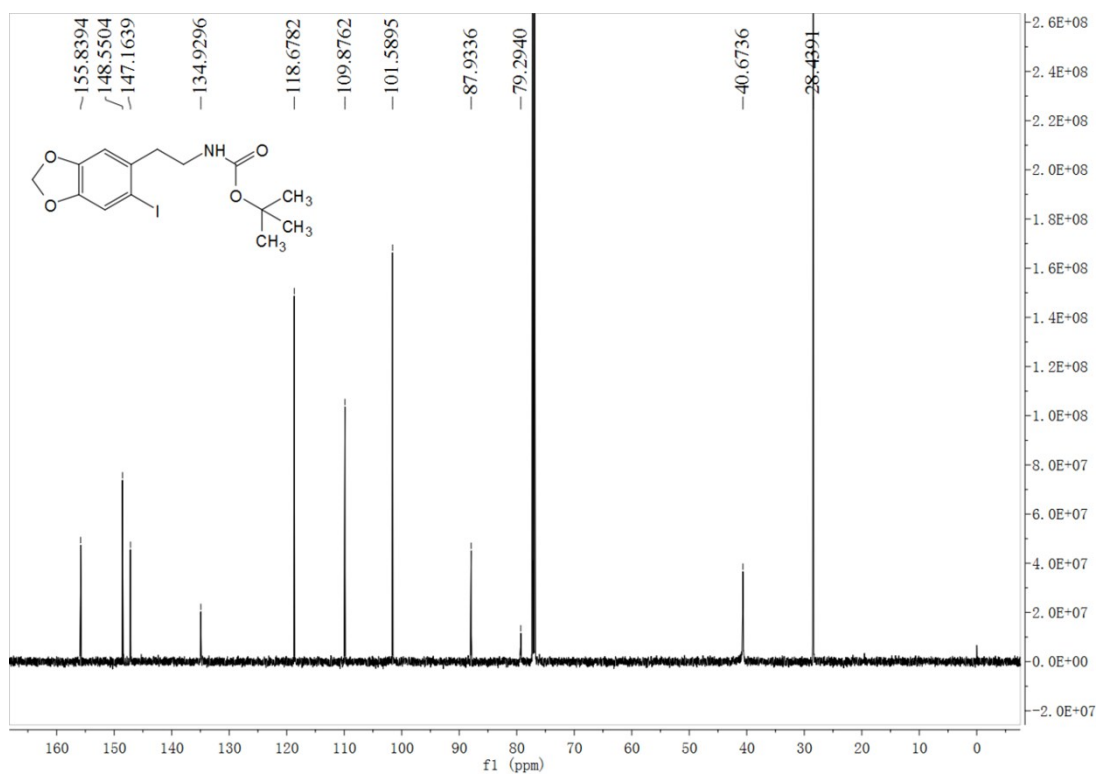

**<sup>13</sup>C NMR (150 MHz, CDCl<sub>3</sub>) spectrum for compound 5**

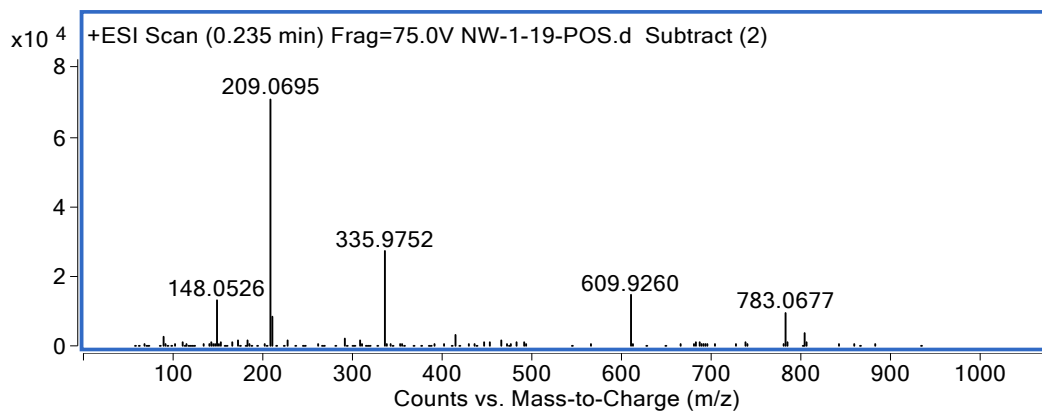

**HRMS for compound 5**

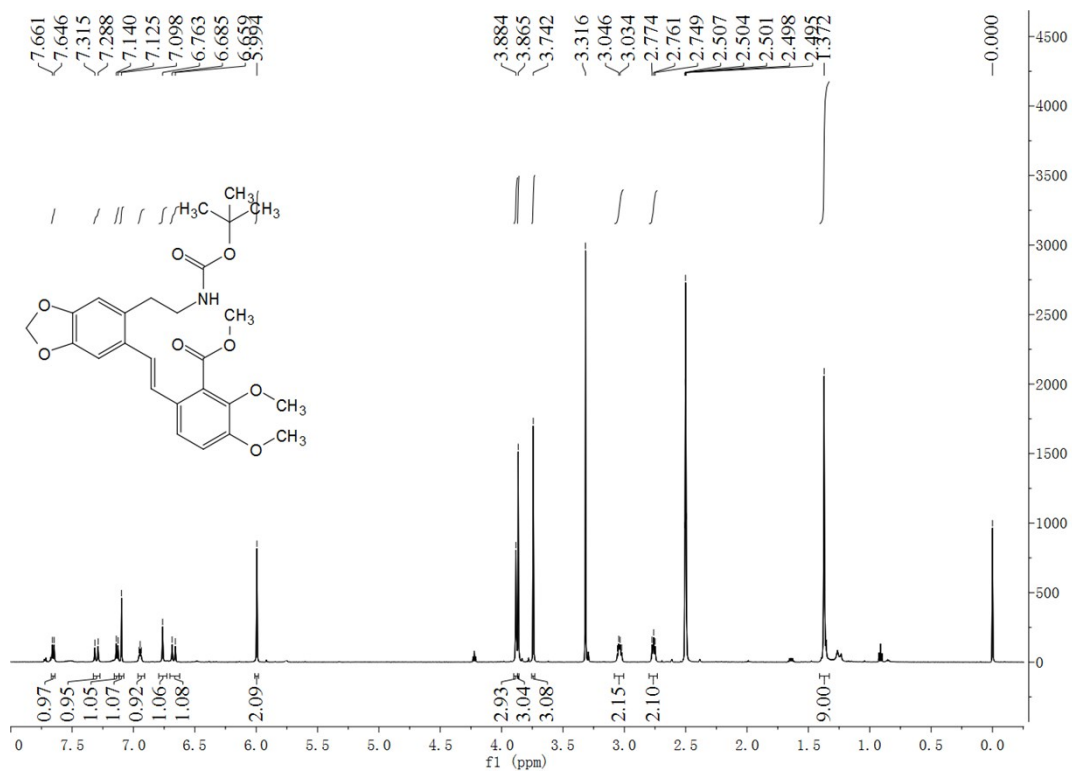

**<sup>1</sup>H NMR (600 MHz, DMSO-*d*<sub>6</sub>) spectrum for compound 4**

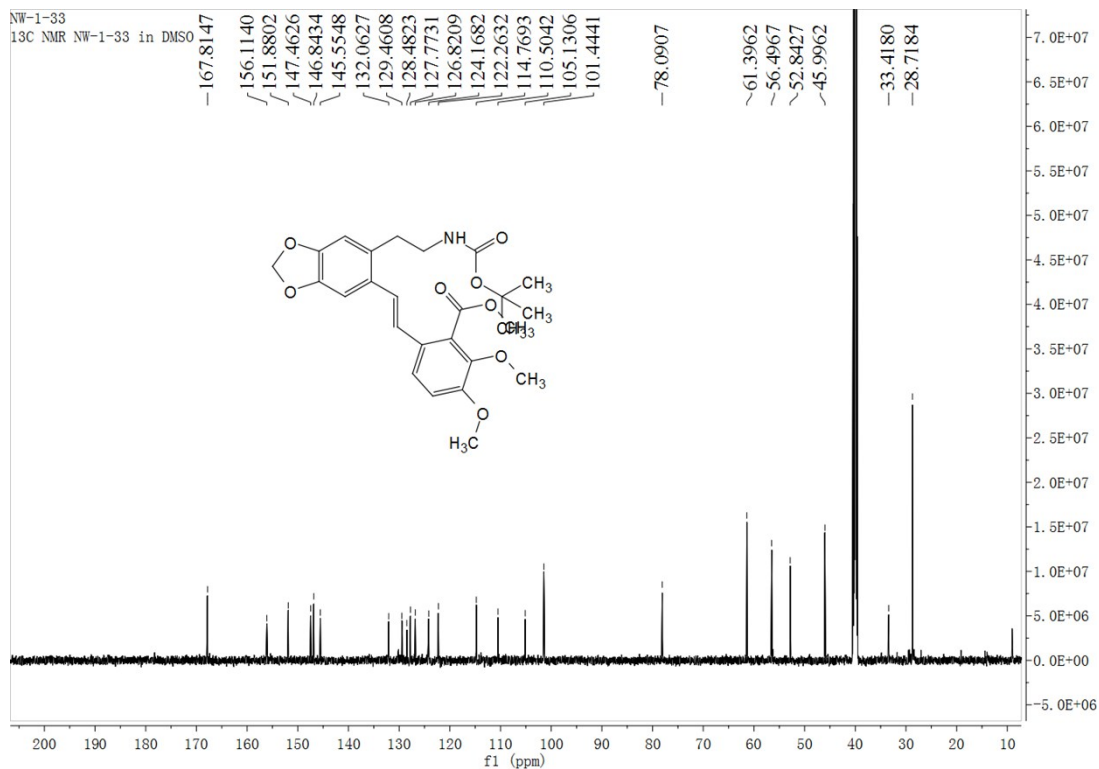

**<sup>13</sup>C NMR (150 MHz, DMSO-*d*<sub>6</sub>) spectrum for compound 4**

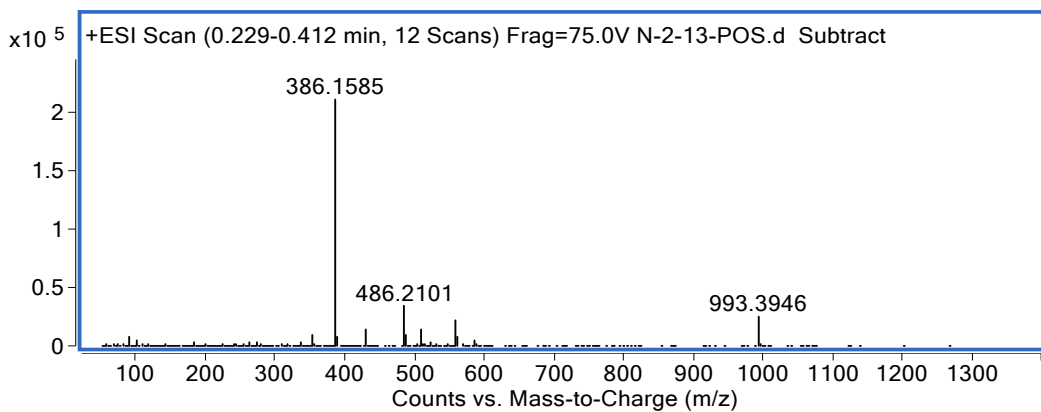

HRMS for compound 4

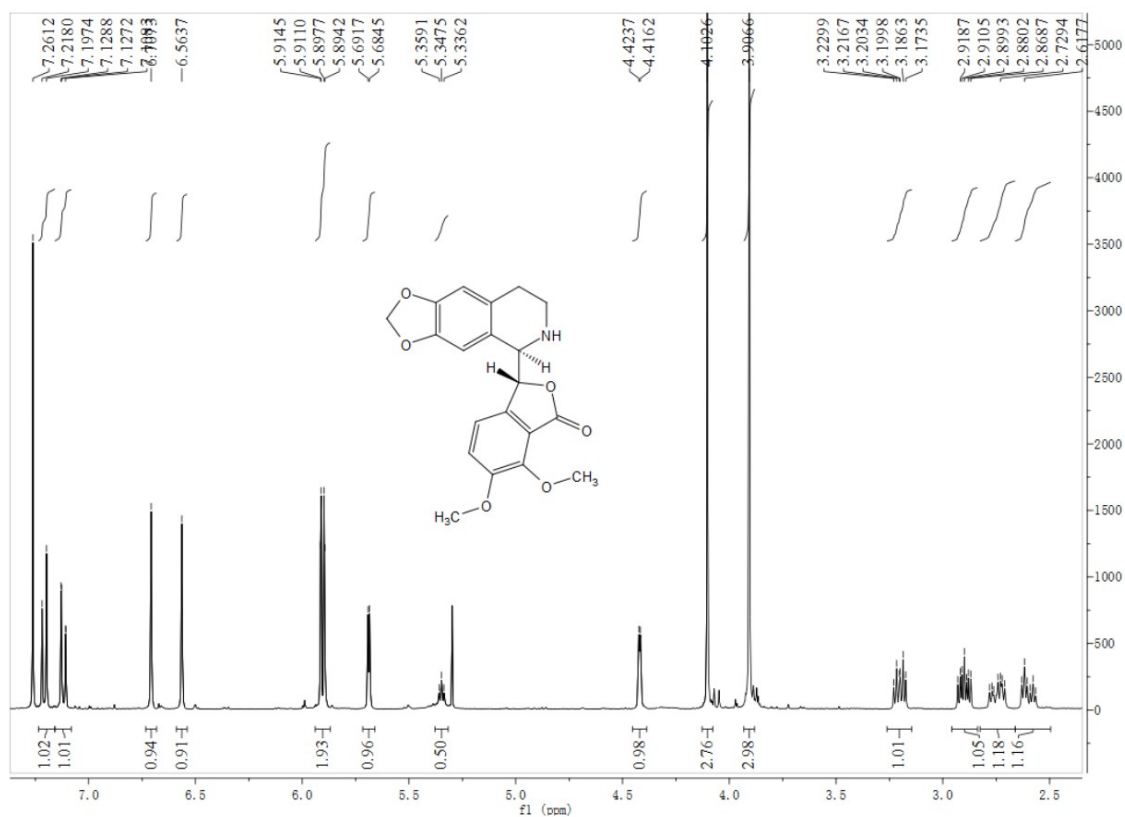

$^1\text{H-NMR}$  (400 MHz,  $\text{CDCl}_3$ ) spectrum for (-)- $\alpha$ -2

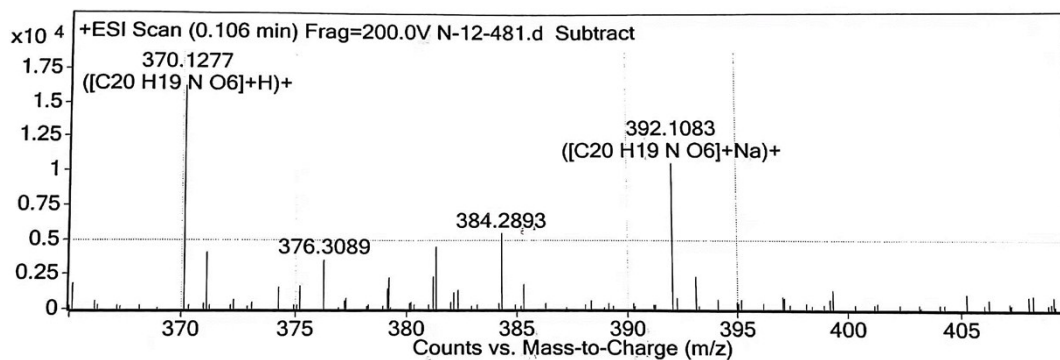

HRMS for (-)- $\alpha$ -2

**Chiral HPLC spectrum for (-)- $\alpha$ -2**

|                 |                                                          |
|-----------------|----------------------------------------------------------|
| Column          | : CHIRALPAK <sup>®</sup> IH(IH00CD-VK018)                |
| Column size     | : 0.46 cm I.D. ×15 cm L ×5 $\mu$ m                       |
| Injection       | : 4 $\mu$ l                                              |
| Mobile phase    | : n-Hexane/ Ethanol / Diethylamine = 40/ 60/ 0.1 (v/v/v) |
| Flow rate       | : 0.8 ml/min                                             |
| Wave length     | : UV 220 nm                                              |
| Temperature     | : 35 $^{\circ}$ C                                        |
| Sample solution | : X mg/ml in EtOH30% MeOH30% Hexane40%(荡洗)               |
| HPLC equipment  | : Shimadzu LC 20A QA&QC-HPLC-12                          |

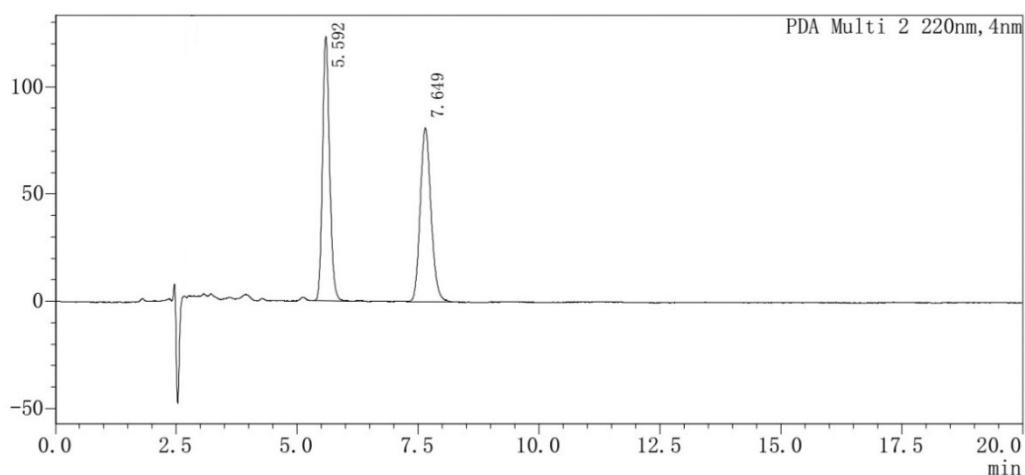

<Column Performance Report>

| Peak No. | Time  | Area    | Area % | Plate number | Tailing | Resolution |
|----------|-------|---------|--------|--------------|---------|------------|
| 1        | 5.592 | 1265119 | 50.055 | 6855         | 1.164   | --         |
| 2        | 7.649 | 1262355 | 49.945 | 5560         | 1.152   | 6.046      |

**Rac-[( $\pm$ )- $\alpha$ -2]**

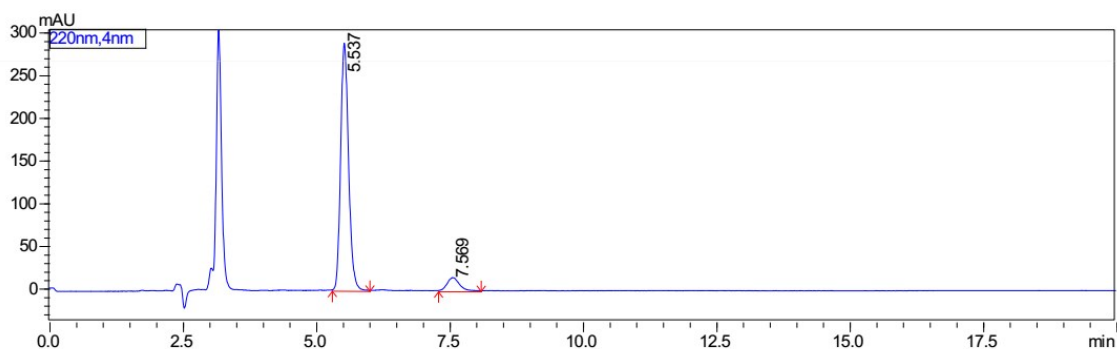

<Column Performance Report>

| Peak No. | Time  | Area    | Area % | Plate number | Tailing | Resolution |
|----------|-------|---------|--------|--------------|---------|------------|
| 1        | 5.537 | 2977655 | 92.719 | 6665         | 1.183   | --         |
| 2        | 7.569 | 233812  | 7.281  | 5629         | 1.159   | 6.021      |

**Table S1 entry 14 [(-)- $\alpha$ -2]**



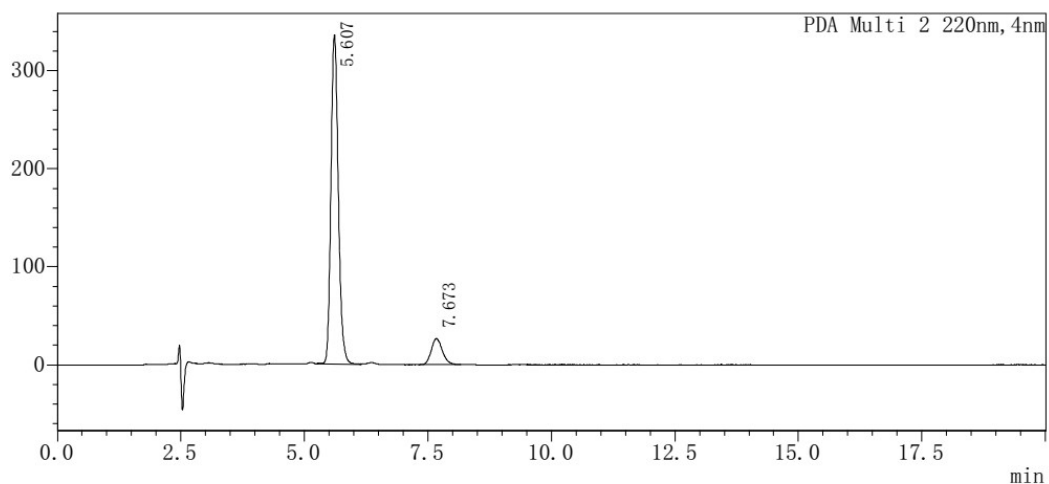

<Column Performance Report>

| Peak No. | Time  | Area    | Area % | Plate number | Tailing | Resolution |
|----------|-------|---------|--------|--------------|---------|------------|
| 1        | 5.607 | 3462326 | 89.236 | 6872         | 1.173   | --         |
| 2        | 7.673 | 417645  | 10.764 | 5632         | 1.179   | 6.080      |

Table S1 entry 15

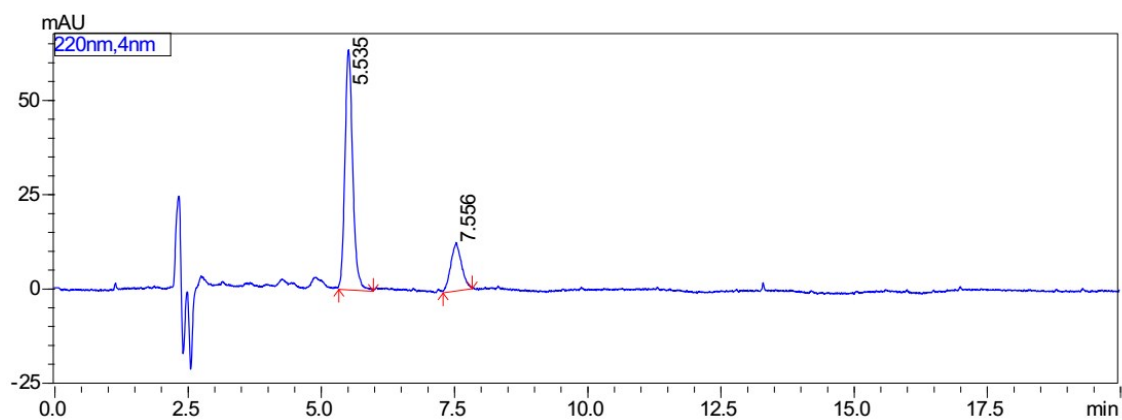

<Column Performance Report>

| Peak No. | Time  | Area   | Area % | Plate number | Tailing | Resolution |
|----------|-------|--------|--------|--------------|---------|------------|
| 1        | 5.535 | 636685 | 79.076 | 7073         | 1.212   | --         |
| 2        | 7.556 | 168471 | 20.924 | 6113         | 1.070   | 6.219      |

Table S1 entry 16

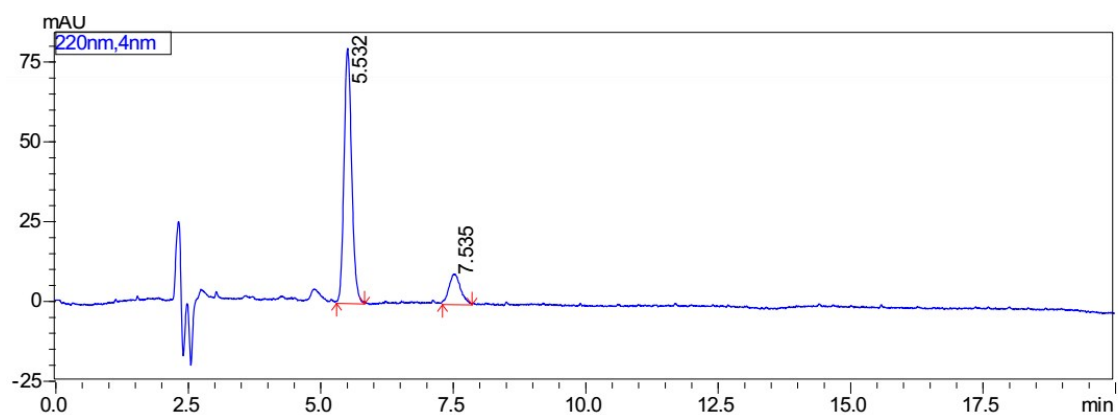

<Column Performance Report>

| Peak No. | Time  | Area   | Area % | Plate number | Tailing | Resolution |
|----------|-------|--------|--------|--------------|---------|------------|
| 1        | 5.532 | 793531 | 85.309 | 7064         | 1.147   | --         |
| 2        | 7.535 | 136650 | 14.691 | 6000         | 1.131   | 6.138      |

Table S1 entry 17

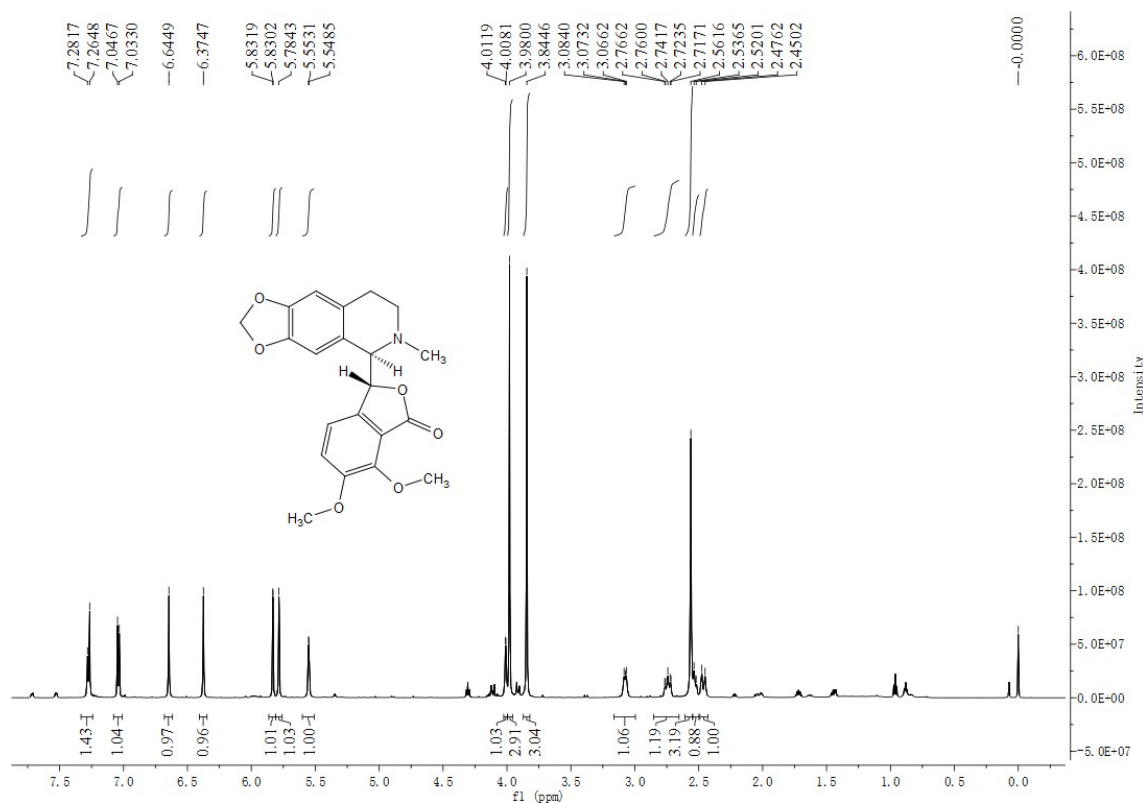

<sup>1</sup>H-NMR (600 MHz, CDCl<sub>3</sub>) spectrum for (-)- $\alpha$ -Hydrastine

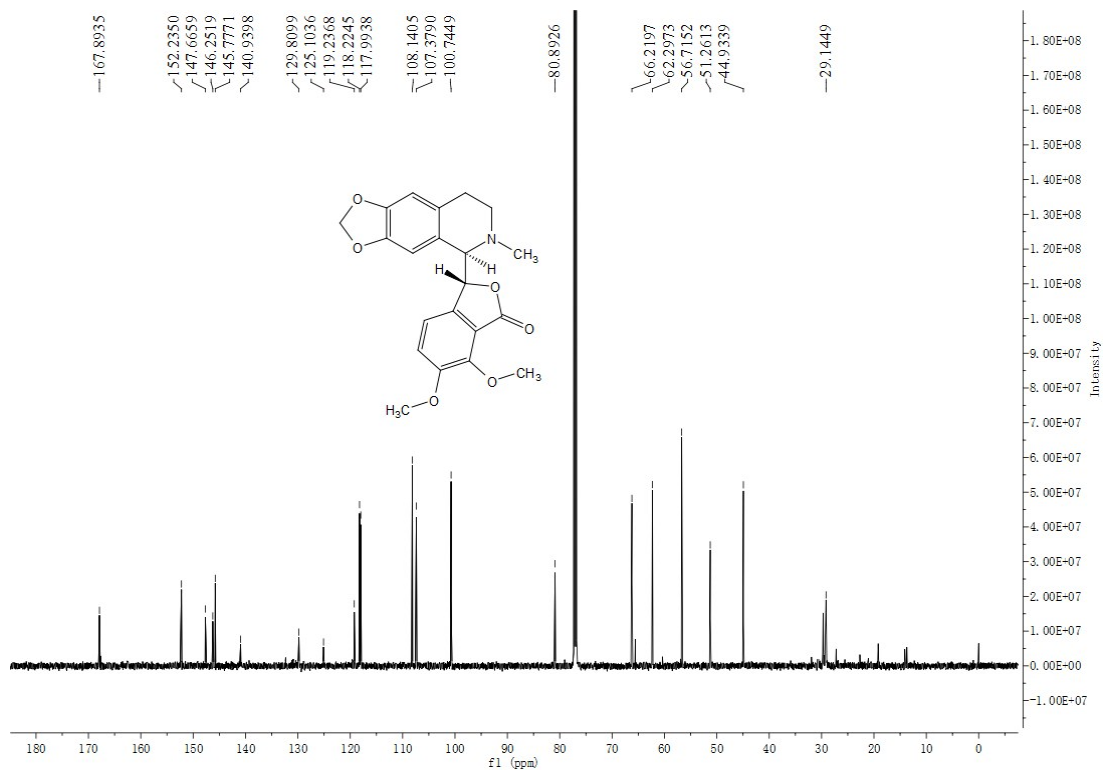

**$^{13}\text{C}$ -NMR (150 MHz,  $\text{CDCl}_3$ ) spectrum for (-)- $\alpha$ -Hydrastine**

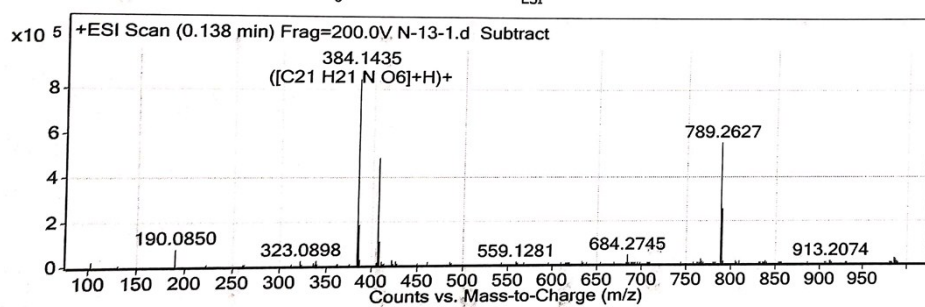

**HRMS for (-)- $\alpha$ -Hydrastine**

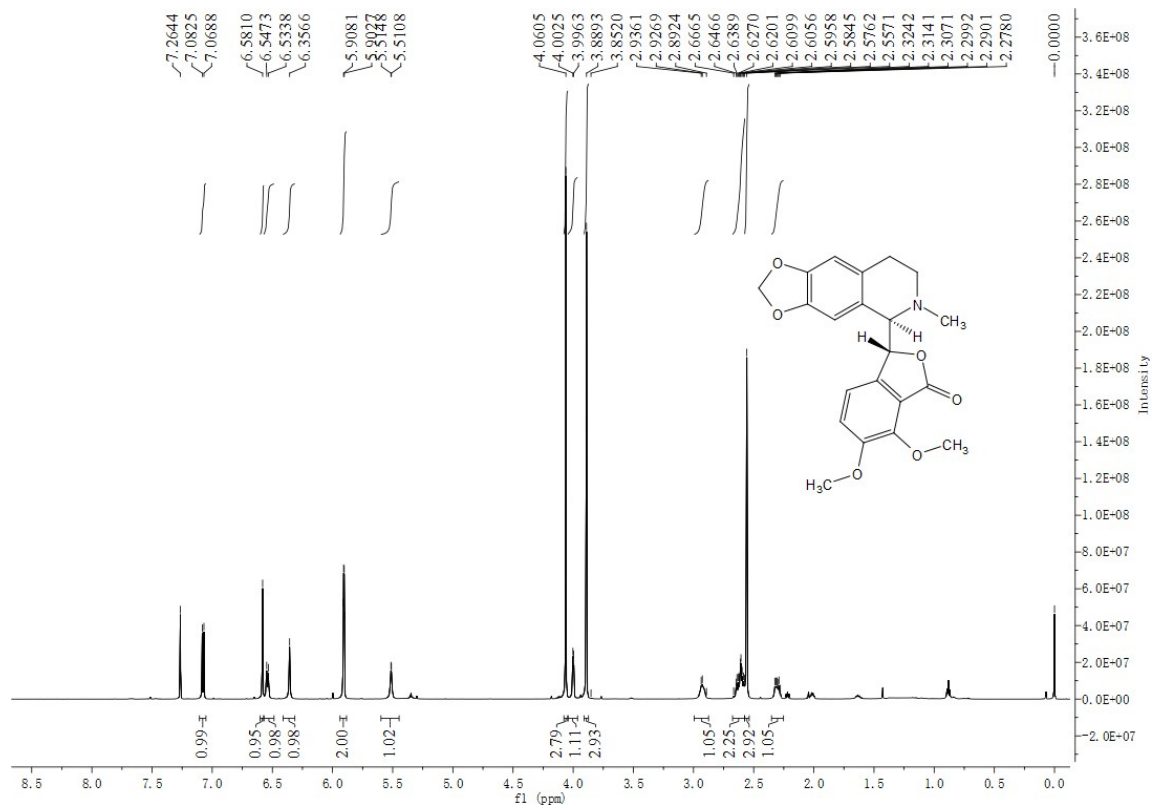

**<sup>1</sup>H-NMR (600 MHz, CDCl<sub>3</sub>) spectrum for (-)-β-Hydrastine**

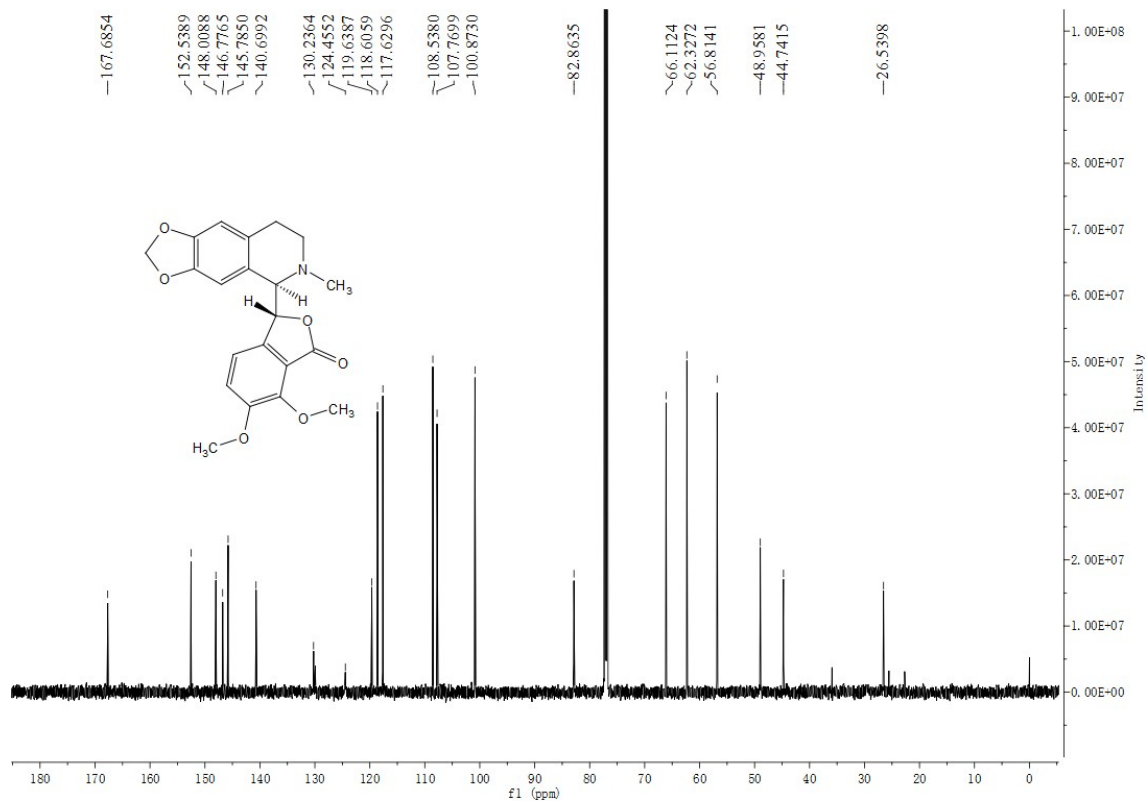

**<sup>13</sup>C-NMR (150 MHz, CDCl<sub>3</sub>) spectrum for (-)-β-Hydrastine**

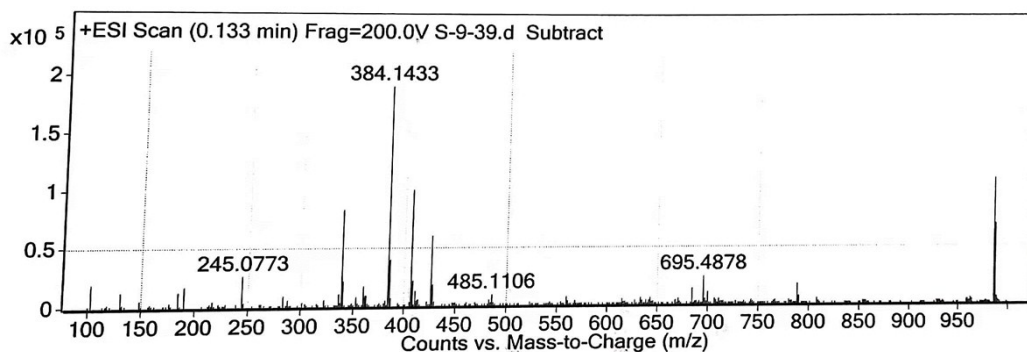

HRMS for (-)-β-Hydrastine

Chiral HPLC spectrum for (-)-β-Hydrastine

|                 |                                                    |
|-----------------|----------------------------------------------------|
| Column          | : CHIRALPAK® IF                                    |
| Column size     | : 0.46 cm I.D. ×15 cm L ×5 μm                      |
| Injection       | : 10μl                                             |
| Mobile phase    | : n-Hexane/ Ethanol/Diethylamine=70/30/0.1 (v/v/v) |
| Flow rate       | : 1.0 ml/min                                       |
| Wave length     | : UV 220 nm                                        |
| Temperature     | : 35°C                                             |
| Sample solution | : 1.0mg/mL inDCM10% EtOH 20% n-Hexane 70%          |
| HPLC equipment  | : Shimadzu LC 20A QA&QC-HPLC-10                    |

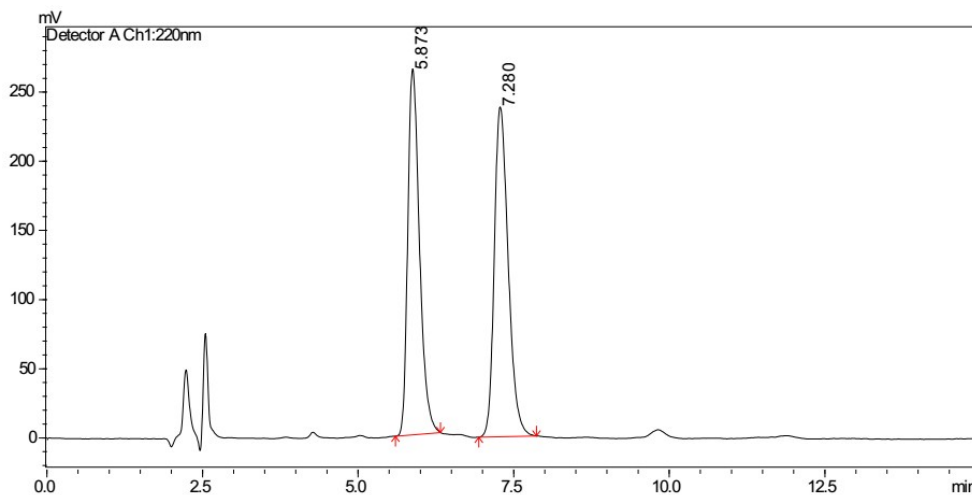

<Column Performance Report>

| Peak No. | Time  | Area    | Area %  | Plate number | Tailing | Resolution |
|----------|-------|---------|---------|--------------|---------|------------|
| 1        | 5.873 | 3474236 | 48.3197 | 4648.293     | 1.418   | --         |
| 2        | 7.280 | 3715874 | 51.6803 | 5091.448     | 1.322   | 3.738      |

Rac-β-Hydrastine

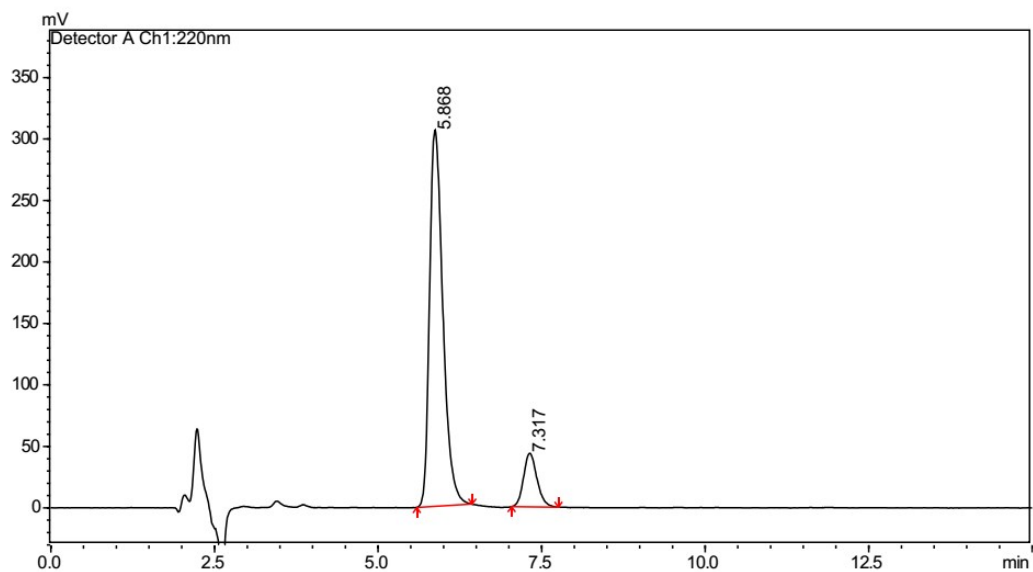

<Column Performance Report>

| Peak No. | Time  | Area    | Area %  | Plate number | Tailing | Resolution |
|----------|-------|---------|---------|--------------|---------|------------|
| 1        | 5.868 | 4347126 | 90.4651 | 4047.164     | 1.452   | --         |
| 2        | 7.317 | 623003  | 9.5349  | 6019.769     | 1.186   | 3.883      |

(-)- $\beta$ -Hydrastine

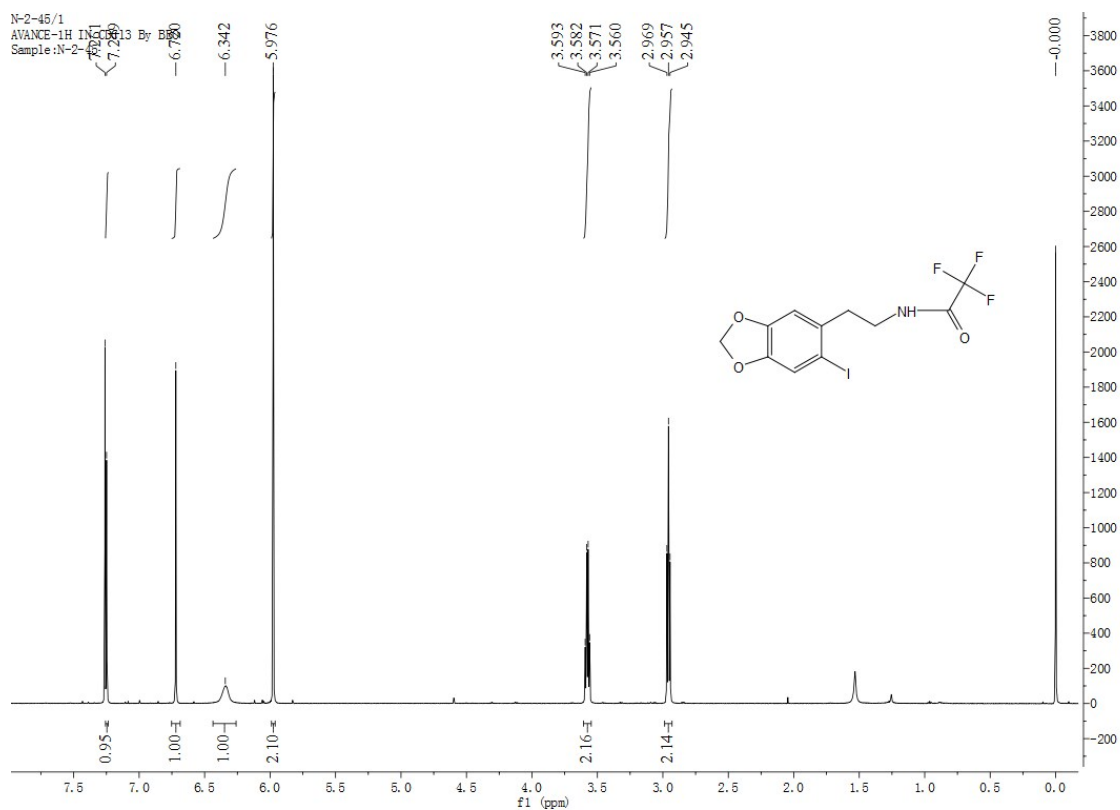

$^1\text{H-NMR}$  (600 MHz,  $\text{CDCl}_3$ ) spectrum for 15a

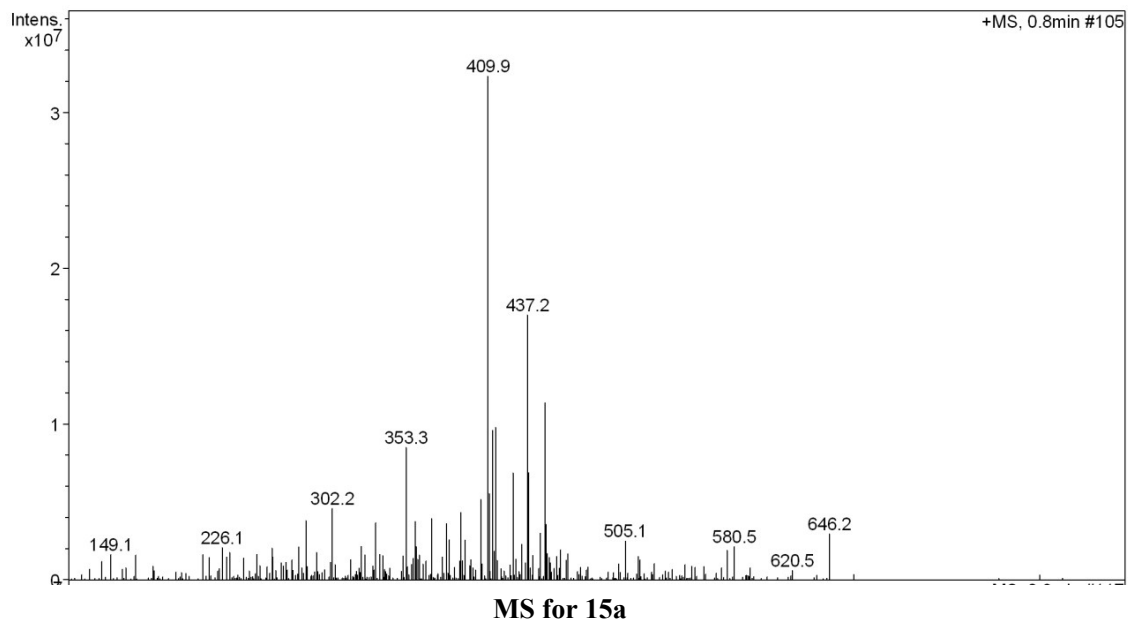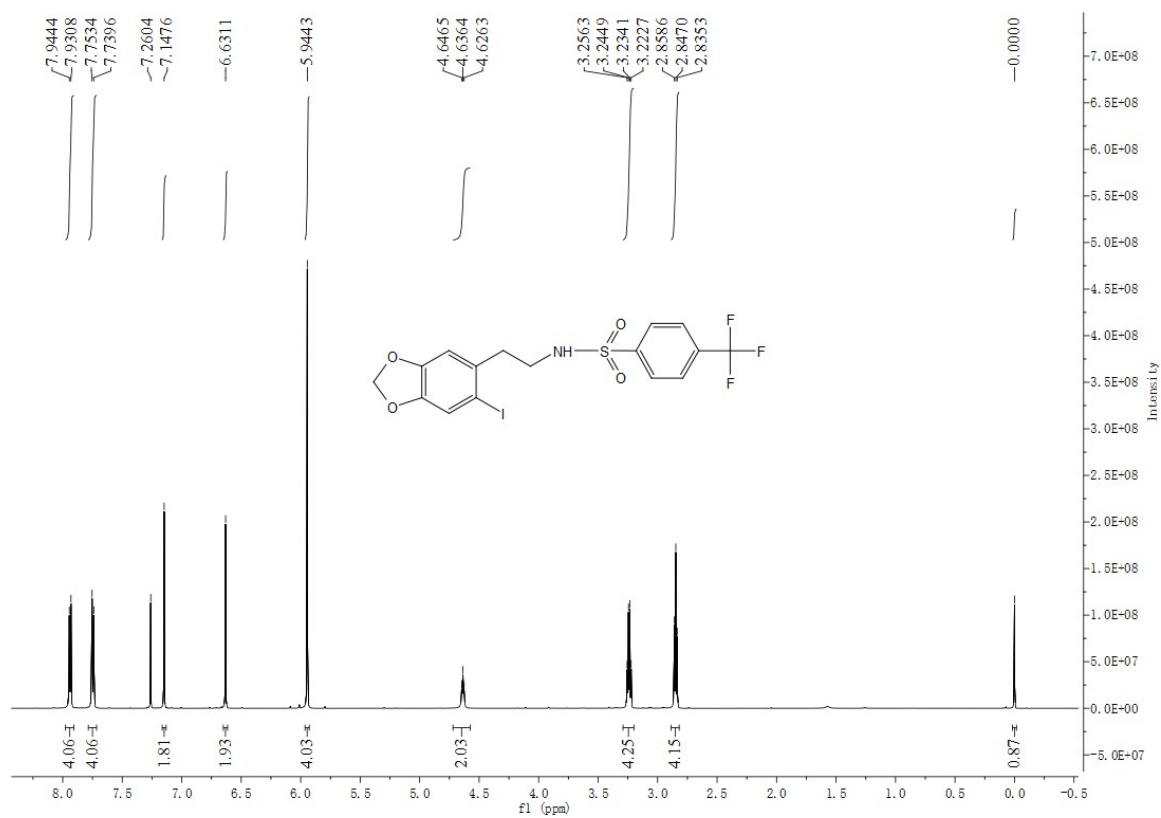

<sup>1</sup>H-NMR (600 MHz, CDCl<sub>3</sub>) spectrum for 15b

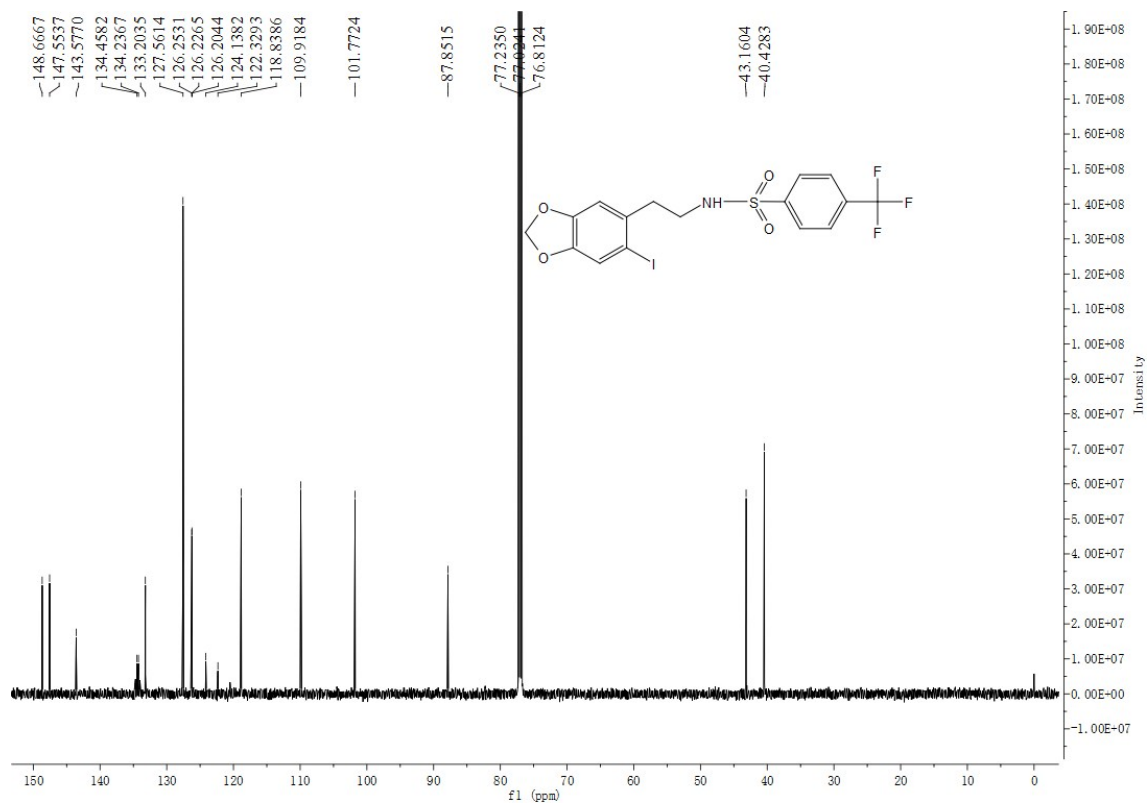

**<sup>13</sup>C-NMR (151 MHz, CDCl<sub>3</sub>) spectrum for 15b**

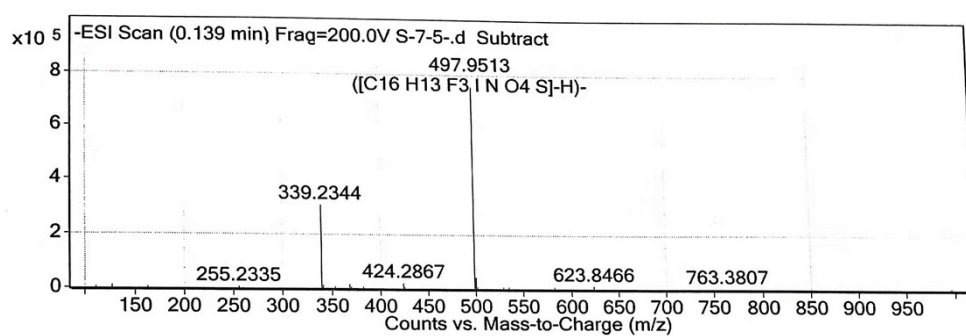

**HRMS for 15b**



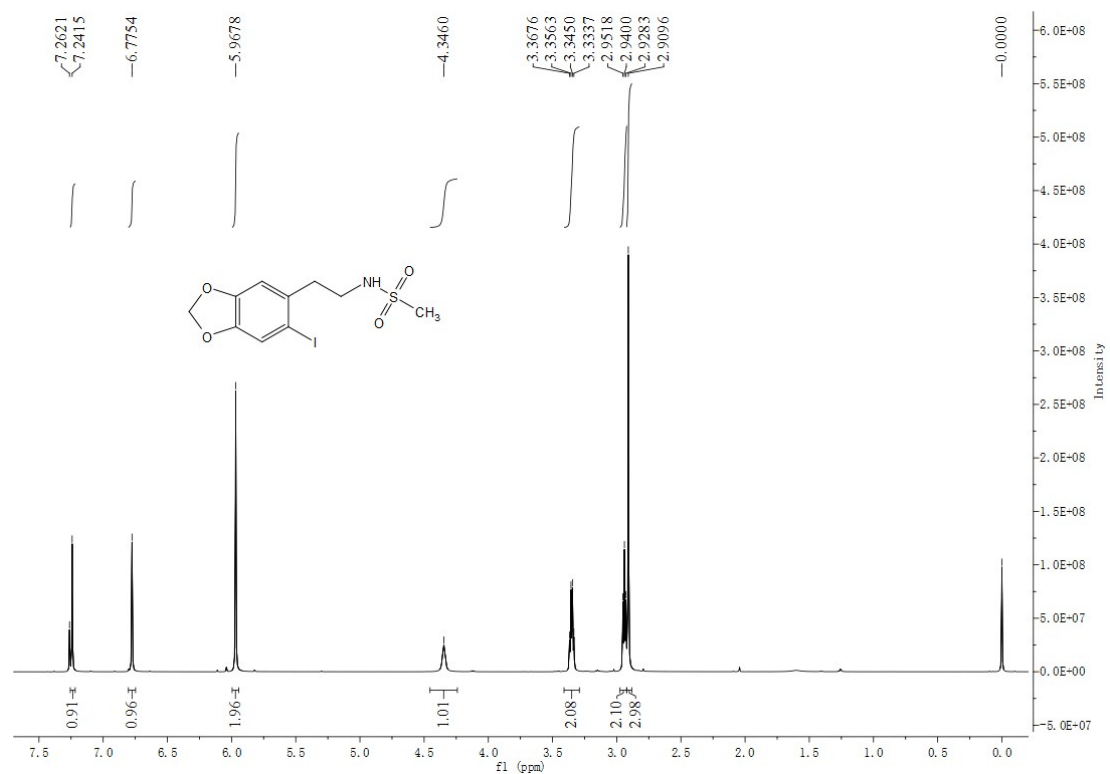

**<sup>1</sup>H-NMR (600 MHz, CDCl<sub>3</sub>) spectrum for 15c**

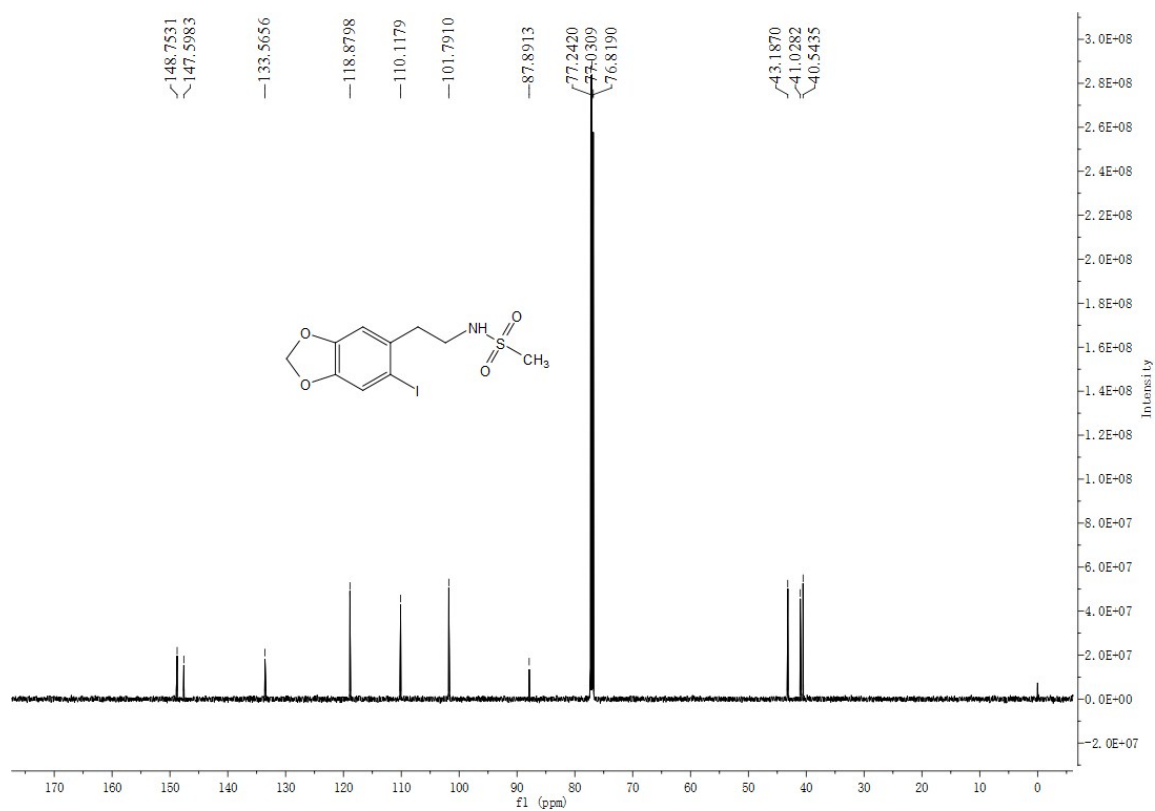

**<sup>13</sup>C-NMR (150 MHz, CDCl<sub>3</sub>) spectrum for 15c**

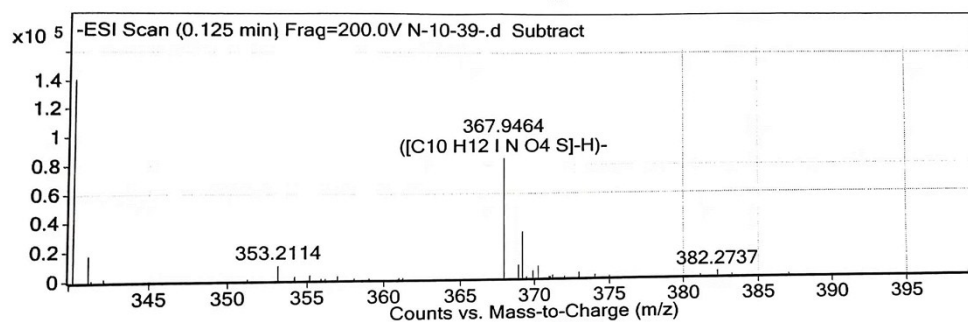

HRMS for 15c

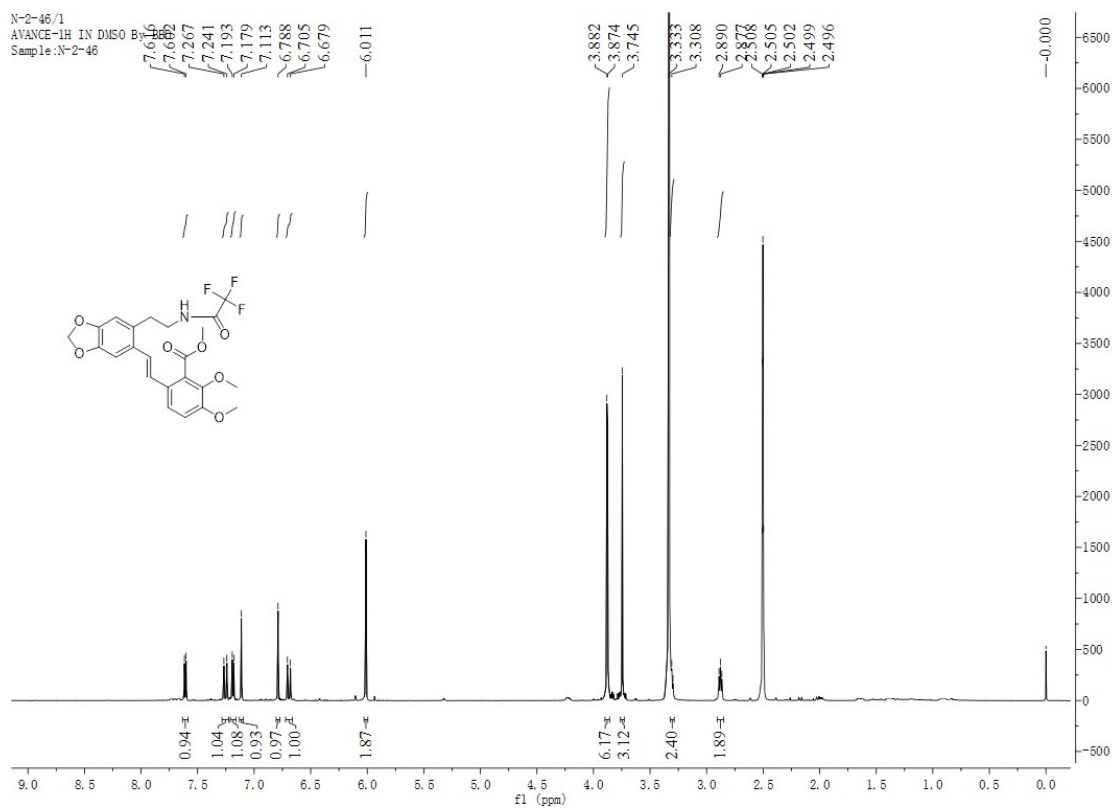

<sup>1</sup>H-NMR (600 MHz, DMSO-*d*<sub>6</sub>) spectrum for 16a

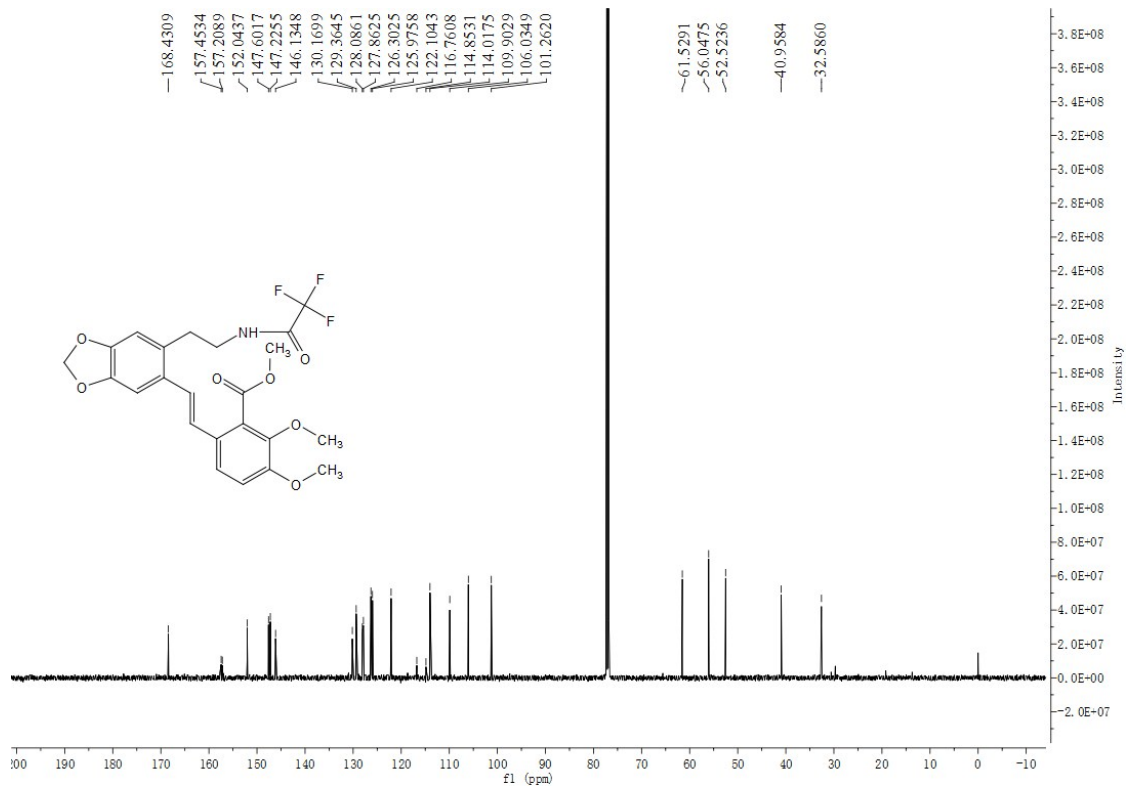

<sup>13</sup>C-NMR (150 MHz, CDCl<sub>3</sub>) spectrum for 16a

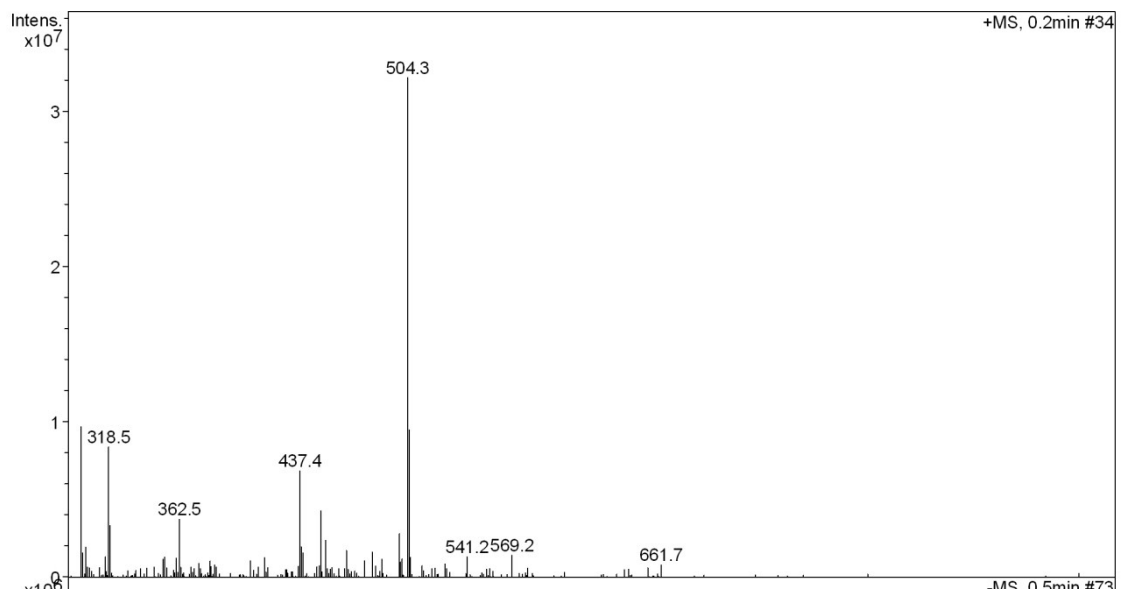

MS for 16a

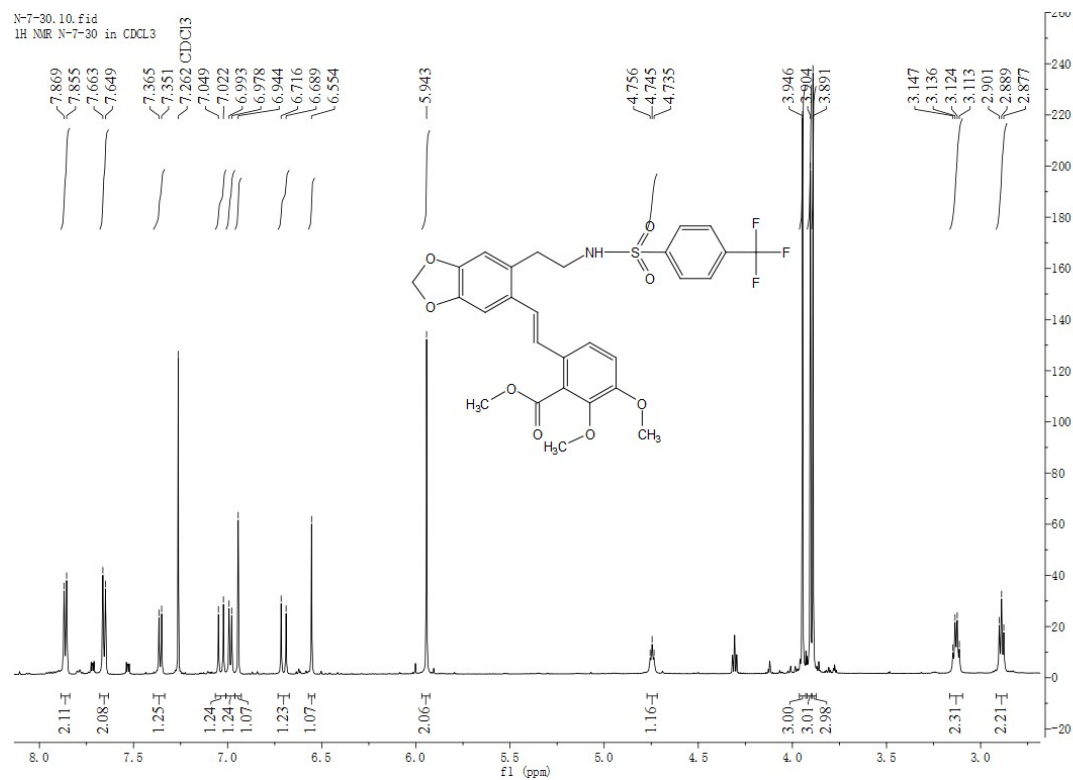

**<sup>1</sup>H-NMR (600 MHz, CDCl<sub>3</sub>) spectrum for 16b**

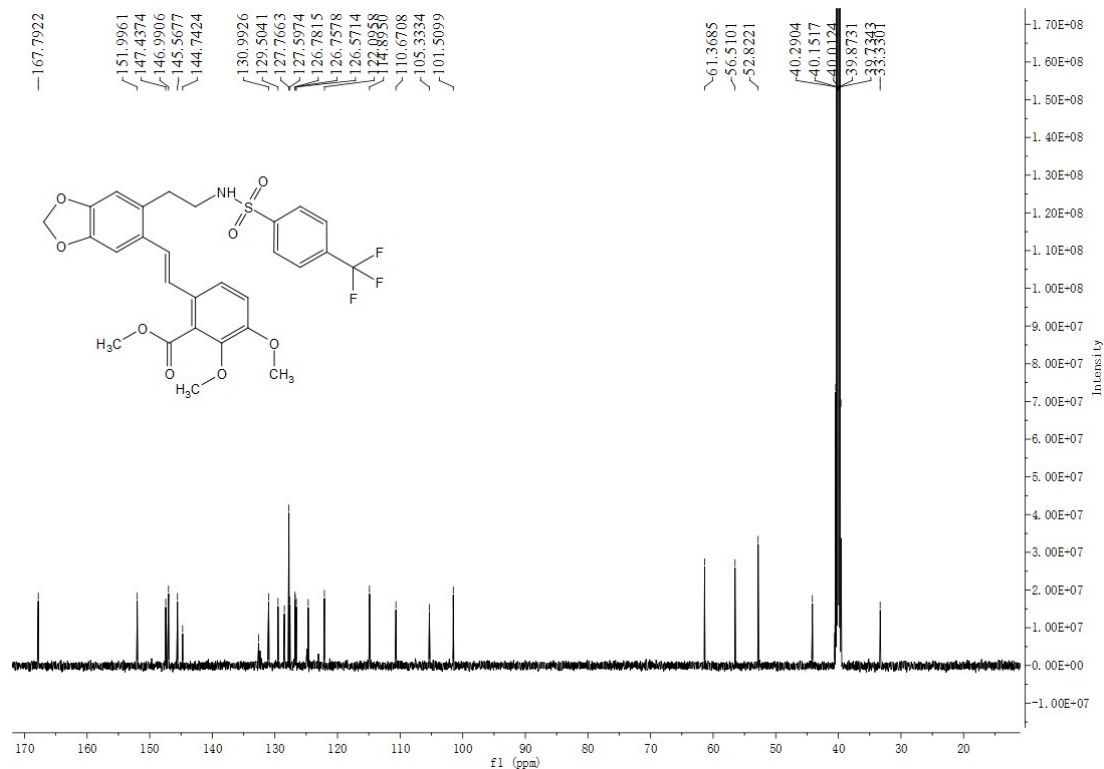

**<sup>13</sup>C-NMR (150 MHz, DMSO-*d*<sub>6</sub>) spectrum for 16b**

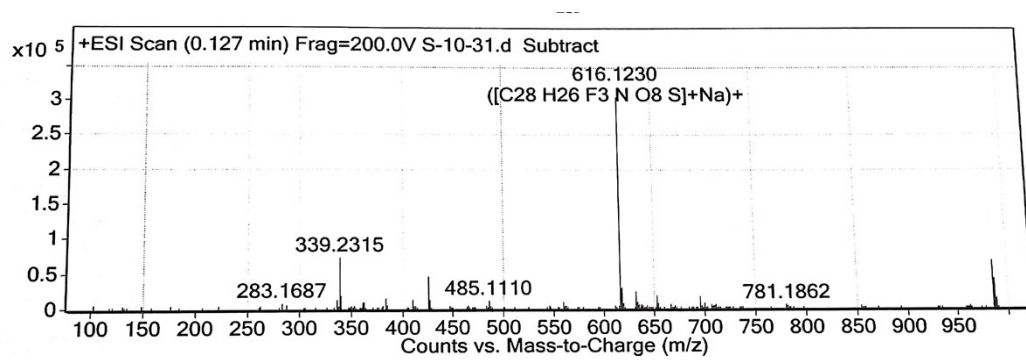

HRMS for 16b

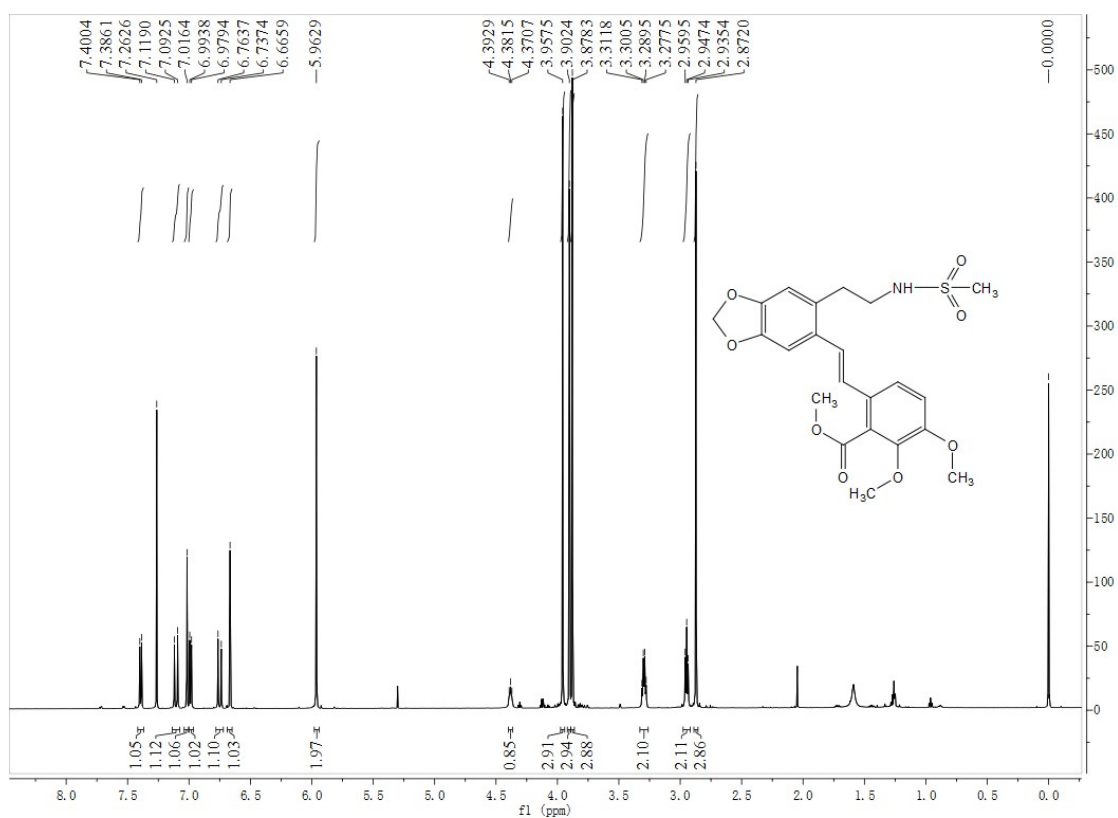

<sup>1</sup>H-NMR (600 MHz, CDCl<sub>3</sub>) spectrum for 16c

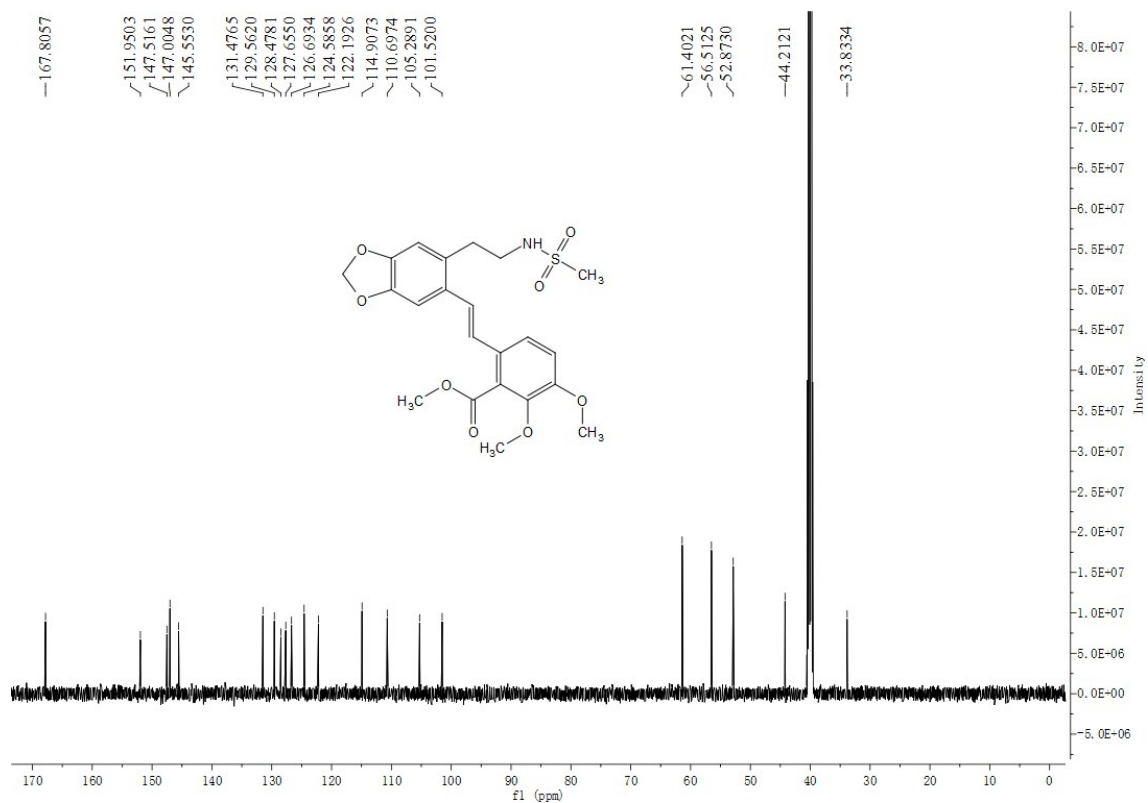

<sup>13</sup>C-NMR (150 MHz, DMSO-*d*<sub>6</sub>) spectrum for 16c

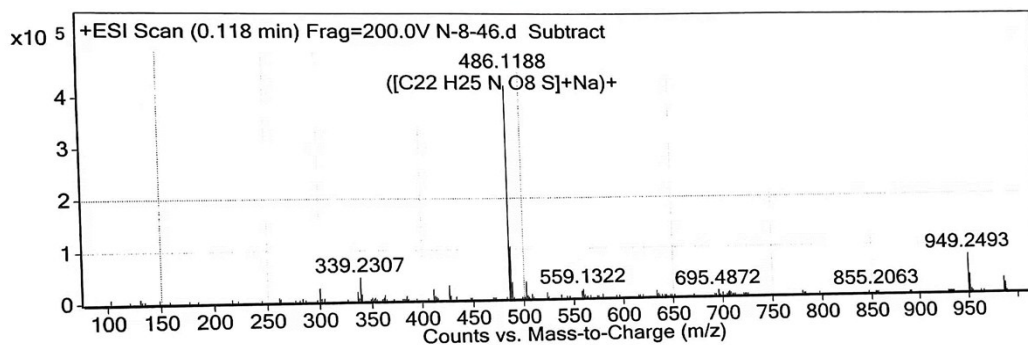

HRMS for 16c

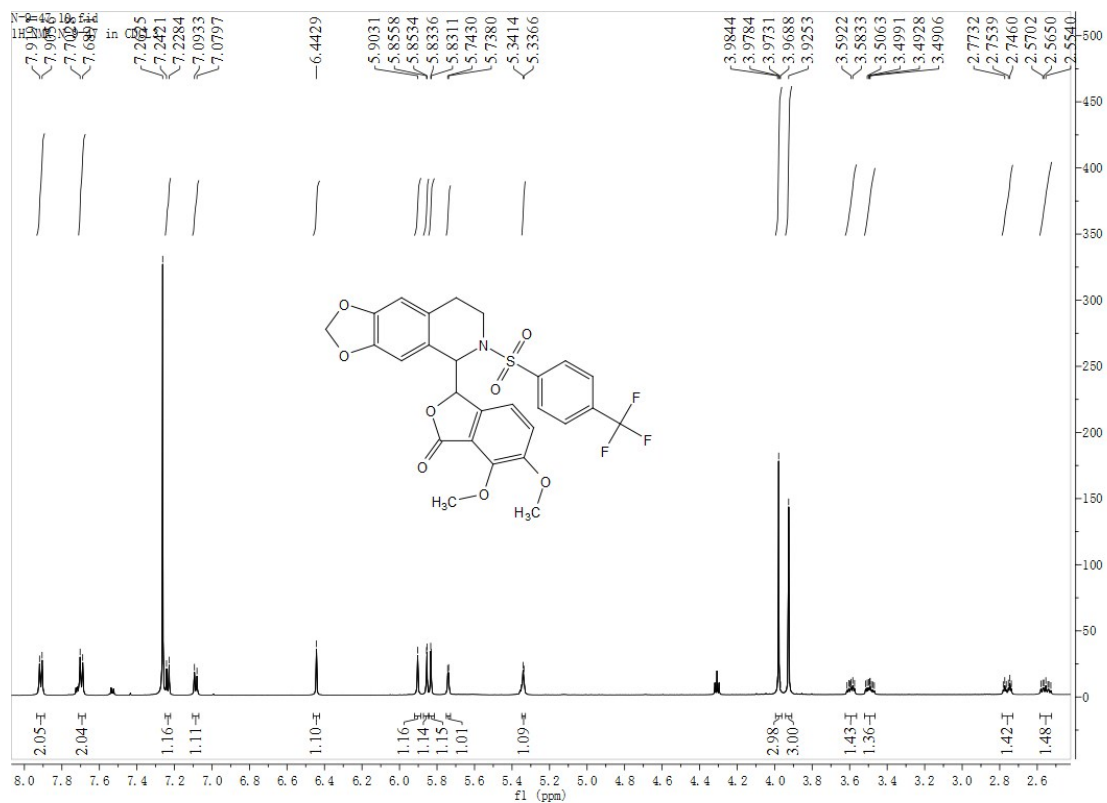

**<sup>1</sup>H-NMR (600 MHz, CDCl<sub>3</sub>) spectrum for (±)-β-18b**

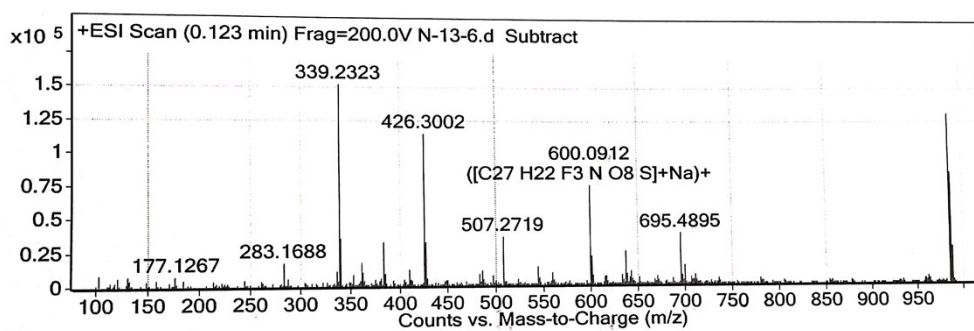

**HRMS for (±)-β-18b**

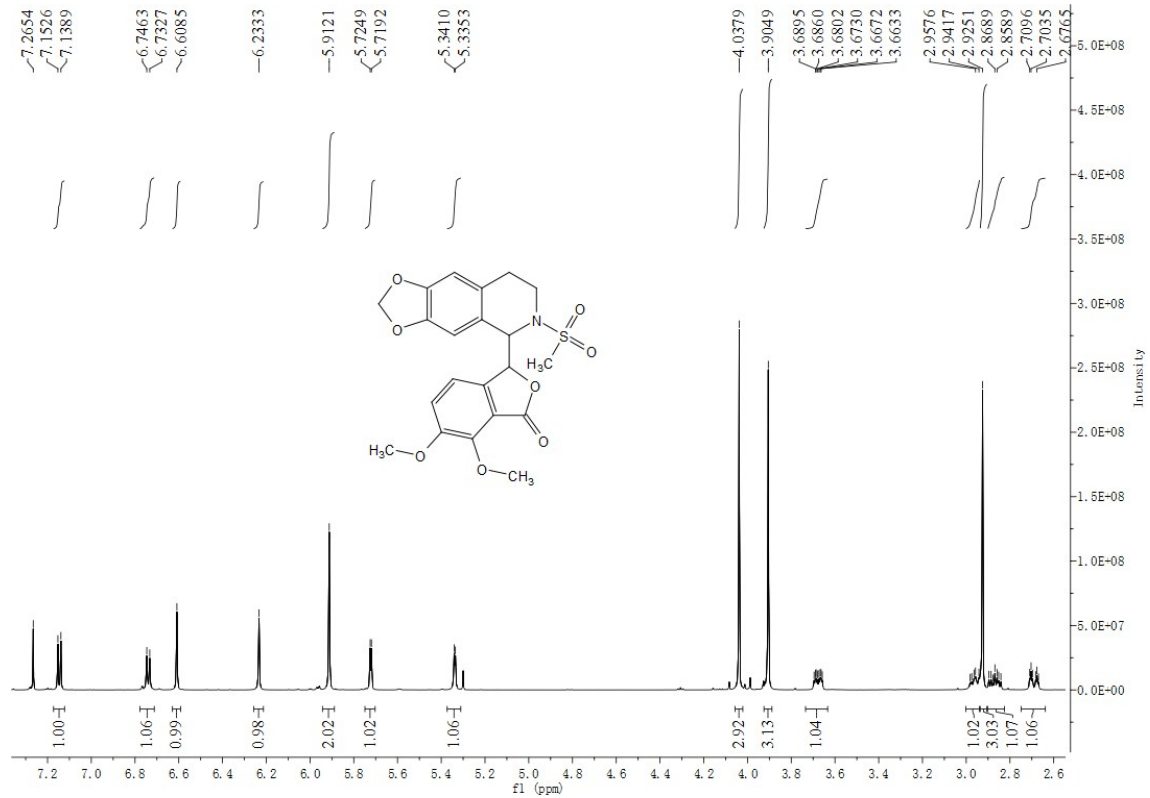

**<sup>1</sup>H-NMR (600 MHz, CDCl<sub>3</sub>) spectrum for (±)-β-18c**

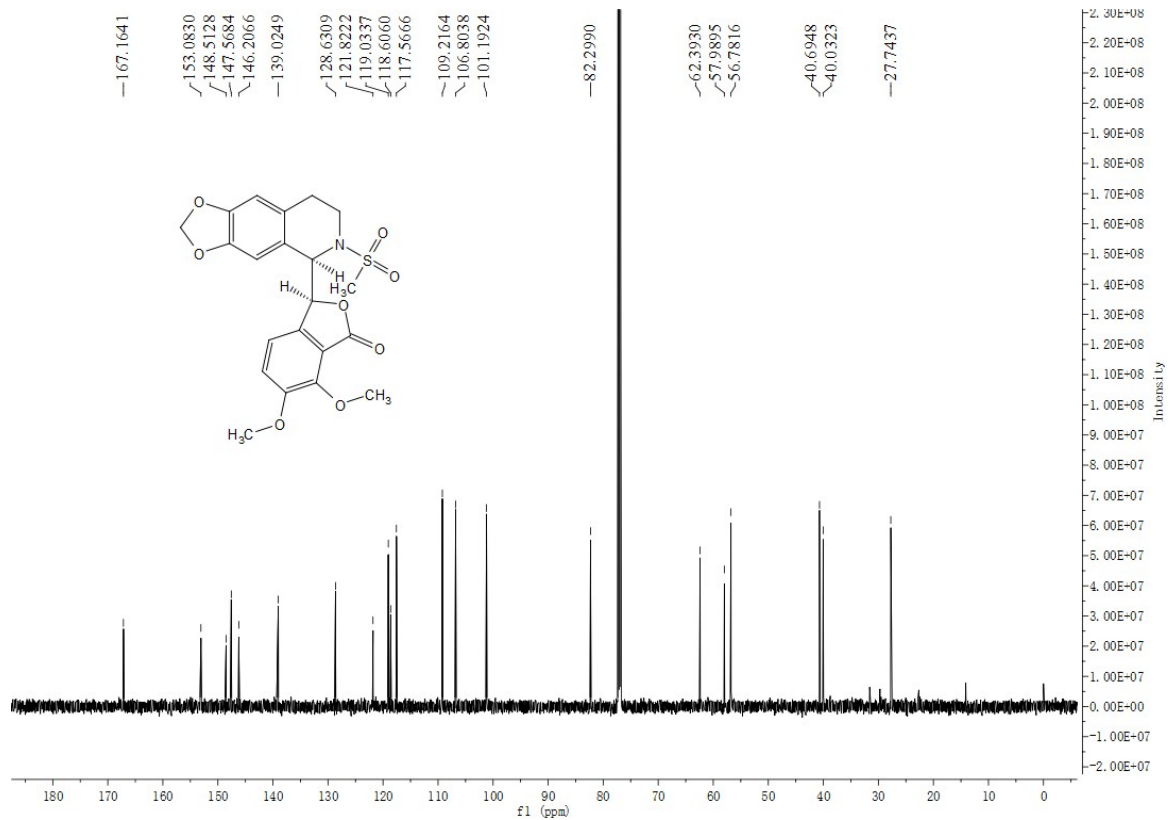

**<sup>13</sup>C-NMR (150 MHz, DMSO-*d*<sub>6</sub>) spectrum for (±)-β-18c**



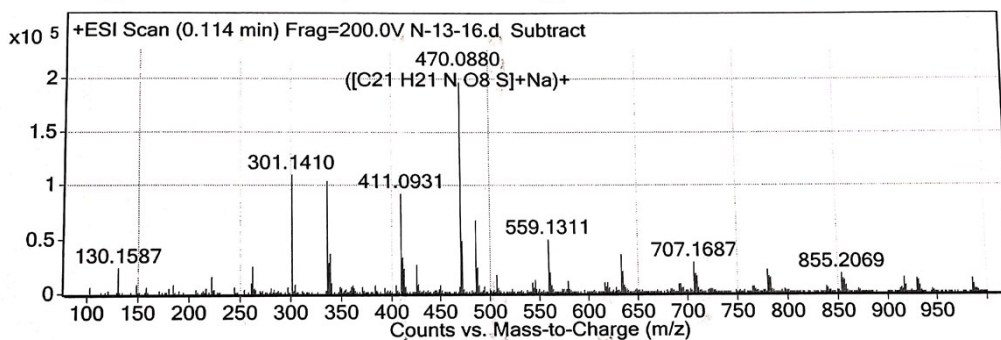

HRMS for (±)-β-18c

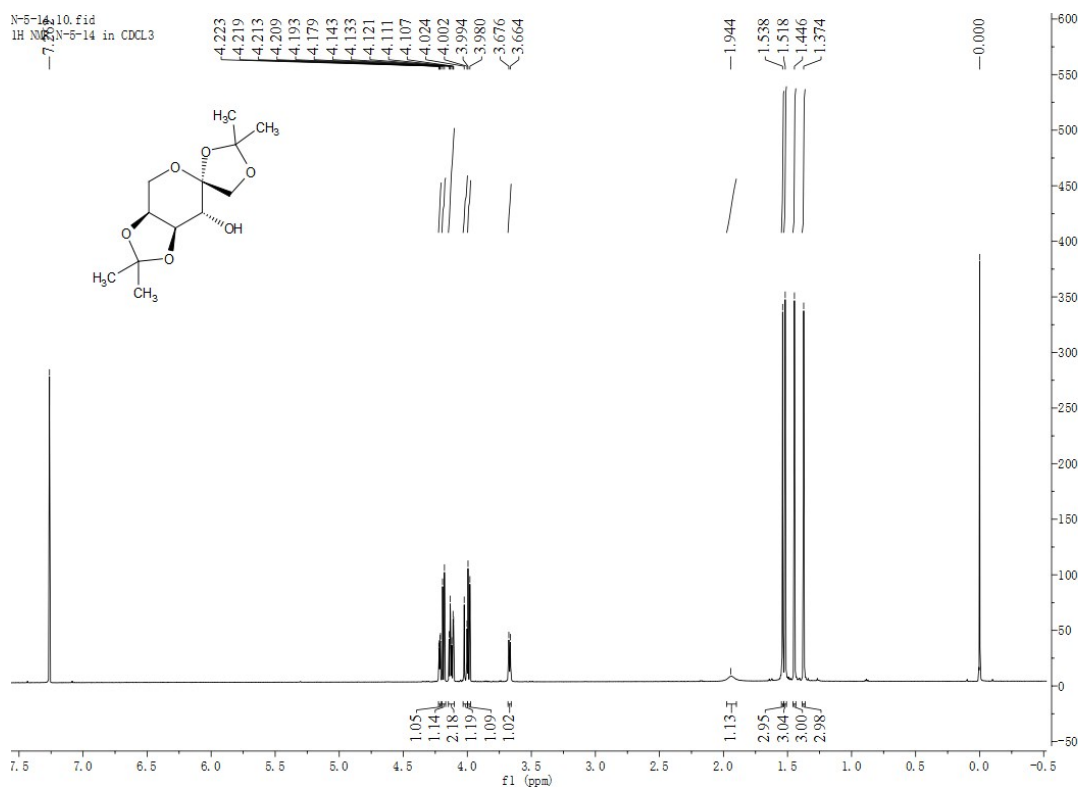

<sup>1</sup>H-NMR (600 MHz, CDCl<sub>3</sub>) spectrum for *ent*-14

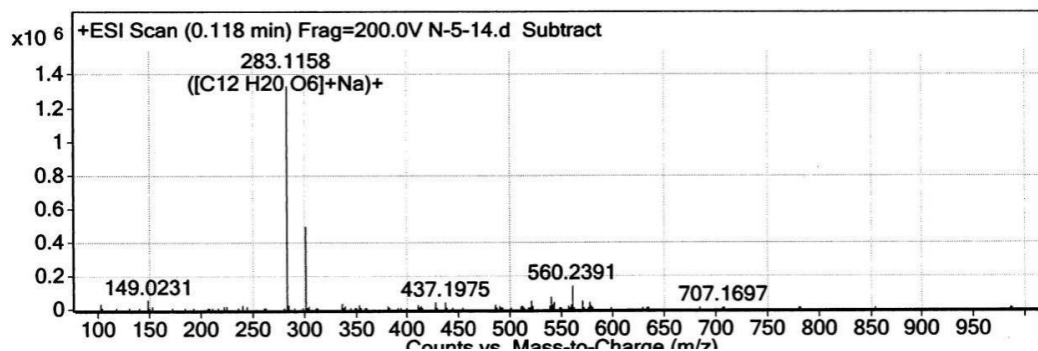

HRMS for *ent*-14

N-5-14- 11.fid  
 13C NMR N-5-14 in CDCl3

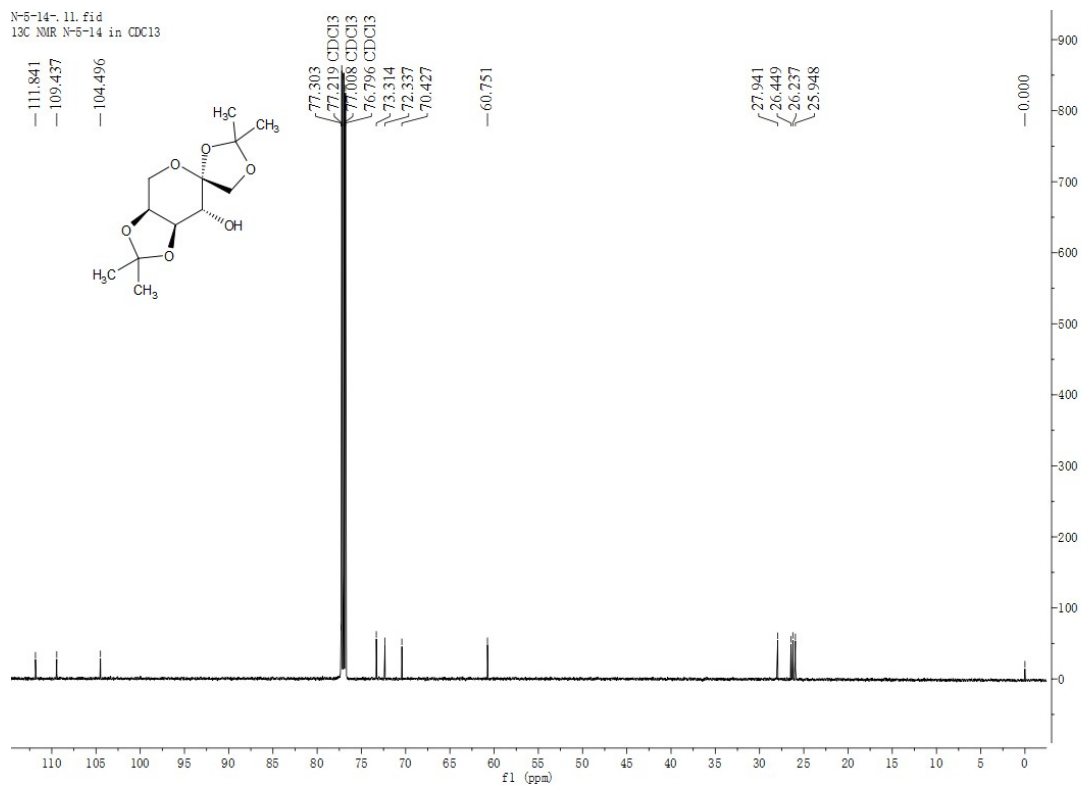

**<sup>13</sup>C-NMR (150 MHz, CDCl<sub>3</sub>) spectrum for *ent*-14**

N-5-27/6  
 AVANCE 400 IN CDCl3 By BBO  
 Sample: N-5-27

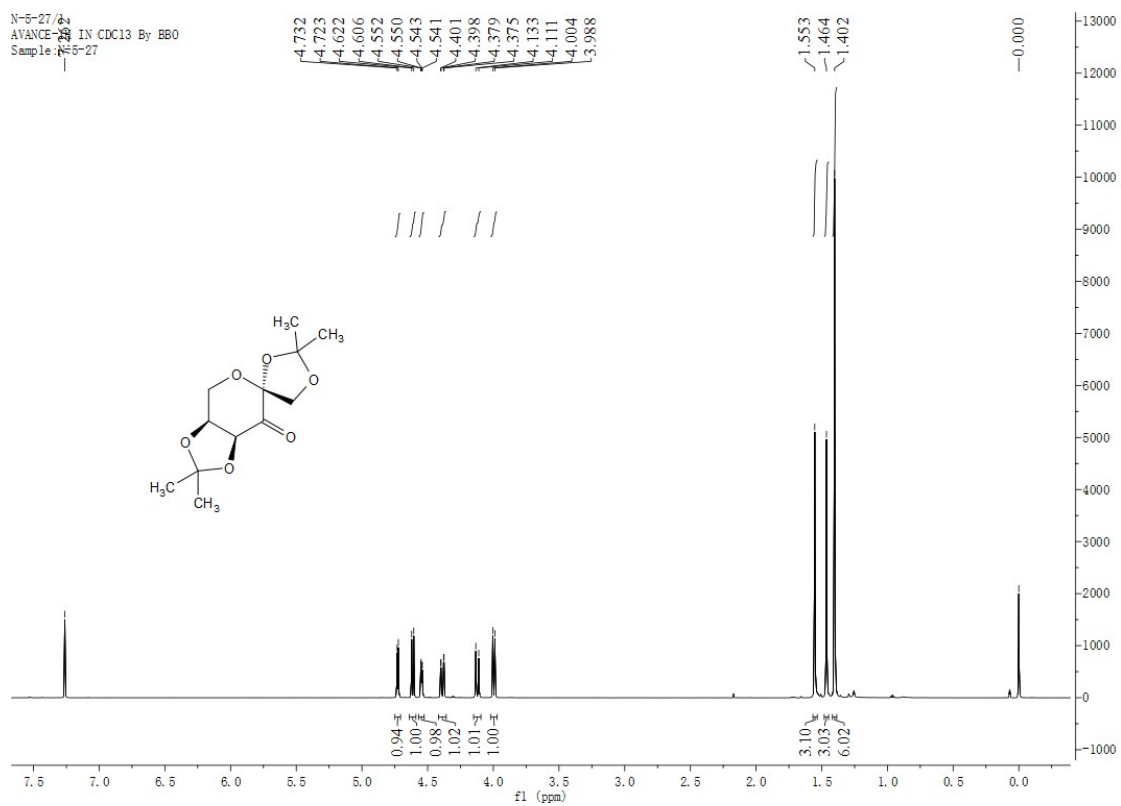

**<sup>1</sup>H-NMR (600 MHz, CDCl<sub>3</sub>) spectrum for *ent*-13**

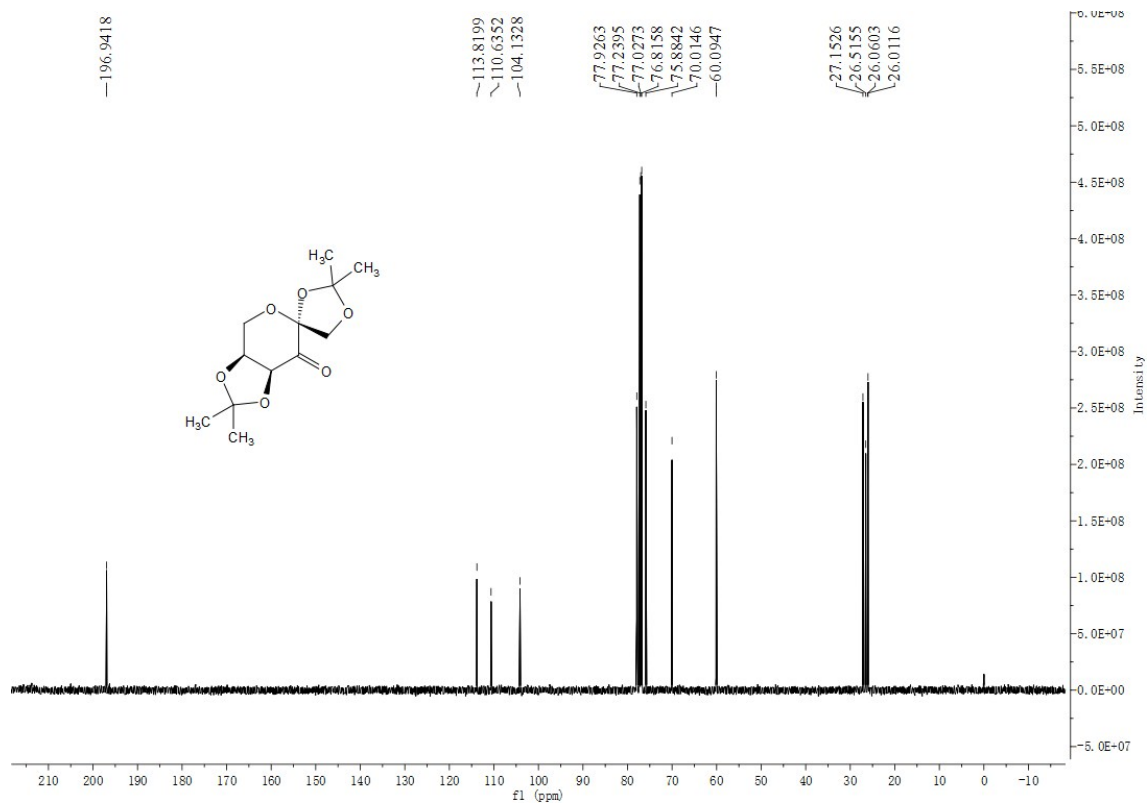

<sup>13</sup>C-NMR (150 MHz, CDCl<sub>3</sub>) spectrum for *ent-13*

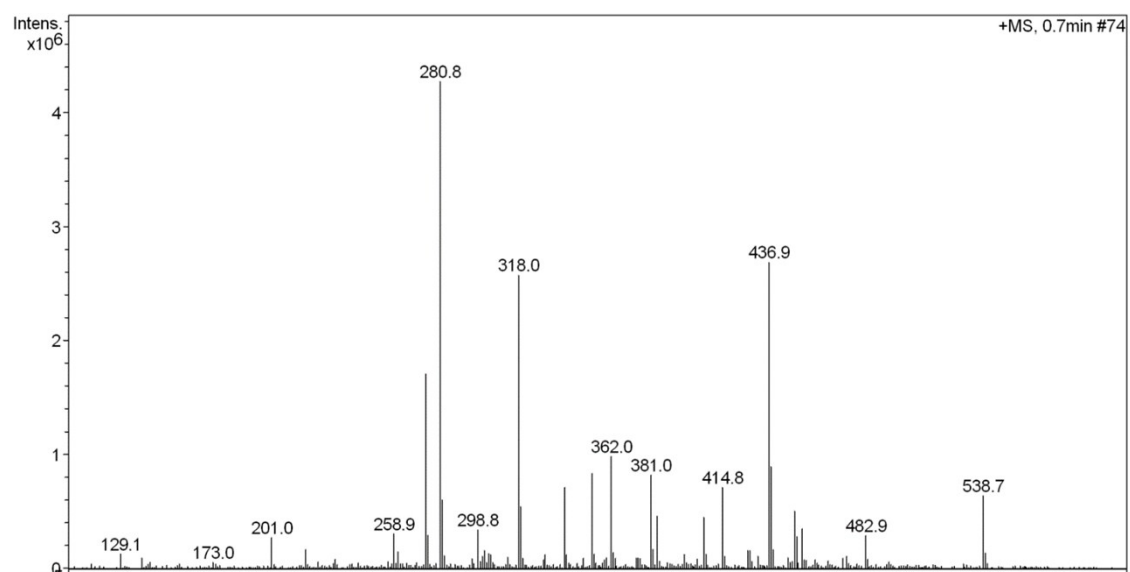

MS for *ent-13*

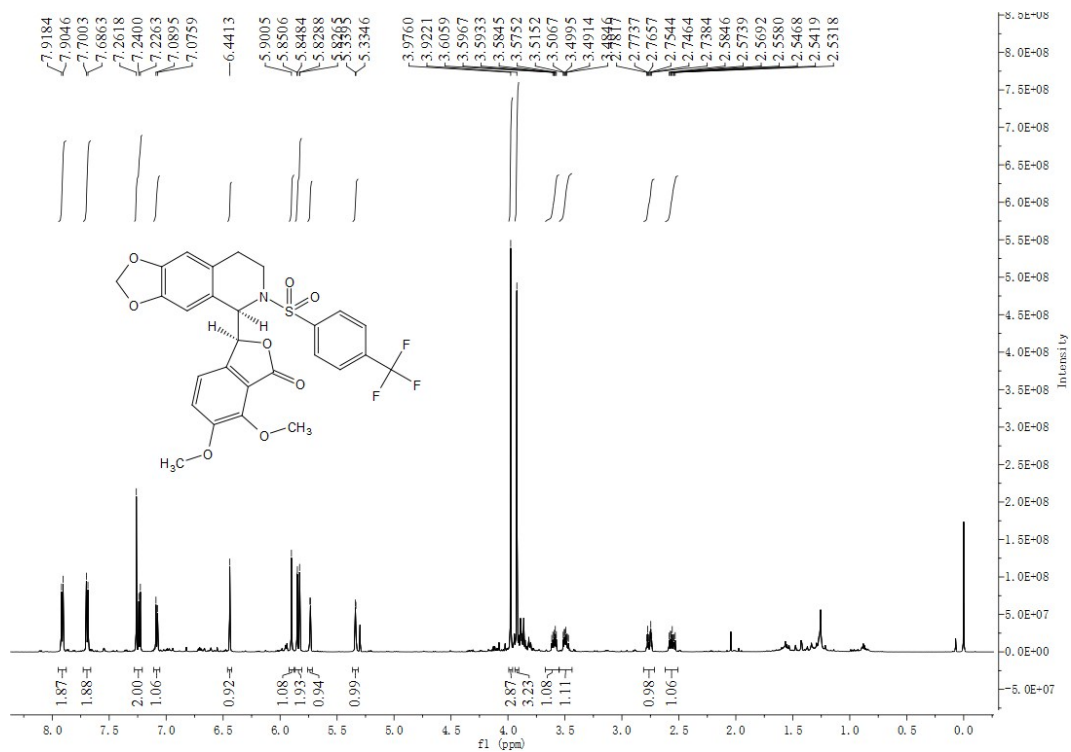

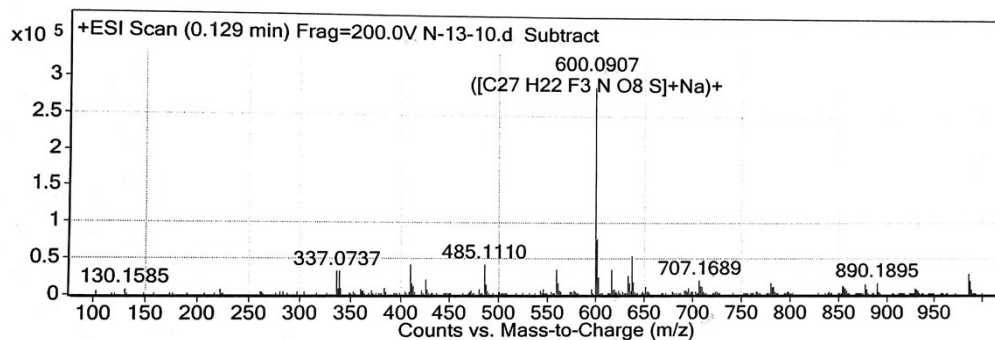

HRMS for (-)-β-18b

Chiral HPLC spectrum for (-)-β-18b

|                 |                                                        |
|-----------------|--------------------------------------------------------|
| Column          | : CHIRALPAK® IA                                        |
| Column size     | : 0.46 cm I.D. × 10 cm L × 5 μm                        |
| Injection       | : 10 μl                                                |
| Mobile phase    | : Hexane/ Ethanol / Diethylamine = 70/ 30/ 0.1 (v/v/v) |
| Flow rate       | : 1.0 ml/min                                           |
| Wave length     | : UV 254 nm                                            |
| Temperature     | : 35°C                                                 |
| Sample solution | : 0.8 mg/ml in DCM50% Hexane50%                        |
| HPLC equipment  | : Shimadzu LC 20A QA&QC-HPLC-12                        |

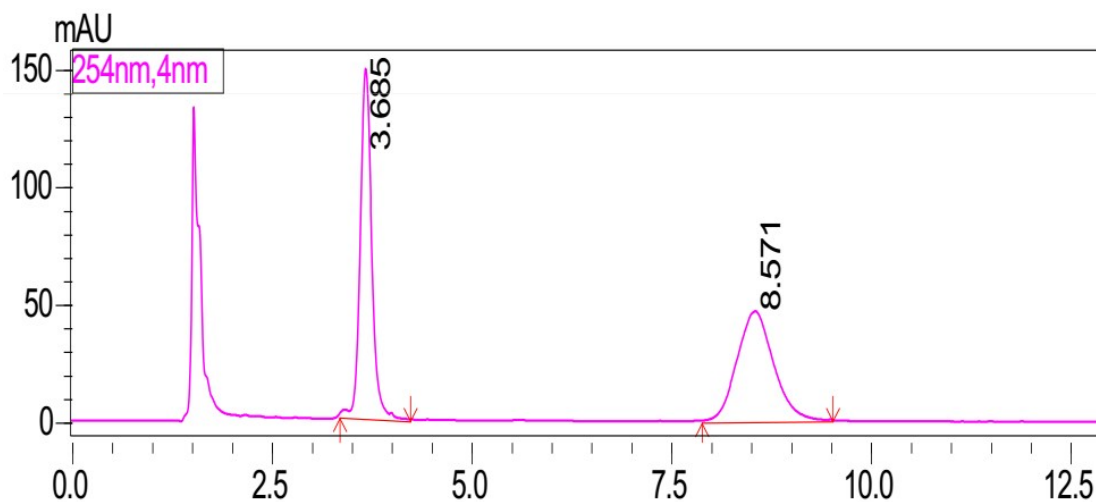

| Peak No. | Time  | Area    | Area % | Plate number | Tailing | Resolution |
|----------|-------|---------|--------|--------------|---------|------------|
| 1        | 3.685 | 1480419 | 50.587 | 3365         | 1.176   | --         |
| 2        | 8.571 | 1446040 | 49.413 | 1694         | 1.085   | 8.989      |

*Rac*-18b

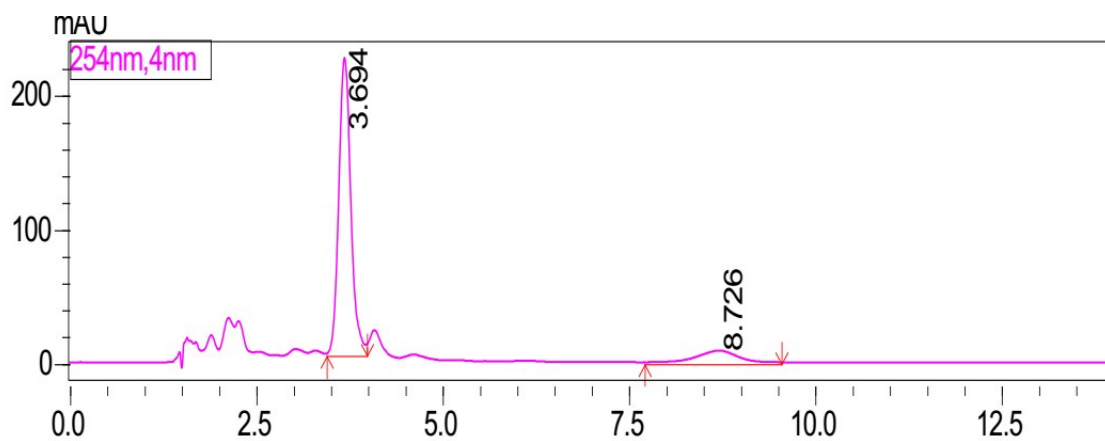

<Column Performance Report>

| Peak No. | Time  | Area    | Area % | Plate number | Tailing | Resolution |
|----------|-------|---------|--------|--------------|---------|------------|
| 1        | 3.694 | 2513716 | 89.196 | 2540         | 1.203   | --         |
| 2        | 8.726 | 304469  | 10.804 | 1434         | 0.902   | 8.284      |

(-)- $\beta$ -18b

## 6. References

- (1) (a) Kang, J.; Lim, G. J.; Yoon, S. K.; Kim, M. Y. *J. Org. Chem.* **1995**, *60*, 564-577. (b) Mio, S.; Kumagawa, Y.; Sugai, S. *Tetrahedron* **1991**, *47*, 2133-2144.
- (2) (a) Wang, Z.-X.; Tu, Y.; Frohn, M.; Zhang, J.-R.; Shi, Y. *J. Am. Chem. Soc.* **1997**, *119*, 11224-11235; (b) Tu, Y.; Wang, Z.-X.; Shi, Y. *J. Am. Chem. Soc.* **1996**, *118*, 9806-9807.
- (3) Wang, B.; Wu, X.-Y.; Wong, O. A.; Nettles, B.; Zhao, M.-X.; Chen, D.; Shi, Y. *J. Org. Chem.* **2009**, *74*, 3986-3989.
- (4) Orito, K.; Miyazawa, M.; Kanbayashi, R.; Tokuda, M.; Suginome, H. *J. Org. Chem.* **1999**, *64*, 6583-6596.
- (5) Blaskó G, Gula D J, Shamma M. *J. Nat. Prod.*, **1982**, *45*, 105-12.
